# Supplementary material
Source: PubMed Central journal article supplement (PMC7675034)
Supplement: mmc1.pdf [file mmc1.pdf]

## Supplemental Data

### Breast Cancer Polygenic Risk Score and Contralateral Breast Cancer Risk

Iris Kramer, Maartje J. Hooning, Nasim Mavaddat, Michael Hauptmann, Renske Keeman, Ewout W. Steyerberg, Daniele Giardiello, Antonis C. Antoniou, Paul D.P. Pharoah, Sander Canisius, Zumuruda Abu-Ful, Irene L. Andrulis, Hoda Anton-Culver, Kristan J. Aronson, Annelie Augustinsson, Heiko Becher, Matthias W. Beckmann, Sabine Behrens, Javier Benitez, Marina Bermisheva, Natalia V. Bogdanova, Stig E. Bojesen, Manjeet K. Bolla, Bernardo Bonanni, Hiltrud Brauch, Michael Bremer, Sara Y. Brucker, Barbara Burwinkel, Jose E. Castelao, Tsun L. Chan, Jenny Chang-Claude, Stephen J. Chanock, Georgia Chenevix-Trench, Ji-Yeob Choi, Christine L. Clarke, NBCS Collaborators, J. Margriet Collée, Fergus J. Couch, Angela Cox, Simon S. Cross, Kamila Czene, Mary B. Daly, Peter Devilee, Thilo Dörk, Isabel dos-Santos-Silva, Alison M. Dunning, Miriam Dwek, Diana M. Eccles, D. Gareth Evans, Peter A. Fasching, Henrik Flyger, Manuela Gago-Dominguez, Montserrat García-Closas, José A. García-Sáenz, Graham G. Giles, David E. Goldgar, Anna González-Neira, Christopher A. Haiman, Niclas Håkansson, Ute Hamann, Mikael Hartman, Bernadette A.M. Heemskerk-Gerritsen, Antoinette Hollestelle, John L. Hopper, Ming-Feng Hou, Anthony Howell, ABCTB Investigators, kConFab Investigators, Hidemi Ito, Milena Jakimovska, Anna Jakubowska, Wolfgang Janni, Esther M. John, Audrey Jung, Daehee Kang, C. Marleen Kets, Elza Khusnutdinova, Yon-Dschun Ko, Vessela N. Kristensen, Allison W. Kurian, Ava Kwong, Diether Lambrechts, Loic Le Marchand, Jingmei Li, Annika Lindblom, Jan Lubinski, Arto Mannermaa, Mehdi Manoochehri, Sara Margolin, Keitaro Matsuo, Dimitrios Mavroudis, Alfons Meindl, Roger L. Milne, Anna Marie Mulligan, Taru A. Muranen, Susan L. Neuhausen, Heli Nevanlinna, William G. Newman, Andrew F. Olshan, Janet E. Olson, Håkan Olsson, Tjoung-Won Park-Simon, Julian Peto, Christos Petridis, Dijana Plaseska-Karanfilska, Nadege Presneau, Katri Pylkäs, Paolo Radice, Gad Rennert, Atocha Romero, Rebecca Roylance, Emmanouil Saloustros, Elinor J. Sawyer, Rita K. Schmutzler, Lukas Schwentner, Christopher Scott, Mee-Hoong See, Mitul Shah, Chen-Yang Shen, Xiao-Ou Shu, Sabine Siesling, Susan Slager, Christof Sohn, Melissa C. Southey, John J. Spinelli, Jennifer Stone, William J. Tapper, Maria Tengström, Soo Hwang Teo, Mary Beth Terry, Rob A.E.M. Tollenaar, Ian Tomlinson, Melissa A. Troester, Celine M. Vachon, Chantal van Ongeval, Elke M. van Veen, Robert Winqvist, Alicja Wolk, Wei Zheng, Argyrios Ziogas, Douglas F. Easton, Per Hall, and Marjanka K. Schmidt

# Supplemental Figures

Figure S1A. Overview of the selection of women with breast cancer and control women for the European series

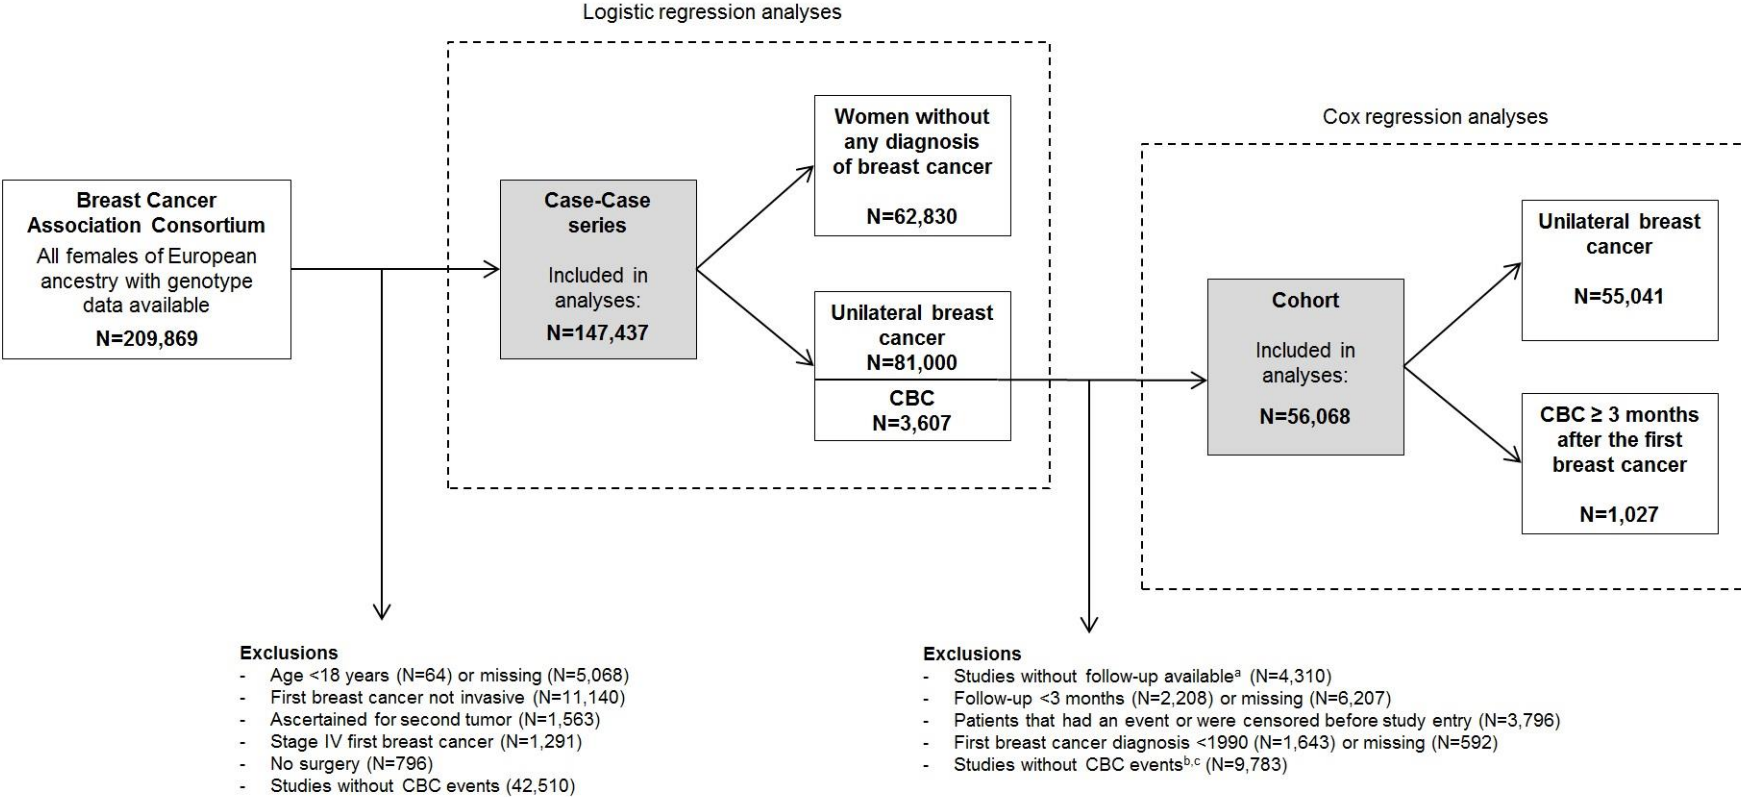

Abbreviations: CBC = contralateral breast cancer

For a complete overview of all studies see Table S1

<sup>a</sup> Excluded studies: CBCS, GLACIER, HMBCS, TNBCC

<sup>b</sup> Excluded studies: BCFR-NY, BCFR-UTAH, CNIO-BCS, DIETCOMPLYF, FHRISK, GESBC, HABCS, HUBCS, ICICLE, KBCP, MCCS, MMHS, NCBCS, PREFACE, SUCCESSB, SUCCESSC

<sup>c</sup> These studies dropped out because for these analyses the definition of CBC is based on the criteria that the CBC was diagnosed at least three months after the first breast cancer diagnosis

**Figure S1B. Overview of the selection of women with breast cancer and control women for Asian series**

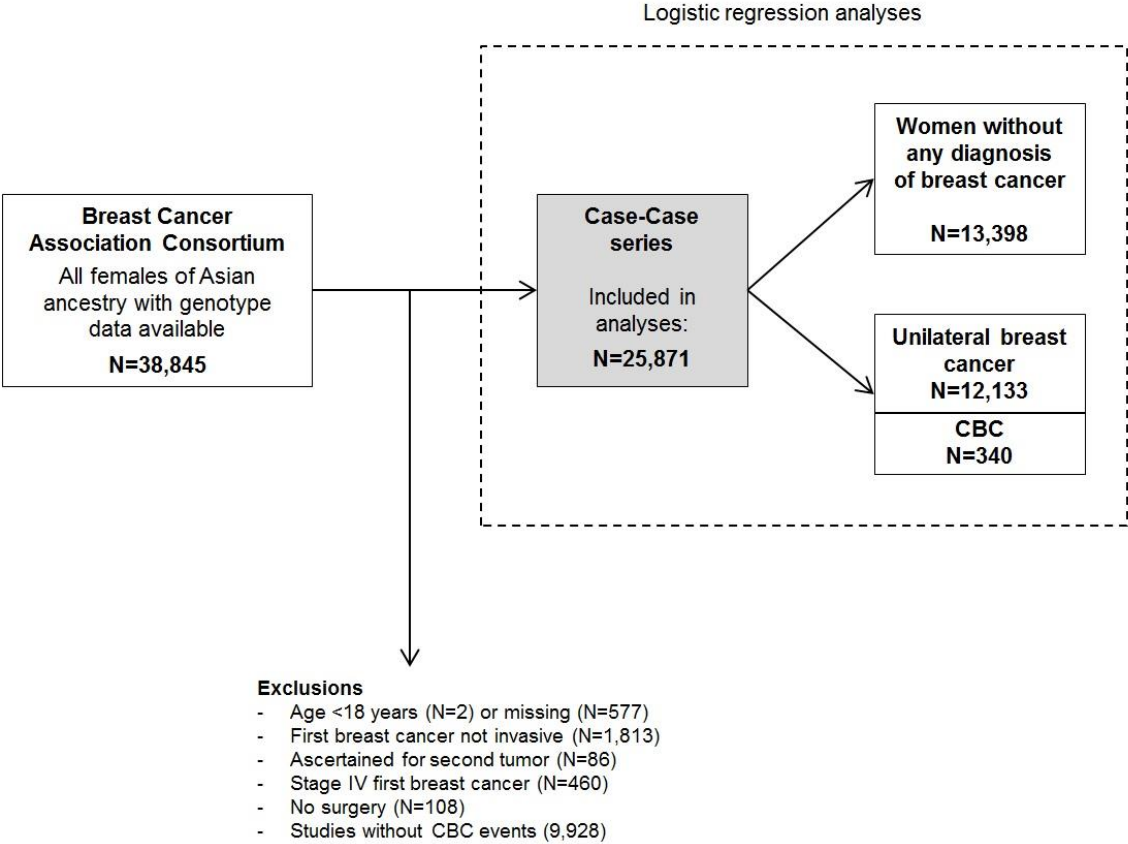

Abbreviations: CBC = contralateral breast cancer

**Figure S2. Correlation of total variant scores between the iCOGS array and OncoArray for the 77-variant PRS and the 313-variant PRS<sup>a,b</sup>**

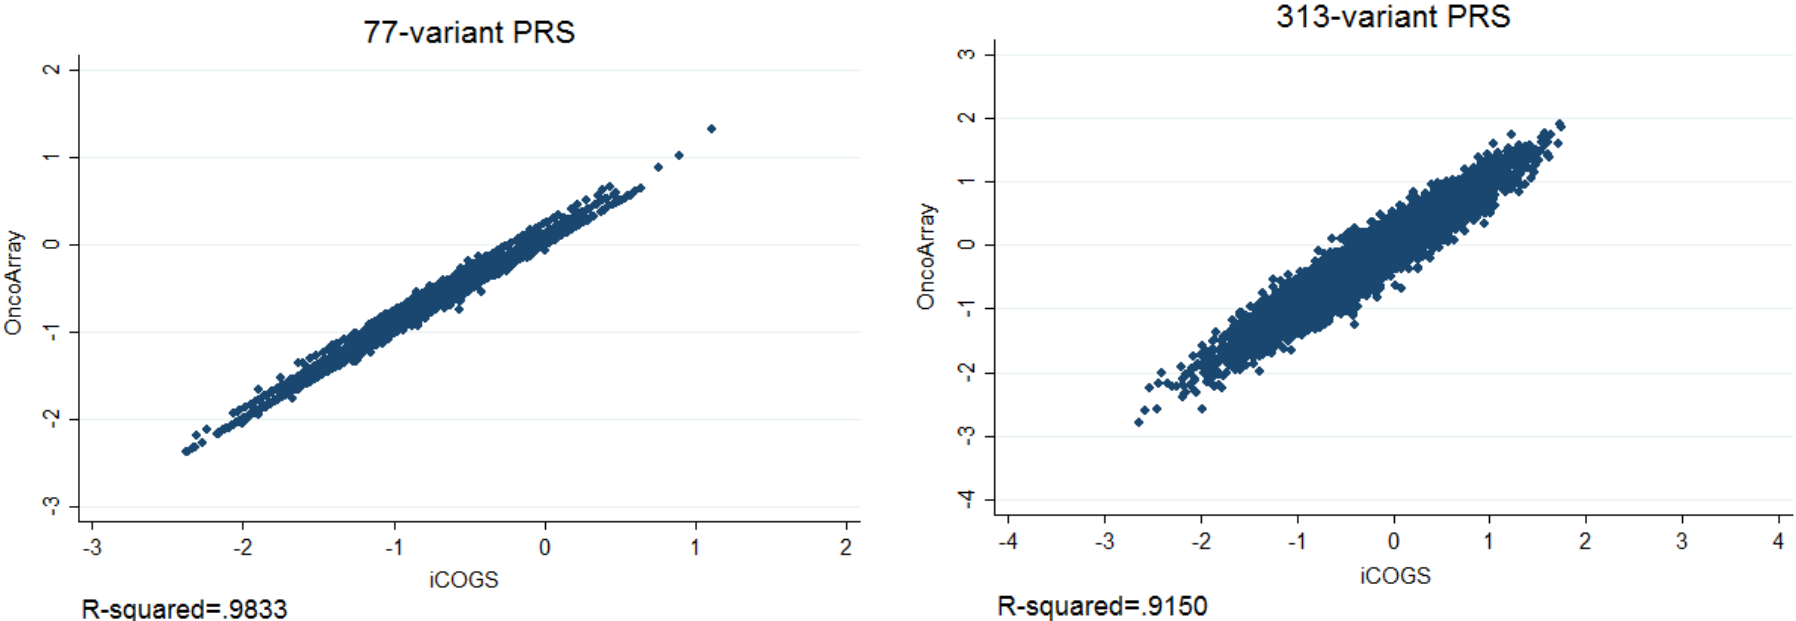

Abbreviations: PRS = polygenic risk score, SD = standard deviation

<sup>a</sup>We evaluated consistency between iCOGS and OncoArray using the intraclass correlation coefficient (ICC), showing a ICC of 0.99 (95%CI=0.99-0.99) for the PRS<sub>77</sub>, and an ICC of 0.96 (95%CI=0.95-0.96) for the PRS<sub>313</sub>, based on N=9,071 observations

<sup>b</sup>Coefficients to construct the PRSs are shown in Table S3. The PRSs were standardized by the same SD as was used by Mavaddat et al.<sup>1</sup>. The SD was 0.45 for overall breast cancer PRS<sub>77</sub>, and 0.61 for overall breast cancer PRS<sub>313</sub>

**Figure S3. Forest plot of the association between the 313-variant PRS and contralateral breast cancer risk by country<sup>a,b</sup>**

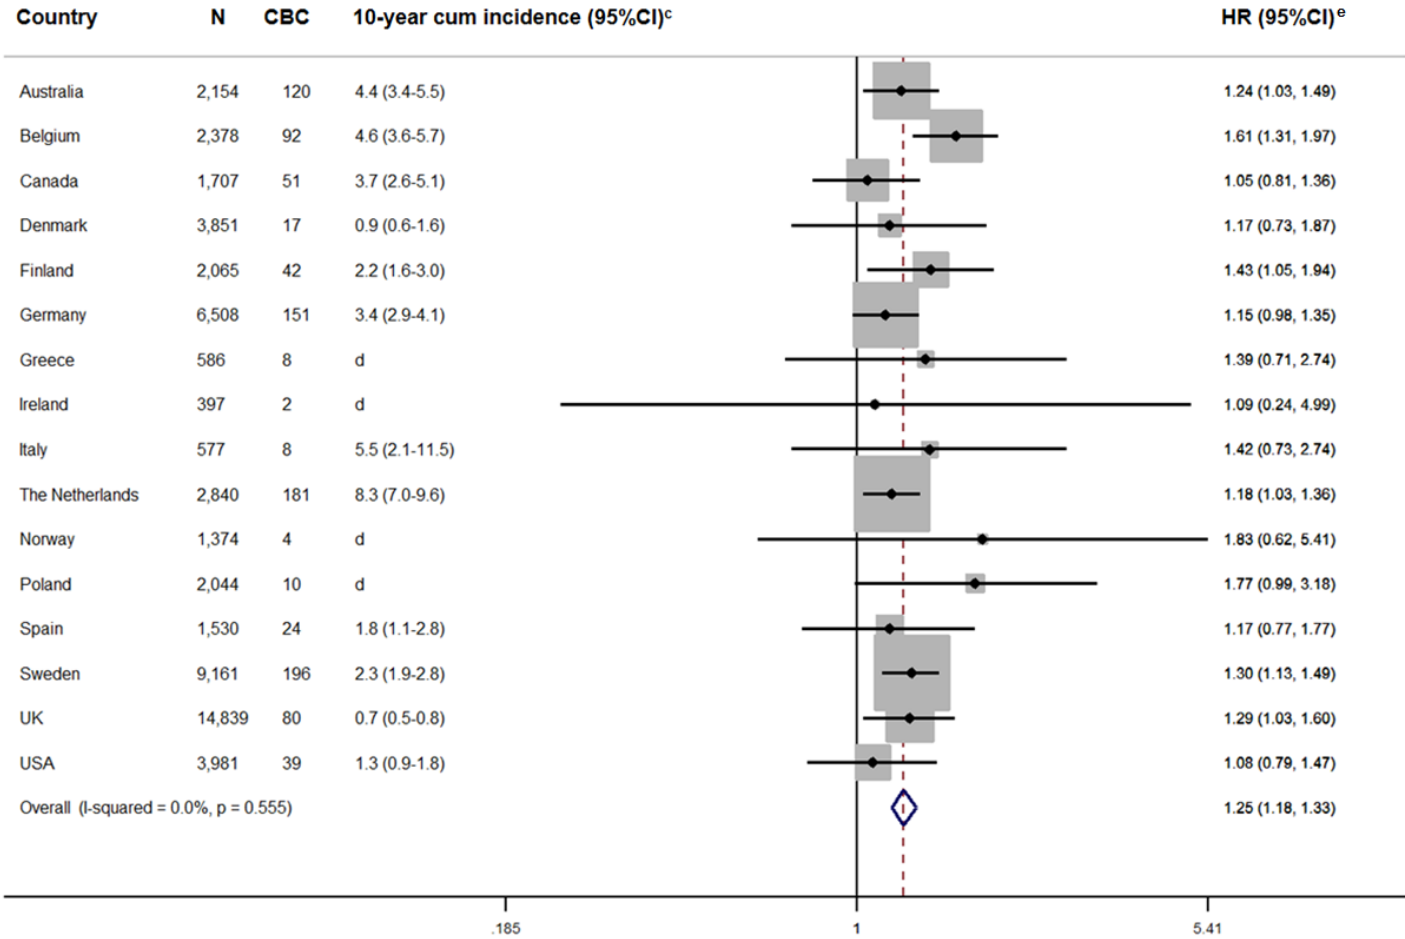

Abbreviations: PRS = polygenic risk score, N = number of women, CBC = contralateral breast cancer, cum = cumulative, CI = confidence interval, HR = hazard ratio, SD = standard deviation

Fixed effect meta-analysis was used to calculate I-squared and P-value for heterogeneity

<sup>a</sup> Republic of North Macedonia was left out this plot because of a too small sample size (N=76 women including N=2 CBC events)

<sup>b</sup> Coefficients to construct the PRS<sub>313</sub> are shown in Table S3. The PRS<sub>313</sub> was standardized by SD=0.61, in line with Mavaddat et al.<sup>1</sup>

<sup>c</sup> The 10-year cumulative incidence of CBC was estimated with time since first breast cancer as time scale, and distant metastases (where available) and death as competing risks

<sup>d</sup> Follow-up too short for calculating 10-year cumulative incidence

<sup>e</sup> HR per SD. The analyses were performed with attained age as the time scale

**Figure S4. Predicted contralateral breast cancer risk by percentile of the 313-variant PRS (PRS<sub>313</sub>)**

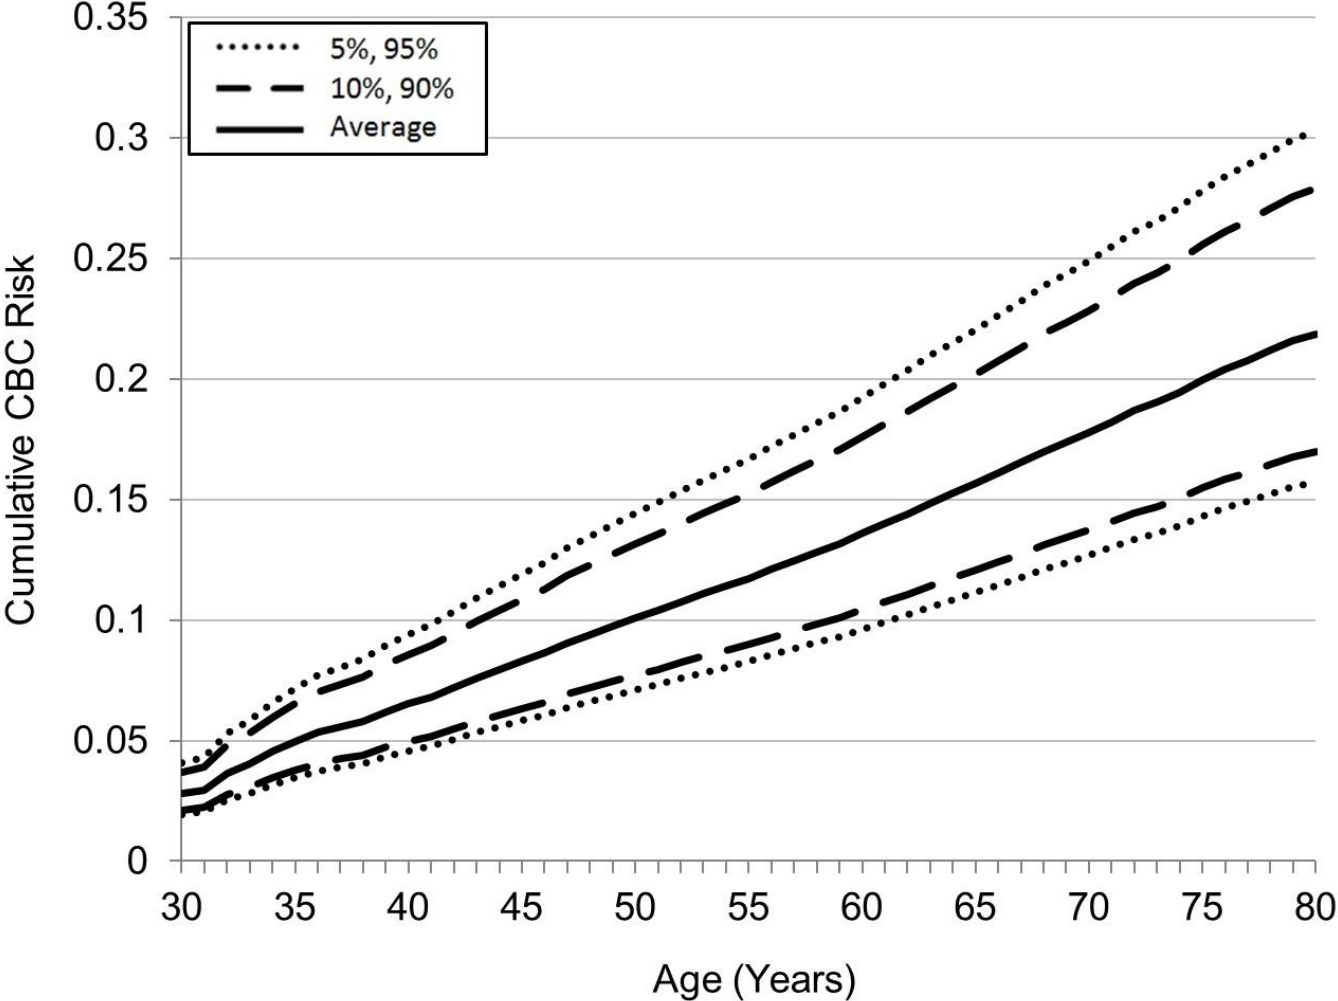

Abbreviations: PRS = polygenic risk score, CBC = contralateral breast cancer  
 Coefficients to construct the PRS<sub>313</sub> are shown in Table S3. The PRS<sub>313</sub> was standardized by SD=0.61, in line with Mavaddat et al<sup>1</sup>. The CBC incidences were calculated based on incidence data from the Netherlands Cancer Registry<sup>2</sup> and relative risks estimated as described in the Material and Methods. In contrast to Figure 2, death was not taken into account as competing risk.

## **Supplemental Tables**

**Table S1. Study characteristics of included studies of the Breast Cancer Association Consortium**

**Table S2. Studies and samples included in the analyses using the case-case series, cohort, and validation set**

| Studies      | European                           |                  |     |                          |     |                                  |                  |     |                                   | Asian            |     |  |
|--------------|------------------------------------|------------------|-----|--------------------------|-----|----------------------------------|------------------|-----|-----------------------------------|------------------|-----|--|
|              | Case-case series<br>N studies = 62 |                  |     | Cohort<br>N studies = 42 |     | Validation set<br>N studies = 24 |                  |     | Case-case series<br>N studies = 8 |                  |     |  |
|              | Control<br>women <sup>a</sup>      | Unilateral<br>BC | CBC | Unilateral<br>BC         | CBC | Control<br>women <sup>a</sup>    | Unilateral<br>BC | CBC | Control<br>women <sup>a</sup>     | Unilateral<br>BC | CBC |  |
| ABCFS        | 738                                | 1,149            | 127 | 1,021                    | 93  | -                                | -                | -   | -                                 | -                | -   |  |
| ABCS         | 1,567                              | 1,047            | 54  | 519                      | 14  | -                                | -                | -   | -                                 | -                | -   |  |
| ABCS-F       | 0                                  | 861              | 91  | 363                      | 17  | -                                | -                | -   | -                                 | -                | -   |  |
| ABCTB        | 375                                | 900              | 17  | 708                      | 1   | 74                               | 180              | 8   | -                                 | -                | -   |  |
| BBCC         | 711                                | 845              | 58  | 766                      | 6   | 49                               | 56               | 5   | -                                 | -                | -   |  |
| BBCS         | 1,768                              | 1,266            | 80  | 466                      | 1   | -                                | -                | -   | -                                 | -                | -   |  |
| BCEES        | -                                  | -                | -   | -                        | -   | 166                              | 133              | 0   | -                                 | -                | -   |  |
| BCFR-NY      | 27                                 | 340              | 61  | -                        | -   | -                                | -                | -   | -                                 | -                | -   |  |
| BCFR-PA      | 0                                  | 104              | 14  | 69                       | 4   | -                                | -                | -   | -                                 | -                | -   |  |
| BCFR-UTAH    | 0                                  | 13               | 87  | -                        | -   | -                                | -                | -   | -                                 | -                | -   |  |
| BCINIS       | -                                  | -                | -   | -                        | -   | 144                              | 262              | 0   | -                                 | -                | -   |  |
| BIGGS        | 49                                 | 713              | 50  | 395                      | 2   | -                                | -                | -   | -                                 | -                | -   |  |
| BREOGAN      | 725                                | 1,245            | 19  | 1,233                    | 15  | 145                              | 238              | 4   | -                                 | -                | -   |  |
| BSUCH        | 1,122                              | 900              | 36  | 727                      | 3   | -                                | -                | -   | -                                 | -                | -   |  |
| CBCS         | 817                                | 530              | 21  | -                        | -   | 163                              | 105              | 4   | 170                               | 238              | 10  |  |
| CCGP         | 321                                | 598              | 19  | 578                      | 8   | 66                               | 125              | 7   | -                                 | -                | -   |  |
| CGPS         | 5,250                              | 4,135            | 60  | 3,834                    | 17  | 142                              | 227              | 3   | -                                 | -                | -   |  |
| CNIO-BCS     | 829                                | 742              | 5   | -                        | -   | -                                | -                | -   | -                                 | -                | -   |  |
| CTS          | -                                  | -                | -   | -                        | -   | 115                              | 220              | 0   | -                                 | -                | -   |  |
| DIETCOMPLYF  | 0                                  | 704              | 1   | -                        | -   | -                                | -                | -   | -                                 | -                | -   |  |
| FHRISK       | 0                                  | 119              | 2   | -                        | -   | -                                | -                | -   | -                                 | -                | -   |  |
| GC-HBOC      | 1,732                              | 2,690            | 230 | 1,406                    | 47  | -                                | -                | -   | -                                 | -                | -   |  |
| GENICA       | 711                                | 869              | 26  | 869                      | 1   | 56                               | 89               | 2   | -                                 | -                | -   |  |
| GESBC        | 181                                | 303              | 3   | -                        | -   | -                                | -                | -   | -                                 | -                | -   |  |
| GLACIER      | 0                                  | 1,733            | 230 | -                        | -   | -                                | -                | -   | -                                 | -                | -   |  |
| HABCS        | 863                                | 774              | 84  | -                        | -   | 173                              | 141              | 6   | -                                 | -                | -   |  |
| HCSC         | 0                                  | 362              | 13  | 273                      | 9   | -                                | -                | -   | -                                 | -                | -   |  |
| HEBCS        | 1,060                              | 1,632            | 116 | 1,578                    | 41  | -                                | -                | -   | -                                 | -                | -   |  |
| HERPACC      | -                                  | -                | -   | -                        | -   | -                                | -                | -   | 1,659                             | 756              | 18  |  |
| HKBCS        | -                                  | -                | -   | -                        | -   | -                                | -                | -   | 451                               | 403              | 12  |  |
| HMBCS        | 345                                | 729              | 28  | -                        | -   | -                                | -                | -   | -                                 | -                | -   |  |
| HUBCS        | 116                                | 198              | 2   | -                        | -   | -                                | -                | -   | -                                 | -                | -   |  |
| ICICLE       | 1                                  | 138              | 12  | -                        | -   | -                                | -                | -   | -                                 | -                | -   |  |
| KARBAC       | 0                                  | 761              | 46  | 443                      | 32  | -                                | -                | -   | -                                 | -                | -   |  |
| KARMA        | 5,981                              | 2,314            | 96  | 2,188                    | 33  | 597                              | 185              | 10  | -                                 | -                | -   |  |
| KBCP         | 431                                | 516              | 9   | -                        | -   | -                                | -                | -   | -                                 | -                | -   |  |
| KCONFAB/AOCS | 898                                | 397              | 83  | 305                      | 26  | -                                | -                | -   | -                                 | -                | -   |  |
| LMBC         | 1,821                              | 3,016            | 208 | 2,286                    | 92  | 87                               | 142              | 14  | -                                 | -                | -   |  |
| MABCS        | 88                                 | 80               | 9   | 74                       | 2   | -                                | -                | -   | -                                 | -                | -   |  |



|                        |               |               |              |               |              |              |              |                |               |               |            |     |
|------------------------|---------------|---------------|--------------|---------------|--------------|--------------|--------------|----------------|---------------|---------------|------------|-----|
| MARIE                  | 2,066         | 1,540         | 115          | 1,535         | 53           | -            | -            | -              | -             | -             | -          |     |
| MBCSG                  | 766           | 1,015         | 150          | 569           | 8            | -            | -            | -              | -             | -             | -          |     |
| MCBCS                  | 2,093         | 1,999         | 59           | 1,903         | 6            | 35           | 96           | 3              | -             | -             | -          |     |
| MCCS                   | 1,207         | 1,034         | 2            | -             | -            | 142          | 86           | 0              | -             | -             | -          |     |
| MEC                    | 1,123         | 1,016         | 38           | 988           | 23           | -            | -            | -              | -             | -             | -          |     |
| MISS                   | 1,529         | 582           | 6            | 563           | 3            | 304          | 83           | 0              | -             | -             | -          |     |
| MMHS                   | 1,635         | 273           | 4            | -             | -            | 320          | 48           | 4              | -             | -             | -          |     |
| MYBRCA                 | -             | -             | -            | -             | -            | -            | -            | -              | 4,197         | 3,652         | 105        |     |
| NBCS                   | 212           | 2,334         | 31           | 1,370         | 4            | -            | -            | -              | -             | -             | -          |     |
| NBHS                   | -             | -             | -            | -             | -            | 122          | 79           | 0              | -             | -             | -          |     |
| NC-BCFR                | 150           | 614           | 69           | 602           | 5            | -            | -            | -              | 52            | 391           | 33         |     |
| NCBCS                  | 1,006         | 1,988         | 42           | -             | -            | -            | -            | -              | -             | -             | -          |     |
| OBCS                   | 414           | 467           | 10           | 445           | 1            | -            | -            | -              | -             | -             | -          |     |
| OFBCR                  | 728           | 1,908         | 143          | 1,656         | 51           | -            | -            | -              | -             | -             | -          |     |
| ORIGO                  | 0             | 1,090         | 89           | 1,053         | 69           | 132          | 134          | 15             | -             | -             | -          |     |
| PBCS                   | 2,082         | 1,719         | 40           | 1,625         | 9            | 331          | 215          | 2              | -             | -             | -          |     |
| PKARMA                 | 5,435         | 4,81          | 277          | 4,685         | 124          | 1            | 4            | 0              | -             | -             | -          |     |
| POSH                   | 0             | 1,069         | 19           | 1,063         | 16           | -            | -            | -              | -             | -             | -          |     |
| PREFACE                | 0             | 2,73          | 90           | -             | -            | -            | -            | -              | -             | -             | -          |     |
| PROCAS                 | 1,647         | 488           | 9            | 422           | 3            | -            | -            | -              | -             | -             | -          |     |
| RBCS                   | 0             | 873           | 152          | 724           | 81           | -            | -            | -              | -             | -             | -          |     |
| SASBAC                 | 1,378         | 1,118         | 22           | 1,086         | 5            | -            | -            | -              | -             | -             | -          |     |
| SBCS                   | 848           | 748           | 14           | 691           | 1            | -            | -            | -              | -             | -             | -          |     |
| SEARCH                 | 9,056         | 12,423        | 118          | 12,117        | 59           | 197          | 628          | 0              | -             | -             | -          |     |
| SEBCS                  | -             | -             | -            | -             | -            | -            | -            | -              | 2,236         | 2,080         | 21         |     |
| SGBCC                  | -             | -             | -            | -             | -            | -            | -            | -              | 4,141         | 1,250         | 124        |     |
| SKKDKFZS               | 29            | 1,084         | 71           | 1,054         | 41           | -            | -            | -              | -             | -             | -          |     |
| SMC                    | -             | -             | -            | -             | -            | 141          | 244          | 0              | -             | -             | -          |     |
| SUCCESSB               | 0             | 438           | 2            | -             | -            | -            | -            | -              | -             | -             | -          |     |
| SUCCESSC               | 0             | 2,807         | 29           | -             | -            | -            | -            | -              | -             | -             | -          |     |
| SZBCS                  | 489           | 676           | 6            | 409           | 1            | -            | -            | -              | -             | -             | -          |     |
| TNBCC                  | 152           | 1,037         | 2            | -             | -            | -            | -            | -              | -             | -             | -          |     |
| TWBCS                  | -             | -             | -            | -             | -            | -            | -            | -              | 492           | 1,250         | 17         |     |
| UCIBCS                 | 258           | 397           | 1            | 380           | 1            | 51           | 61           | 7              | -             | -             | -          |     |
| <b>Total</b>           | <b>62,830</b> | <b>81,000</b> | <b>3,607</b> | <b>55,041</b> | <b>1,027</b> | <b>3,753</b> | <b>3,781</b> | <b>94</b>      | <b>13,398</b> | <b>12,133</b> | <b>340</b> |     |
| <b>Characteristics</b> |               |               |              |               |              |              |              |                |               |               |            |     |
| <b>Invasiveness</b>    | in situ       | -             | excluded     | 361           | excluded     | 104          | -            | 3 <sup>b</sup> | 7             | -             | excluded   | 67  |
|                        | invasive      | -             | 79,876       | 2,200         | 54,675       | 670          | -            | 3,777          | 60            | -             | 11,929     | 209 |
|                        | unknown       | -             | 1,124        | 1,046         | 366          | 253          | -            | 1              | 27            | -             | 204        | 64  |
| <b>ER status</b>       | negative      | -             | 13,828       | 446           | 9,333        | 105          | -            | 766            | 8             | -             | 3,457      | 54  |
|                        | positive      | -             | 52,238       | 2,048         | 37,420       | 289          | -            | 3,001          | 47            | -             | 7,826      | 163 |
|                        | unknown       | -             | 14,934       | 1,113         | 8,288        | 633          | -            | 14             | 39            | -             | 850        | 123 |

Abbreviations: BC = breast cancer, CBC = contralateral breast cancer, ER = estrogen receptor

<sup>a</sup> Without any diagnosis of breast cancer

<sup>b</sup> Due to the use of a new freeze of the BCAC data, N=3 breast cancers were now defined as in situ, which had previously been defined as invasive; the original validation dataset contained data of two additional studies<sup>1</sup>

**Table S3. Variant information and breast cancer risk coefficients for the 77-variant PRS, 313-variant PRS, and ER-specific PRSs; previously published in Mavaddat et al.<sup>1;3</sup>**

**Table S4. Patient, tumor, and treatment characteristics of all women diagnosed with first invasive breast cancer since 1990 (European cohort)**

| <b>Characteristics</b>                                | <b>Number of women (%)<sup>a</sup></b> |
|-------------------------------------------------------|----------------------------------------|
| <b>Total</b>                                          | 56,068 (100)                           |
| <b>Median age at first diagnosis in years (range)</b> | 56 (18-98)                             |
| <b>Year of diagnosis</b>                              |                                        |
| 1990-1994                                             | 3,029 (5.4)                            |
| 1995-1999                                             | 10,153 (18.1)                          |
| 2000-2004                                             | 18,484 (33.0)                          |
| 2005-2009                                             | 17,575 (31.3)                          |
| 2010-2015                                             | 6,827 (12.2)                           |
| <b>Family history (first degree relative)</b>         |                                        |
| no                                                    | 33,623 (76.4)                          |
| yes                                                   | 10,369 (23.6)                          |
| unknown                                               | 12,076                                 |
| <b>Nodal status</b>                                   |                                        |
| negative                                              | 29,070 (61.9)                          |
| positive                                              | 17,903 (38.1)                          |
| unknown                                               | 9,095                                  |
| <b>Tumor size, cm</b>                                 |                                        |
| ≤2                                                    | 28,057 (63.8)                          |
| (2, 5]                                                | 14,138 (32.2)                          |
| >5                                                    | 1,750 (4.0)                            |
| unknown                                               | 12,123                                 |
| <b>Differentiation grade</b>                          |                                        |
| I                                                     | 8,721 (19.5)                           |
| II                                                    | 21,621 (48.3)                          |
| III                                                   | 14,454 (32.3)                          |
| unknown                                               | 11,272                                 |
| <b>Morphology</b>                                     |                                        |
| ductal                                                | 37,324 (76.6)                          |
| lobular                                               | 5,878 (12.1)                           |
| mixed (ductal and lobular)                            | 2,174 (4.5)                            |
| other                                                 | 3,344 (6.9)                            |
| unknown                                               | 7,348                                  |
|                                                       |                                        |

|                                        |                    |               |
|----------------------------------------|--------------------|---------------|
| <b>ER-status</b>                       |                    |               |
|                                        | negative           | 9,527 (20.0)  |
|                                        | positive           | 38,090 (80.0) |
|                                        | unknown            | 8,451         |
| <b>PR-status</b>                       |                    |               |
|                                        | negative           | 13,098 (32.6) |
|                                        | positive           | 27,044 (67.4) |
|                                        | unknown            | 15,926        |
| <b>HER2-status</b>                     |                    |               |
|                                        | negative           | 23,787 (82.7) |
|                                        | positive           | 4,969 (17.3)  |
|                                        | unknown            | 27,312        |
| <b>Surgery</b>                         |                    |               |
|                                        | yes, breast saving | 16,468 (42.3) |
|                                        | yes, mastectomy    | 11,315 (29.1) |
|                                        | yes, type unknown  | 11,163 (28.7) |
|                                        | unknown            | 17,122        |
| <b>(Neo)adjuvant chemotherapy</b>      |                    |               |
|                                        | no                 | 18,110 (49.4) |
|                                        | yes                | 18,559 (50.6) |
|                                        | unknown            | 19,399        |
| <b>(Neo)adjuvant endocrine therapy</b> |                    |               |
|                                        | no                 | 10,781 (28.3) |
|                                        | yes                | 27,322 (71.7) |
|                                        | unknown            | 17,965        |
| <b>Radiotherapy</b>                    |                    |               |
|                                        | no                 | 11,023 (27.4) |
|                                        | yes                | 29,142 (72.6) |
|                                        | unknown            | 15,903        |

Abbreviations: ER = estrogen receptor, PR = progesterone receptor, HER2 = human epidermal growth factor receptor 2

<sup>a</sup> Total may not be 100% because of rounding

**Table S5. Association between the 313-variant PRS (PRS<sub>313</sub>) and contralateral breast cancer risk in the European cohort**

| Percentile categories of the PRS <sub>313</sub> | No. of women | No. of CBC | HR per unit SD <sup>a</sup> | 95%CI     | P-value |
|-------------------------------------------------|--------------|------------|-----------------------------|-----------|---------|
| 0 <sup>th</sup> to 10 <sup>th</sup>             | 5,607        | 65         | 0.59                        | 0.45-0.78 | <.001   |
| 10 <sup>th</sup> to 20 <sup>th</sup>            | 5,606        | 79         | 0.71                        | 0.55-0.92 | .01     |
| 20 <sup>th</sup> to 40 <sup>th</sup>            | 11,214       | 165        | 0.74                        | 0.60-0.90 | .003    |
| 40 <sup>th</sup> to 60 <sup>th</sup>            | 11,214       | 224        | 1.00                        | Ref.      | -       |
| 60 <sup>th</sup> to 80 <sup>th</sup>            | 11,214       | 208        | 0.90                        | 0.74-1.08 | .25     |
| 80 <sup>th</sup> to 90 <sup>th</sup>            | 5,607        | 121        | 1.05                        | 0.84-1.31 | .69     |
| 90 <sup>th</sup> to 100 <sup>th</sup>           | 5,606        | 165        | 1.38                        | 1.13-1.69 | .002    |

Abbreviations: PRS = polygenic risk score, No = number, CBC = contralateral breast cancer, HR = hazard ratio, CI = confidence interval, SD = standard deviation

<sup>a</sup>The analysis was performed with attained age as time scale. Coefficients to construct the PRS<sub>313</sub> are shown in Table S3. The PRS<sub>313</sub> was standardized by SD=0.61, in line with Mavaddat et al.<sup>1</sup>

**Table S6. Multivariable Cox regression models of contralateral breast cancer risk by 313-variant PRS (PRS<sub>313</sub>) in all women, all women excluding studies oversampling cases with family history, and those with complete covariate information**

|                                                   | All patients                |           |         | All women excluding studies oversampling cases with family history |           |         | Complete case               |           |         |
|---------------------------------------------------|-----------------------------|-----------|---------|--------------------------------------------------------------------|-----------|---------|-----------------------------|-----------|---------|
|                                                   | N=56,068 (CBC=1,027)        |           |         | N=51,883 (CBC=829)                                                 |           |         | N=12,065 (CBC=193)          |           |         |
|                                                   | HR per unit SD <sup>a</sup> | 95%CI     | P-value | HR per unit SD <sup>a</sup>                                        | 95%CI     | P-value | HR per unit SD <sup>a</sup> | 95%CI     | P-value |
| <i>Model 1</i><br>PRS <sub>313</sub> <sup>b</sup> | 1.25                        | 1.18-1.33 | <.001   | 1.26                                                               | 1.17-1.34 | <.001   | 1.35                        | 1.17-1.56 | <.001   |
| <i>Model 2</i><br>PRS <sub>313</sub> <sup>b</sup> | 1.23                        | 1.16-1.31 | <.001   | 1.25                                                               | 1.17-1.34 | <.001   | 1.33                        | 1.15-1.54 | <.001   |
| Family history                                    |                             |           |         |                                                                    |           |         |                             |           |         |
| yes vs. no                                        | 1.43                        | 1.24-1.64 | <.001   | 1.34                                                               | 1.13-1.59 | .001    | 1.49                        | 1.06-2.09 | .02     |
| unknown vs. no                                    | 0.93                        | 0.75-0.16 | .54     | 0.92                                                               | 0.73-1.16 | .47     | -                           | -         | -       |
| <i>Model 3</i><br>PRS <sub>313</sub> <sup>b</sup> | 1.25                        | 1.18-1.33 | <.001   | 1.26                                                               | 1.17-1.34 | <.001   | 1.35                        | 1.17-1.56 | <.001   |
| Nodal status                                      |                             |           |         |                                                                    |           |         |                             |           |         |
| positive vs. negative                             | 1.05                        | 0.91-1.20 | .50     | 1.07                                                               | 0.92-1.25 | .37     | 1.14                        | 0.85-1.53 | .37     |
| unknown vs. no                                    | 1.26                        | 1.04-1.53 | .02     | 1.29                                                               | 1.04-1.60 | .02     | -                           | -         | -       |
| <i>Model 4</i><br>PRS <sub>313</sub> <sup>b</sup> | 1.25                        | 1.18-1.33 | <.001   | 1.26                                                               | 1.18-1.35 | <.001   | 1.35                        | 1.17-1.56 | <.001   |
| Tumor size,                                       |                             |           |         |                                                                    |           |         |                             |           |         |
| (2-5] vs. ≤2                                      | 1.08                        | 0.92-1.25 | .34     | 1.12                                                               | 0.95-1.32 | .20     | 0.93                        | 0.68-1.27 | .66     |
| >5 vs. ≤2                                         | 1.37                        | 0.99-1.89 | .06     | 1.45                                                               | 1.02-2.07 | .04     | 1.63                        | 0.93-2.85 | .09     |
| unknown vs. ≤2                                    | 1.23                        | 1.04-1.47 | .02     | 1.14                                                               | 0.94-1.39 | .18     | -                           | -         | -       |
| <i>Model 5</i><br>PRS <sub>313</sub> <sup>b</sup> | 1.25                        | 1.17-1.33 | <.001   | 1.25                                                               | 1.17-1.34 | <.001   | 1.35                        | 1.17-1.57 | <.001   |
| Differentiation grade                             |                             |           |         |                                                                    |           |         |                             |           |         |
| II vs. I                                          | 0.93                        | 0.76-1.13 | .45     | 0.99                                                               | 0.80-1.24 | .94     | 0.98                        | 0.65-1.48 | .93     |
| III vs. I                                         | 0.90                        | 0.73-1.12 | .35     | 0.97                                                               | 0.76-1.24 | .81     | 1.09                        | 0.70-1.69 | .69     |
| unknown vs. I                                     | 1.20                        | 0.96-1.49 | .11     | 1.45                                                               | 1.13-1.86 | .004    | -                           | -         | -       |
| <i>Model 6</i><br>PRS <sub>313</sub> <sup>b</sup> | 1.25                        | 1.17-1.33 | <.001   | 1.25                                                               | 1.17-1.34 | <.001   | 1.33                        | 1.16-1.54 | <.001   |
| Morphology                                        |                             |           |         |                                                                    |           |         |                             |           |         |
| lobular vs. ductal                                | 1.26                        | 1.03-1.53 | .03     | 1.34                                                               | 1.08-1.67 | .008    | 1.48                        | 0.99-2.21 | .05     |
| mixed (ductal and lobular) vs. ductal             | 1.28                        | 0.94-1.73 | .11     | 1.36                                                               | 0.98-1.88 | .06     | 1.48                        | 0.87-2.54 | .15     |
| other vs. ductal                                  | 1.04                        | 0.81-1.33 | .75     | 0.91                                                               | 0.66-1.24 | .55     | 1.24                        | 0.69-2.21 | .47     |
| unknown vs. ductal                                | 1.77                        | 1.42-2.19 | <.001   | 1.82                                                               | 1.44-2.30 | <.001   | -                           | -         | -       |
| <i>Model 7</i><br>PRS <sub>313</sub> <sup>b</sup> | 1.25                        | 1.18-1.33 | <.001   | 1.26                                                               | 1.18-1.35 | <.001   | 1.35                        | 1.17-1.56 | <.001   |
| ER-status                                         |                             |           |         |                                                                    |           |         |                             |           |         |
| positive vs. negative                             | 0.88                        | 0.75-1.04 | .14     | 0.86                                                               | 0.72-1.03 | .11     | 0.90                        | 0.62-1.32 | .60     |
| unknown vs. negative                              | 1.16                        | 0.93-0.43 | .19     | 1.11                                                               | 0.86-1.43 | .43     | -                           | -         | -       |
| <i>Model 7</i><br>PRS <sub>313</sub> <sup>b</sup> | 1.25                        | 1.18-1.33 | <.001   | 1.26                                                               | 1.18-1.35 | <.001   | 1.35                        | 1.17-1.56 | <.001   |

|                                              |                         |      |           |       |      |           |       |      |           |       |
|----------------------------------------------|-------------------------|------|-----------|-------|------|-----------|-------|------|-----------|-------|
| <b>PR-status</b>                             | positive vs. negative   | 0.95 | 0.81-1.11 | .51   | 0.92 | 0.78-1.09 | .32   | 0.91 | 0.66-1.25 | .56   |
|                                              | unknown vs. negative    | 1.15 | 0.95-1.40 | .14   | 1.10 | 0.88-1.37 | .40   | -    | -         | -     |
| <i>Model 9</i>                               |                         |      |           |       |      |           |       |      |           |       |
| <b>PRS<sub>313</sub><sup>b</sup></b>         |                         | 1.25 | 1.18-1.33 | <.001 | 1.26 | 1.17-1.34 | <.001 | 1.34 | 1.16-1.55 | <.001 |
| <b>HER2-status</b>                           | positive vs. negative   | 0.84 | 0.64-1.11 | .22   | 0.76 | 0.56-1.05 | .10   | 0.70 | 0.45-1.10 | .12   |
|                                              | unknown vs. negative    | 1.29 | 1.11-1.50 | .001  | 1.28 | 1.08-1.52 | .004  | -    | -         | -     |
| <i>Model 10</i>                              |                         |      |           |       |      |           |       |      |           |       |
| <b>PRS<sub>313</sub><sup>b</sup></b>         |                         | 1.25 | 1.17-1.32 | <.001 | 1.26 | 1.17-1.34 | <.001 | 1.35 | 1.16-1.56 | <.001 |
| <b>Chemotherapy</b>                          | yes vs. no              | 0.86 | 0.73-1.01 | .06   | 0.99 | 0.83-1.19 | .92   | 0.89 | 0.64-1.25 | .51   |
|                                              | unknown vs. no          | 1.09 | 0.91-1.31 | .34   | 1.20 | 0.97-1.47 | .09   | -    | -         | -     |
| <i>Model 11</i>                              |                         |      |           |       |      |           |       |      |           |       |
| <b>PRS<sub>313</sub><sup>b</sup></b>         |                         | 1.25 | 1.18-1.33 | <.001 | 1.26 | 1.18-1.35 | <.001 | 1.36 | 1.17-1.57 | <.001 |
| <b>Endocrine therapy</b>                     | yes vs. no              | 0.75 | 0.64-0.88 | .001  | 0.92 | 0.75-1.12 | .41   | 0.78 | 0.55-1.11 | .17   |
|                                              | unknown vs. no          | 0.90 | 0.75-1.09 | .28   | 1.11 | 0.87-1.41 | .39   | -    | -         | -     |
| <i>Model 12</i>                              |                         |      |           |       |      |           |       |      |           |       |
| <b>PRS<sub>313</sub><sup>b</sup></b>         |                         | 1.25 | 1.17-1.32 | <.001 | 1.26 | 1.17-1.34 | <.001 | 1.35 | 1.17-1.56 | <.001 |
| <b>Radiotherapy</b>                          | yes vs. no              | 1.00 | 0.85-1.18 | 1.00  | 0.98 | 0.82-1.18 | .85   | 1.35 | 0.88-2.08 | .17   |
|                                              | unknown vs. no          | 1.41 | 1.14-1.74 | .001  | 1.18 | 0.93-1.50 | .17   | -    | -         | -     |
| <i>Model 13</i>                              |                         |      |           |       |      |           |       |      |           |       |
| <b>PRS<sub>313</sub><sup>b</sup></b>         |                         | 1.25 | 1.17-1.32 | <.001 | 1.25 | 1.17-1.34 | <.001 | 1.34 | 1.16-1.55 | <.001 |
| <b>Year of first breast cancer diagnosis</b> |                         | 0.95 | 0.94-0.96 | <.001 | 0.95 | 0.93-0.96 | <.001 | 0.90 | 0.86-0.95 | <.001 |
| <i>Model 14</i>                              |                         |      |           |       |      |           |       |      |           |       |
| <b>PRS<sub>313</sub><sup>b</sup></b>         | full model <sup>c</sup> | 1.23 | 1.16-1.31 | <.001 | 1.25 | 1.16-1.33 | <.001 | 1.33 | 1.15-1.53 | <.001 |

Abbreviations: PRS = polygenic risk score, CBC = contralateral breast cancer, HR = hazard ratio, CI = confidence interval, SD = standard deviation, ER = estrogen receptor, PR = progesterone receptor, HER2 = human epidermal growth factor receptor 2

<sup>a</sup> All analyses were performed with attained age as the time scale

<sup>b</sup> Coefficients to construct the PRS<sub>313</sub> are shown in Table S3. The PRS<sub>313</sub> was standardized by SD=0.61, in line with Mavaddat et al.<sup>1</sup>

<sup>c</sup> Adjusted for family history, nodal status, tumor size, differentiation grade, morphology, ER status, HER2 status, chemotherapy, endocrine therapy, radiotherapy, and year of first breast cancer diagnosis

**Table S7. Five- and ten-year cumulative risks of contralateral breast cancer by the 313-variant PRS (PRS<sub>313</sub>) for different age groups**

| Age at first breast cancer diagnosis (years) | 5-year cumulative CBC risks (%)<br>range by age |                                                |                                                |                                                |                                                | 10-year cumulative CBC risks (%)<br>range by age |                                                |                                                |                                                |                                                |
|----------------------------------------------|-------------------------------------------------|------------------------------------------------|------------------------------------------------|------------------------------------------------|------------------------------------------------|--------------------------------------------------|------------------------------------------------|------------------------------------------------|------------------------------------------------|------------------------------------------------|
|                                              | 5 <sup>th</sup> percentile PRS <sub>313</sub>   | 10 <sup>th</sup> percentile PRS <sub>313</sub> | 50 <sup>th</sup> percentile PRS <sub>313</sub> | 90 <sup>th</sup> percentile PRS <sub>313</sub> | 95 <sup>th</sup> percentile PRS <sub>313</sub> | 5 <sup>th</sup> percentile PRS <sub>313</sub>    | 10 <sup>th</sup> percentile PRS <sub>313</sub> | 50 <sup>th</sup> percentile PRS <sub>313</sub> | 90 <sup>th</sup> percentile PRS <sub>313</sub> | 95 <sup>th</sup> percentile PRS <sub>313</sub> |
| 30-34                                        | 1.9-3.3                                         | 2.1-3.6                                        | 2.8-4.7                                        | 3.7-6.2                                        | 4.0-6.8                                        | 3.3-4.4                                          | 3.6-4.8                                        | 4.7-6.3                                        | 6.2-8.3                                        | 6.8-9.1                                        |
| 35-39                                        | 0.8-2.2                                         | 0.9-2.4                                        | 1.2-3.2                                        | 1.6-4.2                                        | 1.7-4.6                                        | 2.2-3.9                                          | 2.4-4.2                                        | 3.2-5.5                                        | 4.2-7.2                                        | 4.6-8.0                                        |
| 40-44                                        | 1.5-2.9                                         | 1.7-3.2                                        | 2.2-4.2                                        | 2.9-5.5                                        | 3.2-6.0                                        | 2.9-4.9                                          | 3.2-5.3                                        | 4.2-7.0                                        | 5.5-9.1                                        | 6.0-10.0                                       |
| 45-49                                        | 1.4-2.5                                         | 1.5-2.8                                        | 2.0-3.7                                        | 2.6-4.8                                        | 2.9-5.3                                        | 2.5-4.2                                          | 2.8-4.5                                        | 3.7-6.0                                        | 4.8-7.8                                        | 5.3-8.6                                        |
| 50-54                                        | 1.4-2.9                                         | 1.5-3.1                                        | 2.0-4.1                                        | 2.6-5.5                                        | 2.9-6.0                                        | 2.9-4.8                                          | 3.1-5.3                                        | 4.1-6.9                                        | 5.5-9.1                                        | 6.0-10.0                                       |
| 55-59                                        | 1.6-3.3                                         | 1.8-3.6                                        | 2.4-4.7                                        | 3.1-6.2                                        | 3.4-6.8                                        | 3.3-5.3                                          | 3.6-5.7                                        | 4.7-7.5                                        | 6.2-9.8                                        | 6.8-10.8                                       |
| 60-64                                        | 1.8-3.5                                         | 1.9-3.8                                        | 2.6-5.0                                        | 3.4-6.5                                        | 3.7-7.2                                        | 3.5-5.5                                          | 3.8-6.0                                        | 5.0-7.9                                        | 6.5-10.3                                       | 7.2-11.3                                       |
| 65-70                                        | 1.5-3.5                                         | 1.7-3.8                                        | 2.2-5.0                                        | 2.9-6.6                                        | 3.2-7.2                                        | 3.5-4.6                                          | 3.8-5.0                                        | 5.0-6.6                                        | 6.6-8.7                                        | 7.2-9.5                                        |

Abbreviations: PRS = polygenic risk score, CBC = contralateral breast cancer

Coefficients to construct the PRS<sub>313</sub> are shown in Table S3. The PRS<sub>313</sub> was standardized by SD=0.61, in line with Mavaddat et al<sup>1</sup>. The CBC incidences for each age group were calculated based on incidence data from the Netherlands Cancer Registry<sup>2</sup> and relative risks estimated as described in the Material and Methods. In contrast to Table 4, death was not taken into account as competing risk



**Table S8. Estimates of unilateral- and contralateral breast cancer risk by the 313-variant PRS (PRS<sub>313</sub>) in the European case-case series and the Asian case-case series**

|                                         | European                      |           |         |                             |           |         | Asian                         |           |         |
|-----------------------------------------|-------------------------------|-----------|---------|-----------------------------|-----------|---------|-------------------------------|-----------|---------|
|                                         | Case-case series <sup>a</sup> |           |         | Validation set <sup>b</sup> |           |         | Case-case series <sup>a</sup> |           |         |
| PRS <sub>313</sub> <sup>c</sup>         | OR per unit SD                | 95%CI     | P-value | OR per unit SD              | 95%CI     | P-value | OR per unit SD                | 95%CI     | P-value |
| Unilateral breast cancer versus control | 1.82                          | 1.80-1.84 | <.001   | 1.67                        | 1.59-1.76 | <.001   | 1.56                          | 1.52-1.60 | <.001   |
| CBC versus unilateral breast cancer     | 1.30                          | 1.26-1.35 | <.001   | 1.39                        | 1.13-1.70 | .002    | 1.15                          | 1.02-1.29 | .02     |

Abbreviations: PRS = polygenic risk score, CBC = contralateral breast cancer, OR = odds ratio, SD = standard deviation, CI = confidence interval

<sup>a</sup> Adjusted for country and age. For all women with unilateral- and contralateral breast cancer we used age at first breast cancer diagnosis, and for control women without any diagnosis of breast cancer we used age at baseline questionnaire.

<sup>b</sup> The validation set was previously used to develop the PRS<sub>313</sub>; see details in materials and methods. For analyses in the current paper, this set is nested within the case-case series. These analyses were additionally adjusted for 10 principal components for comparability with the originally published PRS<sub>313</sub> overall estimates<sup>1</sup>

<sup>c</sup> Coefficients to construct the PRS<sub>313</sub> are shown in Table S3. The PRS<sub>313</sub> was standardized by SD=0.61, in line with Mavaddat et al.<sup>1</sup>

## Supplemental Note

Our initial aim was to externally validate our results using the UK Biobank, which seemed the most suitable cohort given the large number of women diagnosed with breast cancer with information available on the PRS<sub>313</sub>. However, when we started the analyses, it turned out that the UK Biobank had no information available on the laterality of the second breast tumor. Therefore, we were unable to distinguish between ipsilateral and contralateral breast cancer, and had to define our endpoint in these analyses as ‘any second breast cancer’. In addition, in comparison to our analyses in the BCAC, we were unable to exclude patients diagnosed with stage IV invasive first breast cancer from the UK Biobank cohort, and had limited information on metastases developed during follow-up.

The association between the overall breast cancer PRS<sub>313</sub> and (any) second breast cancer was evaluated among women aged  $\geq 18$  years of European ancestry from the UK Biobank cohort who had had a diagnosis of invasive first breast cancer. UK Biobank samples were genotyped using Affymetrix UK BiLEVE Axiom array and Affymetrix UK Biobank Axiom® array and imputed to the combined 1000 Genome Project v3 and UK10K reference panels using SHAPEIT3 and IMPUTE3<sup>4</sup>. The lowest imputation info score for the variants used in these analyses was 0.86. Samples were included for this analysis of the UK BIOBANK study on the basis of female sex (genetic and self-reported) and ethnicity filter (Europeans/White British ancestry subset). Duplicates and individuals with high degree of relatedness (samples which have  $>10$  putative third degree relatives) were removed, and we randomly excluded one of each related pair first-degree relatives. Samples were also excluded on standard quality control criteria. The PRS<sub>313</sub> was calculated as a weighted sum of the minor allele dosages; the variant selection and weights are as given by Mavaddat et al<sup>1</sup>. The PRS<sub>313</sub> was standardized by SD=0.61, in line with our BCAC analyses and Mavaddat et al<sup>1</sup>.

The final cohort included 10,567 women with invasive breast cancer among whom 302 registry-confirmed second breast cancers developed over 59,260 person-years of follow-up. A Cox proportional hazards model was used to assess the association between  $PRS_{313}$  and second breast cancer risk. Time at risk started three months after the age of first breast cancer diagnosis, where this was diagnosed after the baseline questionnaire date, or three months after the baseline questionnaire where first breast cancer was diagnosed before the baseline questionnaire date. Time at risk ended at the age of second breast cancer diagnosis (ipsilateral or contralateral), distant metastasis (where available), death or end of follow-up (at latest December 10, 2016). Potential effect modification of the  $PRS_{313}$  by age was evaluated by adding an interaction term ( $PRS_{313} \times \text{age at first breast cancer diagnosis [continuous]}$ ) in the model. We performed a separate analysis for invasive second breast cancer (241 breast cancers), where we censored on in situ second breast cancer.

The HR for a second breast cancer (in situ or invasive) per SD of  $PRS_{313}$  in the UK Biobank cohort was 1.13 (95%CI=1.01-1.26). We found no indication for interaction with age at first breast cancer diagnosis ( $HR_{\text{interaction}}=1.00$ , 95%CI=0.99-1.01;  $P=0.87$ ). When analyses were restricted to invasive second breast cancer, the HR per SD was 1.13 (95%CI=1.00-1.29).

## **Supplemental Acknowledgements**

### **Funding**

This work was supported by the Alpe d'HuZes/Dutch Cancer Society (KWF Kankerbestrijding) (grant number A6C/6253).

BCAC is funded by Cancer Research UK [C1287/A16563, C1287/A10118], the European Union's Horizon 2020 Research and Innovation Programme (grant numbers 634935 and 633784 for BRIDGES and B-CAST respectively), and by the European Community's Seventh Framework Programme under grant agreement number 223175 (grant number HEALTH-F2-2009-223175) (COGS). The EU Horizon 2020 Research and Innovation Programme funding source had no role in study design, data collection, data analysis, data interpretation or writing of the report.

Genotyping of the OncoArray was funded by the NIH Grant U19 CA148065, and Cancer UK Grant C1287/A16563 and the PERSPECTIVE project supported by the Government of Canada through Genome Canada and the Canadian Institutes of Health Research (grant GPH-129344) and, the Ministère de l'Économie, Science et Innovation du Québec through Genome Québec and the PSRSIIRI-701 grant, and the Quebec Breast Cancer Foundation. Funding for the iCOGS infrastructure came from: the European Community's Seventh Framework Programme under grant agreement n° 223175 (HEALTH-F2-2009-223175) (COGS), Cancer Research UK (C1287/A10118, C1287/A10710, C12292/A11174, C1281/A12014, C5047/A8384, C5047/A15007, C5047/A10692, C8197/A16565), the National Institutes of Health (CA128978) and Post-Cancer GWAS initiative (1U19 CA148537, 1U19 CA148065 and 1U19 CA148112 - the GAME-ON initiative), the Department of Defence (W81XWH-10-1-0341), the Canadian Institutes of Health Research (CIHR) for the CIHR Team in Familial Risks of Breast Cancer, and Komen Foundation for the Cure, the Breast Cancer Research Foundation, and the Ovarian Cancer Research Fund.

The Australian Breast Cancer Family Study (ABCFS) was supported by grant UM1 CA164920 from the National Cancer Institute (USA). The content of this manuscript does not necessarily reflect the views or policies of the National Cancer Institute or any of the collaborating centers in the Breast Cancer Family Registry (BCFR), nor does mention of trade names, commercial products, or organizations imply endorsement by the USA Government or the BCFR. The ABCFS was also supported by the National Health and Medical Research Council of Australia, the New South Wales Cancer Council, the Victorian Health Promotion Foundation (Australia) and the Victorian Breast Cancer Research Consortium. J.L.H. is a National Health and Medical Research Council (NHMRC) Senior Principal Research Fellow. M.C.S. is a NHMRC Senior Research Fellow. The ABCS study was supported by the Dutch Cancer Society [grants NKI 2007-3839; 2009 4363]. The Australian Breast Cancer Tissue Bank (ABCTB) was supported by the National Health and Medical Research Council of Australia, The Cancer Institute NSW and the National Breast Cancer Foundation. The work of the BBCC was partly funded by ELAN-Fond of the University Hospital of Erlangen. The BBCS is funded by Cancer Research UK and Breast Cancer Now and acknowledges NHS funding to the NIHR Biomedical Research Centre, and the National Cancer Research Network (NCRN). The BCEES was funded by the National Health and Medical Research Council, Australia and the Cancer Council Western Australia and acknowledges funding from the National Breast Cancer Foundation (JS). For the BCFR-NY, BCFR-PA, BCFR-UT this work was supported by grant UM1 CA164920 from the National Cancer Institute. The content of this manuscript does not necessarily reflect the views or policies of the National Cancer Institute or any of the collaborating centers in the Breast Cancer Family Registry (BCFR), nor does mention of trade names, commercial products, or organizations imply endorsement by the US Government or the BCFR. The BCINIS study was supported in part by the BCRF (Breast Cancer Research Foundation, NY, USA). For BIGGS, ES is supported by NIHR Comprehensive Biomedical Research Centre, Guy's & St. Thomas' NHS Foundation Trust in partnership with King's College London, United Kingdom. IT is supported by the Oxford Biomedical Research Centre. The BREast Oncology GALician Network

(BREGAN) is funded by Acción Estratégica de Salud del Instituto de Salud Carlos III FIS PI12/02125/Cofinanciado FEDER, FIS PI17/00918/Cofinanciado FEDER; Acción Estratégica de Salud del Instituto de Salud Carlos III FIS Intrasalud (PI13/01136); Programa Grupos Emergentes, Cancer Genetics Unit, Instituto de Investigación Biomedica Galicia Sur. Xerencia de Xestión Integrada de Vigo-SERGAS, Instituto de Salud Carlos III, Spain; Grant 10CSA012E, Consellería de Industria Programa Sectorial de Investigación Aplicada, PEME I + D e I + D Suma del Plan Gallego de Investigación, Desarrollo e Innovación Tecnológica de la Consellería de Industria de la Xunta de Galicia, Spain; Grant EC11-192. Fomento de la Investigación Clínica Independiente, Ministerio de Sanidad, Servicios Sociales e Igualdad, Spain; and Grant FEDER-Innterconecta. Ministerio de Economía y Competitividad, Xunta de Galicia, Spain. The BSUCH study was supported by the Dietmar-Hopp Foundation, the Helmholtz Society and the German Cancer Research Center (DKFZ). CBCS is funded by the Canadian Cancer Society (grant # 313404) and the Canadian Institutes of Health Research. CCGP is supported by funding from the University of Crete. The CGPS was supported by the Chief Physician Johan Boserup and Lise Boserup Fund, the Danish Medical Research Council, and Herlev and Gentofte Hospital. The CNIO-BCS was supported by the Instituto de Salud Carlos III, the Fondo de Investigación Sanitario (PI16/00440 with FEDER funds), and CIBERER (Spanish Network on Rare diseases). The CTS was initially supported by the California Breast Cancer Act of 1993 and the California Breast Cancer Research Fund (contract 97-10500) and is currently funded through the National Institutes of Health (R01 CA77398, UM1 CA164917, and U01 CA199277). Collection of cancer incidence data was supported by the California Department of Public Health as part of the statewide cancer reporting program mandated by California Health and Safety Code Section 103885. HAC receives support from the Lon V Smith Foundation (LVS39420). The University of Westminster curates the DietCompLyf database funded by Against Breast Cancer Registered Charity No. 1121258 and the NCRN. FHRISK is funded from NIHR grant PGfAR 0707-10031. The GC-HBOC (German Consortium of Hereditary Breast and Ovarian Cancer) is supported by the German Cancer Aid (grant no 110837, coordinator: Rita K. Schmutzler, Cologne). This work was

also funded by the European Regional Development Fund and Free State of Saxony, Germany (LIFE - Leipzig Research Centre for Civilization Diseases, project numbers 713-241202, 713-241202, 14505/2470, 14575/2470). The GENICA was funded by the Federal Ministry of Education and Research (BMBF) Germany grants 01KW9975/5, 01KW9976/8, 01KW9977/0 and 01KW0114, the Robert Bosch Foundation, Stuttgart, Deutsches Krebsforschungszentrum (DKFZ), Heidelberg, the Institute for Prevention and Occupational Medicine of the German Social Accident Insurance, Institute of the Ruhr University Bochum (IPA), Bochum, as well as the Department of Internal Medicine, Evangelische Kliniken Bonn gGmbH, Johanniter Krankenhaus, Bonn, Germany. The GESBC was supported by the Deutsche Krebshilfe e. V. [70492] and the German Cancer Research Center (DKFZ). GLACIER was supported by Breast Cancer Now, CRUK and Biomedical Research Centre at Guy's and St Thomas' NHS Foundation Trust and King's College London. The HABCS study was supported by the Claudia von Schilling Foundation for Breast Cancer Research, by the Lower Saxonian Cancer Society, and by the Rudolf Bartling Foundation. The HEBCS was financially supported by the Helsinki University Hospital Research Fund, the Finnish Cancer Society, and the Sigrid Juselius Foundation. The HERPACC was supported by MEXT Kakenhi (No. 170150181 and 26253041) from the Ministry of Education, Science, Sports, Culture and Technology of Japan, by a Grant-in-Aid for the Third Term Comprehensive 10-Year Strategy for Cancer Control from Ministry Health, Labour and Welfare of Japan, by Health and Labour Sciences Research Grants for Research on Applying Health Technology from Ministry Health, Labour and Welfare of Japan, by National Cancer Center Research and Development Fund, and "Practical Research for Innovative Cancer Control (15ck0106177h0001)" from Japan Agency for Medical Research and development, AMED, and Cancer Bio Bank Aichi. The HMBCS was supported by a grant from the Friends of Hannover Medical School and by the Rudolf Bartling Foundation. The HUBCS was supported by a grant from the German Federal Ministry of Research and Education (RUS08/017), and by the Russian Foundation for Basic Research and the Federal Agency for Scientific Organizations for support the Bioresource collections and RFBR grants 14-04-97088, 17-29-06014 and 17-44-020498. ICICLE

was supported by Breast Cancer Now, CRUK and Biomedical Research Centre at Guy's and St Thomas' NHS Foundation Trust and King's College London. Financial support for KARBAC was provided through the regional agreement on medical training and clinical research (ALF) between Stockholm County Council and Karolinska Institutet, the Swedish Cancer Society, The Gustav V Jubilee foundation and Bert von Kantzows foundation. The KARMA study was supported by Märit and Hans Rausings Initiative Against Breast Cancer. The KBCP was financially supported by the special Government Funding (EVO) of Kuopio University Hospital grants, Cancer Fund of North Savo, the Finnish Cancer Organizations, and by the strategic funding of the University of Eastern Finland. kConFab is supported by a grant from the National Breast Cancer Foundation, and previously by the National Health and Medical Research Council (NHMRC), the Queensland Cancer Fund, the Cancer Councils of New South Wales, Victoria, Tasmania and South Australia, and the Cancer Foundation of Western Australia. Financial support for the AOCS was provided by the United States Army Medical Research and Materiel Command [DAMD17-01-1-0729], Cancer Council Victoria, Queensland Cancer Fund, Cancer Council New South Wales, Cancer Council South Australia, The Cancer Foundation of Western Australia, Cancer Council Tasmania and the National Health and Medical Research Council of Australia (NHMRC; 400413, 400281, 199600). G.C.T. and P.W. are supported by the NHMRC. RB was a Cancer Institute NSW Clinical Research Fellow. LMBC is supported by the 'Stichting tegen Kanker'. DL is supported by the FWO. The MABCS study is funded by the Research Centre for Genetic Engineering and Biotechnology "Georgi D. Efremov", MASA. The MARIE study was supported by the Deutsche Krebshilfe e.V. [70-2892-BR I, 106332, 108253, 108419, 110826, 110828], the Hamburg Cancer Society, the German Cancer Research Center (DKFZ) and the Federal Ministry of Education and Research (BMBF) Germany [01KH0402]. MBCSG is supported by grants from the Italian Association for Cancer Research (AIRC) and by funds from the Italian citizens who allocated the 5/1000 share of their tax payment in support of the Fondazione IRCCS Istituto Nazionale Tumori, according to Italian laws (INT-Institutional strategic projects "5x1000"). The MCBCS was supported by the NIH grants CA192393, CA116167,



CA176785 an NIH Specialized Program of Research Excellence (SPORE) in Breast Cancer [CA116201], and the Breast Cancer Research Foundation and a generous gift from the David F. and Margaret T. Grohne Family Foundation. The Melbourne Collaborative Cohort Study (MCCS) cohort recruitment was funded by VicHealth and Cancer Council Victoria. The MCCS was further augmented by Australian National Health and Medical Research Council grants 209057, 396414 and 1074383 and by infrastructure provided by Cancer Council Victoria. Cases and their vital status were ascertained through the Victorian Cancer Registry and the Australian Institute of Health and Welfare, including the National Death Index and the Australian Cancer Database. The Multiethnic Cohort Study (MEC) was funded by NIH grant U01 CA164973. The MEC was supported by NIH grants CA63464, CA54281, CA098758, CA132839 and CA164973. The MISS study is supported by funding from ERC-2011-294576 Advanced grant, Swedish Cancer Society, Swedish Research Council, Local hospital funds, Berta Kamprad Foundation, Gunnar Nilsson. The MMHS study was supported by NIH grants CA97396, CA128931, CA116201, CA140286 and CA177150. MYBRCA is funded by research grants from the Malaysian Ministry of Higher Education (UM.C/HIR/MOHE/06) and Cancer Research Malaysia. Genotyping for MyBrCa and SGBCC were supported by grants from Newton-Ungku Omar Fund [grant no: MR/P012930/1] and Wellcome Trust [grant no: v203477/Z/16/Z]. The Malaysian Breast Cancer Genetic Study was established using funds from the Malaysian Ministry of Science, and the Malaysian Ministry of Higher Education High Impact Research Grant [grant no: UM.C/HIR/MOHE/06]. The Malaysian Mammographic Density Study was established using funds raised through the Sime Darby LPGA tournament and the High Impact Research Grant. Additional funding was received from Yayasan Sime Darby, PETRONAS, Estee Lauder Group of Companies and other donors of Cancer Research Malaysia. MYMAMMO is supported by research grants from Yayasan Sime Darby LPGA Tournament and Malaysian Ministry of Higher Education (RP046B-15HTM). The NBCS has received funding from the K.G. Jebsen Centre for Breast Cancer Research; the Research Council of Norway grant 193387/V50 (to A-L Børresen-Dale and V.N. Kristensen) and grant 193387/H10 (to A-L Børresen-Dale and V.N. Kristensen), South Eastern Norway

Health Authority (grant 39346 to A-L Børresen-Dale) and the Norwegian Cancer Society (to A-L Børresen-Dale and V.N. Kristensen). The NBHS was supported by NIH grant R01CA100374. Biological sample preparation was conducted the Survey and Biospecimen Shared Resource, which is supported by P30 CA68485. The Northern California Breast Cancer Family Registry (NC-BCFR) and Ontario Familial Breast Cancer Registry (OFBCR) were supported by grant UM1 CA164920 from the National Cancer Institute (USA). The content of this manuscript does not necessarily reflect the views or policies of the National Cancer Institute or any of the collaborating centers in the Breast Cancer Family Registry (BCFR), nor does mention of trade names, commercial products, or organizations imply endorsement by the USA Government or the BCFR. The Carolina Breast Cancer Study was funded by Komen Foundation, the National Cancer Institute (P50 CA058223, U54 CA156733, U01 CA179715), and the North Carolina University Cancer Research Fund. The OBCS was supported by research grants from the Finnish Cancer Foundation, the Academy of Finland (grant number 250083, 122715 and Center of Excellence grant number 251314), the Finnish Cancer Foundation, the Sigrid Juselius Foundation, the University of Oulu, the University of Oulu Support Foundation and the special Governmental EVO funds for Oulu University Hospital-based research activities. The ORIGO study was supported by the Dutch Cancer Society (RUL 1997-1505) and the Biobanking and Biomolecular Resources Research Infrastructure (BBMRI-NL CP16). The PBCS was funded by Intramural Research Funds of the National Cancer Institute, Department of Health and Human Services, USA. The POSH study is funded by Cancer Research UK (grants C1275/A11699, C1275/C22524, C1275/A19187, C1275/A15956 and Breast Cancer Campaign 2010PR62, 2013PR044). PROCAS is funded from NIHR grant PGfAR 0707-10031. DGE, AH and WN are supported by the all Manchester NIHR Biomedical Research Centre (IS-BRC-1215-20007). The RBCS was funded by the Dutch Cancer Society (DDHK 2004-3124, DDHK 2009-4318). The SASBAC study was supported by funding from the Agency for Science, Technology and Research of Singapore (A\*STAR), the US National Institute of Health (NIH) and the Susan G. Komen Breast Cancer Foundation. The SBCS was supported by Sheffield Experimental Cancer Medicine Centre and

Breast Cancer Now Tissue Bank. SEARCH is funded by Cancer Research UK [C490/A10124, C490/A16561] and supported by the UK National Institute for Health Research Biomedical Research Centre at the University of Cambridge. The University of Cambridge has received salary support for PDPP from the NHS in the East of England through the Clinical Academic Reserve. SEBCS was supported by the BRL (Basic Research Laboratory) program through the National Research Foundation of Korea funded by the Ministry of Education, Science and Technology (2012-0000347). SGBCC is supported by the National Research Foundation Singapore (NRF-NRFF2017-02), NUS start-up Grant, National University Cancer Institute Singapore (NCIS) Centre Grant [NMRC/CG/NCIS/2010, NMRC/CG/012/2013, CGAug16M005], Saw Swee Hock School of Public Health Research Programme of Research Seed Funding (Breast Cancer Prevention Program), Asian Breast Cancer Research Fund, and the NMRC Clinician Scientist Award (SI Category) [NMRC/CSA-SI/0015/2017]. Controls from Singapore were recruited by the Singapore Consortium of Cohort Studies-Multi-ethnic cohort (SCCS-MEC), which was funded by the Biomedical Research Council, grant number: 05/1/21/19/425. SKKDKFZS is supported by the DKFZ. The SMC is funded by the Swedish Cancer Foundation and the Swedish Research Council (VR 2017-00644) grant for the Swedish Infrastructure for Medical Population-based Life-course Environmental Research (SIMPLER). The SZBCS was supported by Grant PBZ\_KBN\_122/P05/2004 and the program of the Minister of Science and Higher Education under the name "Regional Initiative of Excellence" in 2019-2022 project number 002 / RID / 2018/19, amount of financing 12 000 000 PLN. The TWBCS is supported by the Taiwan Biobank project of the Institute of Biomedical Sciences, Academia Sinica, Taiwan. The UCIBCS component of this research was supported by the NIH [CA58860, CA92044] and the Lon V Smith Foundation [LVS39420].

## **Acknowledgements**

We thank all the individuals who took part in these studies and all the researchers, clinicians, technicians and administrative staff who have enabled this work to be carried out. The COGS study would not have been possible without the contributions of the following: Kyriaki Michailidou, Qin Wang (BCAC). ABCFS thank Maggie Angelakos, Judi Maskiell, Gillian Dite. ABCS thanks the Blood bank Sanquin, The Netherlands. ABCTB Investigators: Christine Clarke, Deborah Marsh, Rodney Scott, Robert Baxter, Desmond Yip, Jane Carpenter, Alison Davis, Nirmala Pathmanathan, Peter Simpson, J. Dinny Graham, Mythily Sachchithananthan. Samples are made available to researchers on a non-exclusive basis. BBCS thanks Eileen Williams, Elaine Ryder-Mills, Kara Sargus. BCEES thanks Allyson Thomson, Christobel Saunders, Terry Slevin, BreastScreen Western Australia, Elizabeth Wylie, Rachel Lloyd. The BCINIS study would not have been possible without the contributions of Dr. K. Landsman, Dr. N. Gronich, Dr. A. Flugelman, Dr. W. Saliba, Dr. E. Liani, Dr. I. Cohen, Dr. S. Kalet, Dr. V. Friedman, Dr. O. Barnet of the NICCC in Haifa, and all the contributing family medicine, surgery, pathology and oncology teams in all medical institutes in Northern Israel. BIGGS thanks Niall McInerney, Gabrielle Colleran, Andrew Rowan, Angela Jones. The BREOGAN study would not have been possible without the contributions of the following: Manuela Gago-Dominguez, Jose Esteban Castelao, Angel Carracedo, Victor Muñoz Garzón, Alejandro Novo Domínguez, Maria Elena Martinez, Sara Miranda Ponte, Carmen Redondo Marey, Maite Peña Fernández, Manuel Enguix Castelo, Maria Torres, Manuel Calaza (BREOGAN), José Antúnez, Máximo Fraga and the staff of the Department of Pathology and Biobank of the University Hospital Complex of Santiago-CHUS, Instituto de Investigación Sanitaria de Santiago, IDIS, Xerencia de Xestión Integrada de Santiago-SERGAS; Joaquín González-Carreró and the staff of the Department of Pathology and Biobank of University Hospital Complex of Vigo, Instituto de Investigación Biomedica Galicia Sur, SERGAS, Vigo, Spain. BSUCH thanks Peter Bugert, Medical Faculty Mannheim. CBCS thanks study participants, co-investigators, collaborators and staff of the Canadian Breast Cancer Study, and project coordinators Agnes Lai and

Celine Morissette. CCGP thanks Styliani Apostolaki, Anna Margiolaki, Georgios Nintos, Maria Perraki, Georgia Saloustrou, Georgia Sevastaki, Konstantinos Pompodakis. CGPS thanks staff and participants of the Copenhagen General Population Study. For the excellent technical assistance: Dorthe Uldall Andersen, Maria Birna Arnadottir, Anne Bank, Dorthe Kjeldgård Hansen. The Danish Cancer Biobank is acknowledged for providing infrastructure for the collection of blood samples for the cases. CNIO-BCS thanks Guillermo Pita, Charo Alonso, Nuria Álvarez, Pilar Zamora, Primitiva Menendez, the Human Genotyping-CEGEN Unit (CNIO). The CTS Steering Committee includes Leslie Bernstein, Susan Neuhausen, James Lacey, Sophia Wang, Huiyan Ma, and Jessica Clague DeHart at the Beckman Research Institute of City of Hope, Dennis Deapen, Rich Pinder, and Eunjung Lee at the University of Southern California, Pam Horn-Ross, Peggy Reynolds, Christina Clarke Dur and David Nelson at the Cancer Prevention Institute of California, Hoda Anton-Culver, Argyrios Ziogas, and Hannah Park at the University of California Irvine, and Fred Schumacher at Case Western University. DIETCOMPLYF thanks the patients, nurses and clinical staff involved in the study. The DietCompLyf study was funded by the charity Against Breast Cancer (Registered Charity Number 1121258) and the NCRN. FHRISK thanks NIHR for funding. GC-HBOC thanks Stefanie Engert, Heide Hellebrand, Sandra Kröber and LIFE - Leipzig Research Centre for Civilization Diseases (Markus Loeffler, Joachim Thiery, Matthias Nüchter, Ronny Baber). The GENICA Network: Dr. Margarete Fischer-Bosch-Institute of Clinical Pharmacology, Stuttgart, and University of Tübingen, Germany [HB, Wing-Yee Lo], German Cancer Consortium (DKTK) and German Cancer Research Center (DKFZ), Partner Site Tübingen, 72074 Tübingen, Germany [HB], gefördert durch die Deutsche Forschungsgemeinschaft (DFG) im Rahmen der Exzellenzstrategie des Bundes und der Länder - EXC 2180 - 390900677 [HB], Department of Internal Medicine, Evangelische Kliniken Bonn gGmbH, Johanniter Krankenhaus, Bonn, Germany [Yon-Dschun Ko, Christian Baisch], Institute of Pathology, University of Bonn, Germany [Hans-Peter Fischer], Molecular Genetics of Breast Cancer, Deutsches Krebsforschungszentrum (DKFZ), Heidelberg, Germany [Ute Hamann], Institute for Prevention and Occupational Medicine of

the German Social Accident Insurance, Institute of the Ruhr University Bochum (IPA), Bochum, Germany [Thomas Brüning, Beate Pesch, Sylvia Rabstein, Anne Lotz]; and Institute of Occupational Medicine and Maritime Medicine, University Medical Center Hamburg-Eppendorf, Germany [Volker Harth]. GLACIER thanks Kelly Kohut, Patricia Gorman, Maria Troy. HABCS thanks Michael Bremer. HEBCS thanks Johanna Kiiski, Carl Blomqvist, Kristiina Aittomäki, Rainer Fagerholm, Kirsimari Aaltonen, Karl von Smitten, Irja Erkkilä. HKBCS thanks Hong Kong Sanatorium and Hospital, Dr Ellen Li Charitable Foundation, The Kerry Group Kuok Foundation, National Institute of Health 1R03CA130065 and the North California Cancer Center for support. HMBCS thanks Peter Hillemanns, Hans Christiansen and Johann H. Karstens. HUBCS thanks Shamil Gantsev. ICICLE thanks Kelly Kohut, Michele Caneppele, Maria Troy. KARMA and SASBAC thank the Swedish Medical Research Counsel. KBCP thanks Eija Myöhänen, Helena Kemiläinen. kConFab/AOCS wish to thank Heather Thorne, Eveline Niedermayr, all the kConFab research nurses and staff, the heads and staff of the Family Cancer Clinics, and the Clinical Follow Up Study (which has received funding from the NHMRC, the National Breast Cancer Foundation, Cancer Australia, and the National Institute of Health (USA)) for their contributions to this resource, and the many families who contribute to kConFab. LMBC thanks Gilian Peuteman, Thomas Van Brussel, EvyVanderheyden and Kathleen Corthouts. MABCS thanks Snezhana Smichkoska, Emilija Lazarova (University Clinic of Radiotherapy and Oncology), Katerina Kubelka-Sabit, Mitko Karadjozov (Adzibadem-Sistina Hospital), Andrej Arsovski and Liljana Stojanovska (Re-Medika Hospital) for their contributions and commitment to this study. MARIE thanks Petra Seibold, Dieter Flesch-Janys, Judith Heinz, Nadia Obi, Alina Vrieling, Sabine Behrens, Ursula Eilber, Muhabbet Celik, Til Olchers and Stefan Nickels. MBCSG (Milan Breast Cancer Study Group): Paolo, Peterlongo, Siranoush Manoukian, Bernard Peissel, Jacopo Azzollini, Dario Zimbalatti, Daniela Zaffaroni, Bernardo Bonanni, Irene Feroce, Mariarosaria Calvello, Aliana Guerrieri Gonzaga, Monica Marabelli, Davide Bondavalli and the personnel of the Cogentech Cancer Genetic Test Laboratory. The MCCS was made possible by the contribution of many people, including the original investigators, the teams that recruited the participants and

continue working on follow-up, and the many thousands of Melbourne residents who continue to participate in the study. We thank the coordinators, the research staff and especially the MMHS participants for their continued collaboration on research studies in breast cancer. MYBRCA thanks study participants and research staff (particularly Patsy Ng, Nurhidayu Hassan, Yoon Sook-Yee, Daphne Lee, Lee Sheau Yee, Phuah Sze Yee and Norhashimah Hassan) for their contributions and commitment to this study. The following are NBCS Collaborators: Anne-Lise Børresen-Dale (Prof. Em.), Kristine K. Sahlberg (PhD), Lars Ottestad (MD), Rolf Kåresen (Prof. Em.) Dr. Ellen Schlichting (MD), Marit Muri Holmen (MD), Toril Sauer (MD), Vilde Haakensen (MD), Olav Engebråten (MD), Bjørn Naume (MD), Alexander Fosså (MD), Cecile E. Kiserud (MD), Kristin V. Reinertsen (MD), Åslaug Helland (MD), Margit Riis (MD), Jürgen Geisler (MD), OSBREAC and Grethe I. Grenaker Alnæs (MSc). NBHS and SBCGS thank study participants and research staff for their contributions and commitment to the studies. OBCS thanks Arja Jukkola-Vuorinen, Mervi Grip, Saira Kauppila, Meeri Otsukka, Leena Keskitalo and Kari Mononen for their contributions to this study. OFBCR thanks Teresa Selander, Nayana Weerasooriya. ORIGO thanks E. Krol-Warmerdam, and J. Blom for patient accrual, administering questionnaires, and managing clinical information. The LUMC survival data were retrieved from the Leiden hospital-based cancer registry system (ONCDOC) with the help of Dr. J. Molenaar. PBCS thanks Louise Brinton, Mark Sherman, Neonila Szeszenia-Dabrowska, Beata Peplonska, Witold Zatonski, Pei Chao, Michael Stagner. The ethical approval for the POSH study is MREC /00/6/69, UKCRN ID: 1137. We thank staff in the Experimental Cancer Medicine Centre (ECMC) supported Faculty of Medicine Tissue Bank and the Faculty of Medicine DNA Banking resource. PREFACE thanks Sonja Oeser and Silke Landrith. PROCAS thanks NIHR for funding. RBCS thanks Jannet Blom, Saskia Pelders, Annette Heemskerk and the Erasmus MC Family Cancer Clinic. SBCS thanks Sue Higham, Helen Cramp, Dan Connley, Ian Brock, Sabapathy Balasubramanian and Malcolm W.R. Reed. We thank the SEARCH and EPIC teams. SGBCC thanks the participants and research coordinator Ms Tan Siew Li. SKKDKFZS thanks all study participants, clinicians, family doctors, researchers and technicians for their contributions and commitment to

this study. We thank the SUCCESS Study teams in Munich, Duessldorf, Erlangen and Ulm. SZBCS thanks Ewa Putresza. UCIBCS thanks Irene Masunaka. We thank the registration team of the Netherlands Comprehensive Cancer Organisation (IKNL) for the collection of data for the Netherlands Cancer Registry as well as IKNL staff for scientific advice.



## Supplemental References

1. Mavaddat, N., Michailidou, K., Dennis, J., Lush, M., Fachal, L., Lee, A., Tyrer, J.P., Chen, T.H., Wang, Q., Bolla, M.K., et al. (2019). Polygenic Risk Scores for Prediction of Breast Cancer and Breast Cancer Subtypes. *American journal of human genetics* 104, 21-34.
2. Kramer, I., Schaapveld, M., Oldenburg, H.S.A., Sonke, G.S., McCool, D., van Leeuwen, F.E., Van de Vijver, K.K., Russell, N.S., Linn, S.C., Siesling, S., et al. (2019). The influence of adjuvant systemic regimens on contralateral breast cancer risk and receptor subtype. *J Natl Cancer Inst.*
3. Mavaddat, N., Pharoah, P.D., Michailidou, K., Tyrer, J., Brook, M.N., Bolla, M.K., Wang, Q., Dennis, J., Dunning, A.M., Shah, M., et al. (2015). Prediction of breast cancer risk based on profiling with common genetic variants. *J Natl Cancer Inst* 107.
4. O'Connell, J., Sharp, K., Shrine, N., Wain, L., Hall, I., Tobin, M., Zagury, J.F., Delaneau, O., and Marchini, J. (2016). Haplotype estimation for Biobank-scale data sets. *Nature genetics* 48, 817-820.
