# Supplementary material
Source: PubMed Central journal article supplement (PMC7675034)
Supplement: mmc4.pdf [file mmc4.pdf]

# Breast Cancer Polygenic Risk Score and Contralateral Breast Cancer Risk

Iris Kramer,<sup>1</sup> Maartje J. Hooning,<sup>2</sup> Nasim Mavaddat,<sup>3</sup> Michael Hauptmann,<sup>4,5</sup> Renske Keeman,<sup>1</sup> Ewout W. Steyerberg,<sup>6,7</sup> Daniele Giardiello,<sup>1,6</sup> Antonis C. Antoniou,<sup>3</sup> Paul D.P. Pharoah,<sup>3,8</sup> Sander Canisius,<sup>1,9</sup> Zumuruda Abu-Ful,<sup>10</sup> Irene L. Andrulis,<sup>11,12</sup> Hoda Anton-Culver,<sup>13</sup> Kristan J. Aronson,<sup>14</sup> Annelie Augustinsson,<sup>15</sup> Heiko Becher,<sup>16,17</sup> Matthias W. Beckmann,<sup>18</sup> Sabine Behrens,<sup>19</sup> Javier Benitez,<sup>20,21</sup> Marina Bermisheva,<sup>22</sup> Natalia V. Bogdanova,<sup>23,24,25</sup> Stig E. Bojesen,<sup>26,27,28</sup> Manjeet K. Bolla,<sup>3</sup> Bernardo Bonanni,<sup>29</sup> Hiltrud Brauch,<sup>30,31,32</sup> Michael Bremer,<sup>23</sup> Sara Y. Brucker,<sup>33</sup> Barbara Burwinkel,<sup>34,35</sup> Jose E. Castelao,<sup>36</sup> Tsun L. Chan,<sup>37,38</sup> Jenny Chang-Claude,<sup>19,39</sup> Stephen J. Chanock,<sup>40</sup> Georgia Chenevix-Trench,<sup>41</sup> Ji-Yeob Choi,<sup>42,43</sup>

(Author list continued on next page)

## Summary

Previous research has shown that polygenic risk scores (PRSs) can be used to stratify women according to their risk of developing primary invasive breast cancer. This study aimed to evaluate the association between a recently validated PRS of 313 germline variants (PRS<sub>313</sub>) and contralateral breast cancer (CBC) risk. We included 56,068 women of European ancestry diagnosed with first invasive breast cancer from 1990 onward with follow-up from the Breast Cancer Association Consortium. Metachronous CBC risk (N = 1,027) according to the distribution of PRS<sub>313</sub> was quantified using Cox regression analyses. We assessed PRS<sub>313</sub> interaction with age at first diagnosis, family history, morphology, ER status, PR status, and HER2 status, and (neo)adjuvant therapy. In studies of Asian women, with limited follow-up, CBC risk associated with PRS<sub>313</sub> was assessed using logistic regression for 340 women with CBC compared with 12,133 women with unilateral breast cancer. Higher PRS<sub>313</sub> was associated with increased CBC risk: hazard ratio per standard deviation (SD) = 1.25 (95%CI = 1.18–1.33) for Europeans, and an OR per SD = 1.15 (95%CI = 1.02–1.29) for Asians. The absolute lifetime risks of CBC, accounting for death as competing risk, were 12.4% for European women at the 10<sup>th</sup> percentile and 20.5% at the 90<sup>th</sup> percentile of PRS<sub>313</sub>. We found no evidence of confounding by or interaction with individual characteristics, characteristics of the primary tumor, or treatment. The C-index for the PRS<sub>313</sub> alone was 0.563 (95%CI = 0.547–0.586). In conclusion, PRS<sub>313</sub> is an independent factor associated with CBC risk and can be incorporated into CBC risk prediction models to help improve stratification and optimize surveillance and treatment strategies.

## Introduction

Due to the high incidence of breast cancer and improving survival, an increasing number of breast cancer survivors are at risk of developing contralateral breast cancer

(CBC). The 10-year cumulative incidence of CBC is ~4%,<sup>1,2</sup> but estimates vary widely depending on factors such as germline genetics, family history, and (neo)adjuvant systemic therapy for the first breast cancer.<sup>3</sup> The risk of developing CBC is particularly high in women with

<sup>1</sup>The Netherlands Cancer Institute - Antoni van Leeuwenhoek Hospital, Division of Molecular Pathology, Amsterdam 1066 CX, the Netherlands; <sup>2</sup>Erasmus MC Cancer Institute, Department of Medical Oncology, Rotterdam 3015 CN, the Netherlands; <sup>3</sup>University of Cambridge, Centre for Cancer Genetic Epidemiology, Department of Public Health and Primary Care, Cambridge CB1 8RN, UK; <sup>4</sup>The Netherlands Cancer Institute - Antoni van Leeuwenhoek Hospital, Department of Epidemiology and Biostatistics, Amsterdam 1066 CX, the Netherlands; <sup>5</sup>Brandenburg Medical School Theodor Fontane, Institute of Biostatistics and Registry Research, Neuruppin 16816, Germany; <sup>6</sup>Leiden University Medical Center, Department of Biomedical Data Sciences, Leiden 2333 ZA, the Netherlands; <sup>7</sup>Erasmus MC, Department of Public Health, Rotterdam 3015 GD, the Netherlands; <sup>8</sup>University of Cambridge, Centre for Cancer Genetic Epidemiology, Department of Oncology, Cambridge CB1 8RN, UK; <sup>9</sup>The Netherlands Cancer Institute - Antoni van Leeuwenhoek Hospital, Division of Molecular Carcinogenesis, Amsterdam 1066 CX, the Netherlands; <sup>10</sup>Carmel Medical Center and Technion Faculty of Medicine, Clalit National Cancer Control Center, Haifa 35254, Israel; <sup>11</sup>Lunenfeld-Tanenbaum Research Institute of Mount Sinai Hospital, Fred A. Litwin Center for Cancer Genetics, Toronto, ON M5G 1X5, Canada; <sup>12</sup>University of Toronto, Department of Molecular Genetics, Toronto, ON M5S 1A8, Canada; <sup>13</sup>University of California Irvine, Department of Epidemiology, Genetic Epidemiology Research Institute, Irvine, CA 92617, USA; <sup>14</sup>Queen's University, Department of Public Health Sciences, and Cancer Research Institute, Kingston, ON K7L 3N6, Canada; <sup>15</sup>Lund University, Department of Cancer Epidemiology, Clinical Sciences, Lund 222 42, Sweden; <sup>16</sup>University Medical Center Hamburg-Eppendorf, Institute of Medical Biometry and Epidemiology, Hamburg 20246, Germany; <sup>17</sup>Charité – Universitätsmedizin Berlin, Institute of Biometry and Clinical Epidemiology, Berlin 10117, Germany; <sup>18</sup>University Hospital Erlangen, Friedrich-Alexander-University Erlangen-Nuremberg, Department of Gynecology and Obstetrics, Comprehensive Cancer Center ER-EMN, Erlangen 91054, Germany; <sup>19</sup>German Cancer Research Center (DKFZ), Division of Cancer Epidemiology, Heidelberg 69120, Germany; <sup>20</sup>Centro de Investigación en Red de Enfermedades Raras (CIBERER), Madrid 28029, Spain; <sup>21</sup>Spanish National Cancer Research Centre (CNIO), Human Cancer Genetics Programme, Madrid 28029, Spain; <sup>22</sup>Ufa Federal Research Centre of the Russian Academy of Sciences, Institute of Biochemistry and Genetics, Ufa 450054, Russia; <sup>23</sup>Hannover Medical School, Department of Radiation Oncology, Hannover 30625, Germany; <sup>24</sup>Hannover Medical School, Gynaecology Research Unit, Hannover 30625, Germany; <sup>25</sup>N.N. Alexandrov Research Institute of Oncology and Medical Radiology, Minsk 223040, Belarus; <sup>26</sup>Copenhagen University Hospital, Copenhagen General Population Study, Herlev and Gentofte Hospital, Herlev 2730, Denmark; <sup>27</sup>Copenhagen University Hospital, Department of Clinical Biochemistry,

(Affiliations continued on next page)

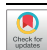

Christine L. Clarke,<sup>44</sup> NBCS Collaborators,<sup>45,46,47,48,49,50,51,52,53,54,55,56</sup> J. Margriet Collée,<sup>57</sup> Fergus J. Couch,<sup>58</sup> Angela Cox,<sup>59</sup> Simon S. Cross,<sup>60</sup> Kamila Czene,<sup>61</sup> Mary B. Daly,<sup>62</sup> Peter Devilee,<sup>63,64</sup> Thilo Dörk,<sup>24</sup> Isabel dos-Santos-Silva,<sup>65</sup> Alison M. Dunning,<sup>8</sup> Miriam Dwek,<sup>66</sup> Diana M. Eccles,<sup>67</sup> D. Gareth Evans,<sup>68,69</sup> Peter A. Fasching,<sup>18,70</sup> Henrik Flyger,<sup>71</sup> Manuela Gago-Dominguez,<sup>72,73</sup> Montserrat García-Closas,<sup>40</sup> José A. García-Sáenz,<sup>74</sup> Graham G. Giles,<sup>75,76,77</sup> David E. Goldgar,<sup>78</sup> Anna González-Neira,<sup>21</sup> Christopher A. Haiman,<sup>79</sup> Niclas Håkansson,<sup>80</sup> Ute Hamann,<sup>81</sup> Mikael Hartman,<sup>82,83</sup> Bernadette A.M. Heemskerk-Gerritsen,<sup>2</sup> Antoinette Hollestelle,<sup>2</sup> John L. Hopper,<sup>76</sup> Ming-Feng Hou,<sup>84</sup> Anthony Howell,<sup>85</sup> ABCTB Investigators,<sup>86</sup> kConFab Investigators<sup>87,88</sup> Hidemi Ito,<sup>89,90</sup> Milena Jakimovska,<sup>91</sup> Anna Jakubowska,<sup>92,93</sup> Wolfgang Janni,<sup>94</sup> Esther M. John,<sup>95</sup> Audrey Jung,<sup>19</sup> Daehee Kang,<sup>42,43,96</sup> C. Marleen Kets,<sup>97</sup> Elza Khusnutdinova,<sup>22,98</sup> Yon-Dschun Ko,<sup>99</sup> Vessela N. Kristensen,<sup>45,56</sup> Allison W. Kurian,<sup>95,100</sup> Ava Kwong,<sup>37,101,102</sup> Diether Lambrechts,<sup>103,104</sup> Loic Le Marchand,<sup>105</sup> Jingmei Li,<sup>106</sup> Annika Lindblom,<sup>107,108</sup> Jan Lubiński,<sup>92</sup> Arto Mannermaa,<sup>109,110,111</sup> Mehdi Manoochehri,<sup>81</sup> Sara Margolin,<sup>112,113</sup> Keitaro Matsuo,<sup>89,90</sup> Dimitrios Mavroudis,<sup>114</sup> Alfons Meindl,<sup>115</sup> Roger L. Milne,<sup>75,76,77</sup> Anna Marie Mulligan,<sup>116,117</sup> Taru A. Muranen,<sup>118</sup> Susan L. Neuhausen,<sup>119</sup> Heli Nevanlinna,<sup>118</sup> William G. Newman,<sup>68,69</sup> Andrew F. Olshan,<sup>120</sup> Janet E. Olson,<sup>121</sup> Håkan Olsson,<sup>15</sup>

(Author list continued on next page)

Herlev and Gentofte Hospital, Herlev 2730, Denmark; <sup>28</sup>University of Copenhagen, Faculty of Health and Medical Sciences, Copenhagen 2200, Denmark; <sup>29</sup>IEO, European Institute of Oncology IRCCS, Division of Cancer Prevention and Genetics, Milan 20141, Italy; <sup>30</sup>Dr. Margarete Fischer-Bosch-Institute of Clinical Pharmacology, Stuttgart 70376, Germany; <sup>31</sup>University of Tübingen, iFIT-Cluster of Excellence, Tübingen 72074, Germany; <sup>32</sup>German Cancer Research Center (DKFZ), German Cancer Consortium (DKTK), Partner Site Tübingen, Tübingen 72074, Germany; <sup>33</sup>University of Tübingen, Department of Gynecology and Obstetrics, Tübingen 72076, Germany; <sup>34</sup>German Cancer Research Center (DKFZ), Molecular Epidemiology Group, C080, Heidelberg 69120, Germany; <sup>35</sup>University of Heidelberg, Molecular Biology of Breast Cancer, University Womens Clinic Heidelberg, Heidelberg 69120, Germany; <sup>36</sup>Instituto de Investigación Sanitaria Galicia Sur (IISGS), Xerencia de Xestión Integrada de Vigo-SERGAS, Oncology and Genetics Unit, Vigo 36312, Spain; <sup>37</sup>Hong Kong Hereditary Breast Cancer Family Registry, Hong Kong; <sup>38</sup>Hong Kong Sanatorium and Hospital, Department of Pathology, Happy Valley, Hong Kong; <sup>39</sup>University Medical Center Hamburg-Eppendorf, Cancer Epidemiology Group, University Cancer Center Hamburg (UCCH), Hamburg 20246, Germany; <sup>40</sup>National Cancer Institute, National Institutes of Health, Department of Health and Human Services, Division of Cancer Epidemiology and Genetics, Bethesda, MD 20850, USA; <sup>41</sup>QIMR Berghofer Medical Research Institute, Department of Genetics and Computational Biology, Brisbane, QLD 4006, Australia; <sup>42</sup>Seoul National University Graduate School, Department of Biomedical Sciences, Seoul 03080, Korea; <sup>43</sup>Seoul National University, Cancer Research Institute, Seoul 03080, Korea; <sup>44</sup>University of Sydney, Westmead Institute for Medical Research, Sydney, NSW 2145, Australia; <sup>45</sup>Oslo University Hospital-Radiumhospitalet, Department of Cancer Genetics, Institute for Cancer Research, Oslo 0379, Norway; <sup>46</sup>University of Oslo, Institute of Clinical Medicine, Faculty of Medicine, Oslo 0450, Norway; <sup>47</sup>Vestre Viken Hospital, Department of Research, Drammen 3019, Norway; <sup>48</sup>Oslo University Hospital-Ullevål, Section for Breast and Endocrine Surgery, Department of Cancer, Division of Surgery, Cancer and Transplantation Medicine, Oslo 0450, Norway; <sup>49</sup>Oslo University Hospital, Department of Radiology and Nuclear Medicine, Oslo 0379, Norway; <sup>50</sup>Akershus University Hospital, Department of Pathology, Lørenskog 1478, Norway; <sup>51</sup>Oslo University Hospital, Department of Tumor Biology, Institute for Cancer Research, Oslo 0379, Norway; <sup>52</sup>Oslo University Hospital-Radiumhospitalet, Department of Oncology, Division of Surgery, Cancer and Transplantation Medicine, Oslo 0379, Norway; <sup>53</sup>Oslo University Hospital-Radiumhospitalet, National Advisory Unit on Late Effects after Cancer Treatment, Department of Oncology, Oslo 0379, Norway; <sup>54</sup>Akershus University Hospital, Department of Oncology, Lørenskog 1478, Norway; <sup>55</sup>Oslo University Hospital, Oslo Breast Cancer Research Consortium, Oslo 0379, Norway; <sup>56</sup>Oslo University Hospital and University of Oslo, Department of Medical Genetics, Oslo 0379, Norway; <sup>57</sup>Erasmus University Medical Center, Department of Clinical Genetics, Rotterdam 3015 CN, the Netherlands; <sup>58</sup>Mayo Clinic, Department of Laboratory Medicine and Pathology, Rochester, MN 55905, USA; <sup>59</sup>University of Sheffield, Sheffield Institute for Nucleic Acids (SiFoNiA), Department of Oncology and Metabolism, Sheffield S10 2TN, UK; <sup>60</sup>University of Sheffield, Academic Unit of Pathology, Department of Neuroscience, Sheffield S10 2TN, UK; <sup>61</sup>Karolinska Institutet, Department of Medical Epidemiology and Biostatistics, Stockholm 171 65, Sweden; <sup>62</sup>Fox Chase Cancer Center, Department of Clinical Genetics, Philadelphia, PA 19111, USA; <sup>63</sup>Leiden University Medical Center, Department of Pathology, Leiden 2333 ZA, the Netherlands; <sup>64</sup>Leiden University Medical Center, Department of Human Genetics, Leiden 2333 ZA, the Netherlands; <sup>65</sup>London School of Hygiene and Tropical Medicine, Department of Non-Communicable Disease Epidemiology, London WC1E 7HT, UK; <sup>66</sup>University of Westminster, School of Life Sciences, London W1B 2HW, UK; <sup>67</sup>University of Southampton, Faculty of Medicine, Southampton SO17 1BJ, UK; <sup>68</sup>University of Manchester, Manchester Academic Health Science Centre, Division of Evolution and Genomic Sciences, School of Biological Sciences, Faculty of Biology, Medicine and Health, Manchester M13 9WL, UK; <sup>69</sup>St Mary's Hospital, Manchester University NHS Foundation Trust, Manchester Academic Health Science Centre, North West Genomics Laboratory Hub, Manchester Centre for Genomic Medicine, Manchester M13 9WL, UK; <sup>70</sup>University of California at Los Angeles, David Geffen School of Medicine, Department of Medicine Division of Hematology and Oncology, Los Angeles, CA 90095, USA; <sup>71</sup>Copenhagen University Hospital, Department of Breast Surgery, Herlev and Gentofte Hospital, Herlev 2730, Denmark; <sup>72</sup>Grupo de Medicina Xenómica, Instituto de Investigación Sanitaria de Santiago de Compostela (IDIS), Fundación Pública Galega de Medicina Xenómica, Santiago de Compostela 15706, Spain; <sup>73</sup>University of California San Diego, Moores Cancer Center, La Jolla, CA 92037, USA; <sup>74</sup>Instituto de Investigación Sanitaria San Carlos (IdISSC), Centro Investigación Biomédica en Red de Cáncer (CIBERONC), Medical Oncology Department, Hospital Clínico San Carlos, Madrid 28040, Spain; <sup>75</sup>Cancer Council Victoria, Cancer Epidemiology Division, Melbourne, VIC 3004, Australia; <sup>76</sup>The University of Melbourne, Centre for Epidemiology and Biostatistics, Melbourne School of Population and Global Health, Melbourne, VIC 3010, Australia; <sup>77</sup>Monash University, Precision Medicine, School of Clinical Sciences at Monash Health, Clayton, VIC 3168, Australia; <sup>78</sup>Huntsman Cancer Institute, University of Utah School of Medicine, Department of Dermatology, Salt Lake City, UT 84112, USA; <sup>79</sup>University of Southern California, Department of Preventive Medicine, Keck School of Medicine, Los Angeles, CA 90033, USA; <sup>80</sup>Karolinska Institutet, Institute of Environmental Medicine, Stockholm 171 77, Sweden; <sup>81</sup>German Cancer Research Center (DKFZ), Molecular Genetics of Breast Cancer, Heidelberg 69120, Germany; <sup>82</sup>National University of Singapore and National University Health System, Saw Swee Hock School of Public Health, Singapore 119077, Singapore; <sup>83</sup>National University Health System, Department of Surgery, Singapore 119228, Singapore; <sup>84</sup>Kaohsiung Medical University, Chung-Ho Memorial Hospital, Kaohsiung 807, Taiwan; <sup>85</sup>University of Manchester, Division of Cancer Sciences, Manchester M13 9PL, UK; <sup>86</sup>University of Sydney, Australian Breast Cancer Tissue Bank, Westmead Institute for Medical Research, Sydney, NSW 2145, Australia; <sup>87</sup>Peter MacCallum Cancer Center, Melbourne, VIC 3000, Australia; <sup>88</sup>The University of Melbourne, Sir Peter MacCallum Department of Oncology, Melbourne, VIC 3000, Australia; <sup>89</sup>Aichi Cancer Center Research Institute, Division of Cancer Epidemiology and Prevention, Nagoya 464-8681, Japan; <sup>90</sup>Nagoya University Graduate School of Medicine, Division of Cancer Epidemiology, Nagoya 466-8550, Japan; <sup>91</sup>MASA, Research Centre for Genetic Engineering and Biotechnology 'Georgi D. Efremov', Skopje 1000, Republic of North Macedonia; <sup>92</sup>Pomeranian Medical

(Affiliations continued on next page)

Tjong-Won Park-Simon,<sup>24</sup> Julian Peto,<sup>65</sup> Christos Petridis,<sup>122</sup> Dijana Plaseska-Karanfilska,<sup>91</sup> Nadege Presneau,<sup>66</sup> Katri Pylkäs,<sup>123,124</sup> Paolo Radice,<sup>125</sup> Gad Rennert,<sup>10</sup> Atocha Romero,<sup>126</sup> Rebecca Roylance,<sup>127</sup> Emmanouil Saloustros,<sup>128</sup> Elinor J. Sawyer,<sup>129</sup> Rita K. Schmutzler,<sup>130,131,132</sup> Lukas Schwentner,<sup>94</sup> Christopher Scott,<sup>121</sup> Mee-Hoong See,<sup>133</sup> Mitul Shah,<sup>8</sup> Chen-Yang Shen,<sup>134,135</sup> Xiao-Ou Shu,<sup>136</sup> Sabine Siesling,<sup>137,138</sup> Susan Slager,<sup>121</sup> Christof Sohn,<sup>139</sup> Melissa C. Southey,<sup>75,77,140</sup> John J. Spinelli,<sup>141,142</sup> Jennifer Stone,<sup>76,143</sup> William J. Tapper,<sup>67</sup> Maria Tengström,<sup>109,144,145</sup> Soo Hwang Teo,<sup>146,147</sup> Mary Beth Terry,<sup>148</sup> Rob A.E.M. Tollenaar,<sup>149</sup> Ian Tomlinson,<sup>150,151</sup> Melissa A. Troester,<sup>120</sup> Celine M. Vachon,<sup>152</sup> Chantal van Ongeval,<sup>153</sup> Elke M. van Veen,<sup>68,69</sup> Robert Winqvist,<sup>123,124</sup> Alicja Wolk,<sup>80,154</sup> Wei Zheng,<sup>136</sup> Argyrios Ziogas,<sup>13</sup> Douglas F. Easton,<sup>3,8</sup> Per Hall,<sup>61,112</sup> and Marjanka K. Schmidt<sup>1,155,\*</sup>

rare mutations in certain genes including *BRCA1*, *BRCA2*, and *CHEK2*, with approximately 2- to 4-fold higher risks reported compared with women without these mutations.<sup>3</sup>

Recently, genome-wide association studies (GWASs) have identified multiple common germline variants that

are associated with first primary breast cancer risk.<sup>4,5</sup> These are associated with small differences in risk individually, but their combined effects can be summarized in a polygenic risk score (PRS), which has been shown to stratify women according to their risk of developing breast cancer.<sup>6–9</sup> Using a large GWAS dataset from the Breast Cancer

University, Department of Genetics and Pathology, Szczecin 71-252, Poland; <sup>93</sup>Pomeranian Medical University, Independent Laboratory of Molecular Biology and Genetic Diagnostics, Szczecin 71-252, Poland; <sup>94</sup>University Hospital Ulm, Department of Gynaecology and Obstetrics, Ulm 89075, Germany; <sup>95</sup>Stanford Cancer Institute, Stanford University School of Medicine, Department of Epidemiology & Population Health, Stanford, CA 94304, USA; <sup>96</sup>Seoul National University College of Medicine, Department of Preventive Medicine, Seoul 03080, Korea; <sup>97</sup>the Netherlands Cancer Institute - Antoni van Leeuwenhoek Hospital, Department of Clinical Genetics, Amsterdam 1066 CX, the Netherlands; <sup>98</sup>Bashkir State University, Department of Genetics and Fundamental Medicine, Ufa 450000, Russia; <sup>99</sup>Johanniter Krankenhaus, Department of Internal Medicine, Evangelische Kliniken Bonn gGmbH, Bonn 53177, Germany; <sup>100</sup>Stanford University School of Medicine, Department of Health Research and Policy, Stanford, CA 94305, USA; <sup>101</sup>The University of Hong Kong, Department of Surgery, Pok Fu Lam, Hong Kong; <sup>102</sup>Hong Kong Sanatorium and Hospital, Cancer Genetics Center and Department of Surgery, Happy Valley, Hong Kong; <sup>103</sup>VIB Center for Cancer Biology, Leuven 3001, Belgium; <sup>104</sup>University of Leuven, Laboratory for Translational Genetics, Department of Human Genetics, Leuven 3000, Belgium; <sup>105</sup>University of Hawaii Cancer Center, Epidemiology Program, Honolulu, HI 96813, USA; <sup>106</sup>Genome Institute of Singapore, Human Genetics Division, Singapore 138672, Singapore; <sup>107</sup>Karolinska Institutet, Department of Molecular Medicine and Surgery, Stockholm 171 76, Sweden; <sup>108</sup>Karolinska University Hospital, Department of Clinical Genetics, Stockholm 171 76, Sweden; <sup>109</sup>University of Eastern Finland, Translational Cancer Research Area, Kuopio 70210, Finland; <sup>110</sup>University of Eastern Finland, Institute of Clinical Medicine, Pathology and Forensic Medicine, Kuopio 70210, Finland; <sup>111</sup>Kuopio University Hospital, Biobank of Eastern Finland, Kuopio 70210, Finland; <sup>112</sup>Södersjukhuset, Department of Oncology, Stockholm 118 83, Sweden; <sup>113</sup>Karolinska Institutet, Department of Clinical Science and Education, Södersjukhuset, Stockholm 118 83, Sweden; <sup>114</sup>University Hospital of Heraklion, Department of Medical Oncology, Heraklion 711 10, Greece; <sup>115</sup>University of Munich, Campus Großhadern, Department of Gynecology and Obstetrics, Munich 81377, Germany; <sup>116</sup>University of Toronto, Department of Laboratory Medicine and Pathobiology, Toronto, ON M5S 1A8, Canada; <sup>117</sup>University Health Network, Laboratory Medicine Program, Toronto, ON M5G 2C4, Canada; <sup>118</sup>Helsinki University Hospital, Department of Obstetrics and Gynecology, University of Helsinki, Helsinki 00290, Finland; <sup>119</sup>Beckman Research Institute of City of Hope, Department of Population Sciences, Duarte, CA 91010, USA; <sup>120</sup>University of North Carolina at Chapel Hill, Department of Epidemiology, Gillings School of Global Public Health and UNC Lineberger Comprehensive Cancer Center, Chapel Hill, NC 27599, USA; <sup>121</sup>Mayo Clinic, Department of Health Sciences Research, Rochester, MN 55905, USA; <sup>122</sup>King's College London, Research Oncology, Guy's Hospital, London SE1 9RT, UK; <sup>123</sup>University of Oulu, Laboratory of Cancer Genetics and Tumor Biology, Cancer and Translational Medicine Research Unit, Biocenter Oulu, Oulu 90220, Finland; <sup>124</sup>Northern Finland Laboratory Centre Oulu, Laboratory of Cancer Genetics and Tumor Biology, Oulu 90220, Finland; <sup>125</sup>Fondazione IRCCS Istituto Nazionale dei Tumori (INT), Unit of Molecular Bases of Genetic Risk and Genetic Testing, Department of Research, Milan 20133, Italy; <sup>126</sup>Hospital Universitario Puerta de Hierro, Medical Oncology Department, Madrid 28222, Spain; <sup>127</sup>UCLH Foundation Trust, Department of Oncology, London NW1 2PG, UK; <sup>128</sup>University Hospital of Larissa, Department of Oncology, Larissa 411 10, Greece; <sup>129</sup>King's College London, School of Cancer & Pharmaceutical Sciences, Comprehensive Cancer Centre, Guy's Campus, London SE1 1UL, UK; <sup>130</sup>Faculty of Medicine and University Hospital Cologne, University of Cologne, Center for Familial Breast and Ovarian Cancer, Cologne 50937, Germany; <sup>131</sup>Faculty of Medicine and University Hospital Cologne, University of Cologne, Center for Integrated Oncology (CIO), Cologne 50937, Germany; <sup>132</sup>Faculty of Medicine and University Hospital Cologne, University of Cologne, Center for Molecular Medicine Cologne (CMMC), Cologne 50931, Germany; <sup>133</sup>University of Malaya, Breast Cancer Research Unit, University Malaya Cancer Research Institute, Faculty of Medicine, Kuala Lumpur 50603, Malaysia; <sup>134</sup>Academia Sinica, Institute of Biomedical Sciences, Taipei 115, Taiwan; <sup>135</sup>China Medical University, School of Public Health, Taichung 40402, Taiwan; <sup>136</sup>Vanderbilt University School of Medicine, Division of Epidemiology, Department of Medicine, Vanderbilt Epidemiology Center, Vanderbilt-Ingram Cancer Center, Nashville, TN 37232, USA; <sup>137</sup>Netherlands Comprehensive Cancer Organisation (IKNL), Department of Research, Utrecht 3511 DT, the Netherlands; <sup>138</sup>University of Twente, Department of Health Technology and Service Research, Technical Medical Center, Enschede 7522 NB, the Netherlands; <sup>139</sup>University Hospital and German Cancer Research Center, National Center for Tumor Diseases, Heidelberg 69120, Germany; <sup>140</sup>The University of Melbourne, Department of Clinical Pathology, Melbourne, VIC 3010, Australia; <sup>141</sup>BC Cancer, Population Oncology, Vancouver, BC V5Z 1G1, Canada; <sup>142</sup>University of British Columbia, School of Population and Public Health, Vancouver, BC V6T 1Z4, Canada; <sup>143</sup>Curtin University and University of Western Australia, The Curtin UWA Centre for Genetic Origins of Health and Disease, Perth, WA 6000, Australia; <sup>144</sup>Kuopio University Hospital, Department of Oncology, Cancer Center, Kuopio 70210, Finland; <sup>145</sup>University of Eastern Finland, Institute of Clinical Medicine, Oncology, Kuopio 70210, Finland; <sup>146</sup>Cancer Research Malaysia, Breast Cancer Research Programme, Subang Jaya, Selangor 47500, Malaysia; <sup>147</sup>University of Malaya, Department of Surgery, Faculty of Medicine, Kuala Lumpur 50603, Malaysia; <sup>148</sup>Columbia University, Department of Epidemiology, Mailman School of Public Health, New York, NY 10032, USA; <sup>149</sup>Leiden University Medical Center, Department of Surgery, Leiden 2333 ZA, the Netherlands; <sup>150</sup>University of Birmingham, Institute of Cancer and Genomic Sciences, Birmingham B15 2TT, UK; <sup>151</sup>University of Oxford, Wellcome Trust Centre for Human Genetics and Oxford NIHR Biomedical Research Centre, Oxford OX3 7BN, UK; <sup>152</sup>Mayo Clinic, Department of Health Science Research, Division of Epidemiology, Rochester, MN 55905, USA; <sup>153</sup>Leuven Cancer Institute, University Hospitals Leuven, Leuven Multidisciplinary Breast Center, Department of Radiology, Leuven 3000, Belgium; <sup>154</sup>Uppsala University, Department of Surgical Sciences, Uppsala 751 05, Sweden; <sup>155</sup>The Netherlands Cancer Institute - Antoni van Leeuwenhoek hospital, Division of Psychosocial Research and Epidemiology, Amsterdam 1066 CX, the Netherlands

\*Correspondence: [mk.schmidt@nki.nl](mailto:mk.schmidt@nki.nl)  
<https://doi.org/10.1016/j.ajhg.2020.09.001>

Association Consortium (BCAC), we previously developed and validated a 313-variant PRS (PRS<sub>313</sub>) among women of European descent. In independent prospective studies, this PRS<sub>313</sub> predicted the risk of primary invasive breast cancer with an odds ratio (OR) per standard deviation (SD) of 1.61 (95% confidence interval (95%CI) = 1.57–1.65).<sup>7</sup> The PRS<sub>313</sub> has also been externally validated using the UK Biobank cohort.

The aim of the current study was to evaluate the association between PRS<sub>313</sub> and CBC risk, using data from BCAC. Other studies have shown associations between risk of CBC and both a 67-variant PRS<sup>10</sup> and individual variants,<sup>11</sup> but not yet with PRS<sub>313</sub>, the most extensively validated PRS. Further, the dataset currently evaluated is larger than those previously tested. We carried out two types of analyses. We conducted a cohort study among studies of European ancestry women with follow-up data available and performed Cox regression analyses to estimate hazard ratios (HRs) for CBC. Potential confounding and interaction with characteristics of the individual, characteristics of the primary tumor, or treatment were tested. In addition, to directly compare with the OR reported for PRS<sub>313</sub> and first breast cancer, we selected case-case series and performed logistic regression analyses comparing the PRS<sub>313</sub> distribution in women with CBC versus those with unilateral breast cancer. These analyses were conducted separately in European and Asian women (follow-up was too limited to perform a cohort study for the Asian population). Use of PRS<sub>313</sub> may lead to more accurate CBC risk prediction to support decision making for women who may or may not benefit from additional surveillance and risk-reducing treatment strategies.

## Material and Methods

### Study Subjects

#### Case-Case Series

We selected women who were diagnosed with breast cancer and women without any diagnosis of breast cancer from the BCAC including all women of European ancestry, based on genotyping data, and selecting only those studies which reported on CBC (62 studies) (Figure S1A, Table S1 and S2). BCAC database version freeze 12 was used. All women diagnosed with invasive breast cancer as a first cancer were included in the analysis; the small number of tumors with unknown invasiveness were considered invasive (Table S2). In the case-case series, a CBC was defined as a breast cancer (*in situ* or invasive) in the contralateral breast irrespective of the time since the first breast cancer. The case-case series comprised 81,000 women with unilateral breast cancer, 3,607 women with CBC, and 62,830 women without any diagnosis of breast cancer (Figure S1A). We also compared women with unilateral breast cancer to women without any diagnosis of breast cancer to reproduce the estimate that was previously reported for first breast cancer risk<sup>7</sup> in our study selection.

We selected for a separate analysis women of Asian ancestry from the BCAC data, comprising 12,133 women with unilateral breast cancer, 340 women with CBC, and 13,398 women without

any diagnosis of breast cancer from eight studies (Figure S1B, Table S2).

#### European Cohort

In the European cohort, we used metachronous CBC as the outcome, defined as a breast cancer in the contralateral breast (*in situ* or invasive) diagnosed at least 3 months after the first breast cancer. We used a cut-off of 3 months to reduce the likelihood that these CBCs represent metastases rather than true second primary tumors. We selected all women diagnosed with breast cancer from the European case-case series and excluded four studies that did not provide follow-up information on vital status (Figure S1A). We did not include Asian women since follow-up was too limited in these studies. We additionally excluded 6,207 women with no follow-up and 2,208 women who developed synchronous CBC, distant metastasis, or who died or were last known to be alive within 3 months after the first breast cancer diagnosis. Since BCAC also included prevalent cases, we excluded 3,796 women who developed CBC or were censored before study entry. The case-case series included women diagnosed between 1947 and 2018. In the European cohort, we excluded 2,235 women who were diagnosed with their first breast cancer before 1990 or who had missing year of first diagnosis. We restricted to women diagnosed from 1990 onward so that diagnostic procedures and treatment would be more representative of current practice. Moreover, clinico-pathological, treatment, and follow-up data were more complete after 1990. In addition, we excluded 16 studies (9,783 women) without information about metachronous CBC events (Figure S1A). After these exclusions, the cohort for this analysis comprised data from 42 studies, including 56,068 women with invasive breast cancer among whom 1,027 metachronous CBC occurred (Table S2).

All individuals provided written informed consent, and all studies were approved by the relevant institutional review boards. BCAC data were centrally harmonized and cleaned in communication with the study data managers and principal investigators. Data collection for individual studies is described in Table S1.

### Genotyping and PRSs

DNA samples from participants were genotyped using the iCOGS array<sup>12,13</sup> or the OncoArray,<sup>4,14</sup> with genotypes for variants not on the arrays estimated by imputation.<sup>4,13</sup> The PRS<sub>313</sub> was calculated as a weighted sum of the minor allele dosages; the variant selection and weights are as given by Mavaddat et al.<sup>7</sup> We also calculated estimates for a previously published PRS<sub>77</sub><sup>6</sup> and for estrogen receptor (ER)-specific PRSs (ER-positive PRS<sub>313</sub> and ER-negative PRS<sub>313</sub>).<sup>7</sup> The ER-specific PRSs were constructed by defining subtype-specific weights for the 313 variants using a hybrid approach.<sup>7</sup> Variants and corresponding coefficients used to construct the PRS are shown in Table S3. We standardized the PRS in our analyses by dividing it by the SD of the PRS of the control subjects (PRS<sub>77</sub> SD = 0.45; PRS<sub>313</sub> SD = 0.61; ER-positive PRS<sub>313</sub> SD = 0.65; ER-negative PRS<sub>313</sub> SD = 0.59) exactly as was done in the analyses of the PRS and first breast cancer risk.<sup>6,7</sup> This allows a direct comparison of the magnitude of the CBC relative risk estimation to that of the first breast cancer.

For samples genotyped with both OncoArray and iCOGS array (9,071 samples), OncoArray data were used in preference as the imputation quality was generally higher. The intraclass correlation coefficient (ICC) between the PRSs derived from the two platforms was 0.99 (95%CI = 0.99–0.99) for the PRS<sub>77</sub> and 0.96 (95%CI = 0.95–0.96) for PRS<sub>313</sub> (Figure S2). Given the high correlation

between the two platforms, PRS measures from both platforms were used in the analyses without adjustment.

## Statistical Analysis

### European Cohort

The primary outcome in the European cohort was the development of metachronous CBC. Cox proportional hazards models were used to estimate HRs for metachronous CBC risk by PRS, stratified by country. Since previous studies have shown that age at first breast cancer diagnosis is an important predictor of CBC,<sup>3</sup> the analyses were performed with attained age as the timescale. Time at risk started 3 months after the first breast cancer diagnosis and ended at the age of CBC diagnosis, distant metastasis (where available), death, or end of follow-up, whichever came first. For women who had a study entry more than 3 months after first breast cancer diagnosis, follow-up started at the age of study entry. We also performed a fixed-effect meta-analysis of country-specific effects using the STATA command *metan*. We performed a fixed-effect meta-analysis over a random-effect meta-analysis since there was no evidence for heterogeneity in effect sizes between countries (I-squared = 0%, Figure S3). For some analyses, only invasive CBC was used as the outcome; in these analyses we censored on *in situ* CBC. Separate analyses were conducted for ER-positive CBC (censored on ER-negative and ER-unknown CBC) and ER-negative CBC (censored on ER-positive and ER-unknown CBC).

We evaluated the linearity of the association between PRS<sub>313</sub> per unit SD and CBC risk using restricted cubic splines with three knots. There was no evidence for violation of the linearity assumption. Therefore, in the main analysis, the PRS<sub>313</sub> was treated as a continuous covariate, and estimated the HR per unit SD of the PRS<sub>313</sub>. Violation of the proportional hazard assumption was assessed by inspection of the Schoenfeld residuals.<sup>15</sup> As a second analysis, we used the per SD log HR of the PRS<sub>313</sub> to calculate the predicted HR at different percentiles of the PRS<sub>313</sub>, compared to the 50<sup>th</sup> percentile. Third, the PRS<sub>313</sub> was categorized into percentile groups (0<sup>th</sup> to 10<sup>th</sup>, 10<sup>th</sup> to 20<sup>th</sup>, 20<sup>th</sup> to 40<sup>th</sup>, 40<sup>th</sup> to 60<sup>th</sup>, 60<sup>th</sup> to 80<sup>th</sup>, 80<sup>th</sup> to 90<sup>th</sup>, 90<sup>th</sup> to 100<sup>th</sup>) to illustrate the differences between PRS<sub>313</sub> subgroups, with the middle quintile (40<sup>th</sup> to 60<sup>th</sup>) as the reference.

We also performed multivariable Cox regression analyses to determine whether the log HR of CBC risk by PRS changed when adjusting for year of first breast cancer diagnosis, family history of breast cancer in a first degree relative, and several clinical characteristics of the first breast cancer such as nodal status, tumor size, morphology, ER status, progesterone receptor (PR) status, human epidermal growth factor receptor 2 (HER2) status, (neo) adjuvant chemotherapy, adjuvant endocrine therapy, and radiotherapy. These analyses were performed in all women, a complete case set (excluding those with unknown values for the covariates), and in a set excluding studies oversampling case subjects with family history. Potential effect modification of the PRS<sub>313</sub> effect by the same variables was evaluated by fitting interaction terms in different models using complete case sets, including the standardized PRS<sub>313</sub>, modifier, and interaction.

The discriminative ability of different models (model 1: PRS<sub>313</sub> alone; model 2: other risk factors [the adjustment variables from the multivariable Cox regression analyses]; model 3: PRS<sub>313</sub> + other risk factors) was calculated using Harrell's C-index.<sup>16</sup> Since no standard performance measures are currently available to account for left-truncated follow-up time (i.e., to start analyses at

age at study entry), we used time since first breast cancer as the timescale to calculate the C-index.

### Absolute Risks

Absolute risks of developing CBC at PRS<sub>313</sub> percentiles were calculated using the estimated log HRs per SD from the breast cancer cohort (BCAC) under the log-linear model, assuming the PRS is normally distributed. The PRS<sub>313</sub> and age-specific incidences were constrained to the age-specific CBC incidences from women diagnosed with a first invasive breast cancer in the period 2003–2010 from the Netherlands Cancer Registry (NCR).<sup>1</sup> The procedure for constraining the incidences has been previously described.<sup>17</sup> The age-specific CBC incidences were calculated overall and for age-specific groups, censoring on death and distant metastasis. We used data from the NCR since this registry has complete coverage of all newly diagnosed cancers in the Netherlands. The NCR cohort included all females aged  $\geq 18$  years and follow-up for second cancers was complete until February 1, 2016.<sup>1</sup> We then applied the competing risk of dying on the absolute CBC risks. The absolute CBC risk ( $AR_g$ ) by age  $t$  in PRS<sub>313</sub> category  $g$ , taking into account the competing risk of dying was calculated by:

$$AR_g(t) = \sum_{u=0}^{t-1} \mu_g(u) S_g(u) S_m(u)$$

where  $\mu_g(t)$  is the CBC incidence associated with PRS<sub>313</sub> category  $g$ ,  $S_g(t)$  the probability of being free of CBC to age  $t$ , and  $S_m(t)$  the probability of surviving to age  $t$ .

### Case-Case Series

For the case-case series (European and Asian), logistic regression models were used to estimate the ORs for CBC risk (comparing with unilateral breast cancer) and for unilateral breast cancer risk (comparing with women without any diagnosis of breast cancer) associated with PRS<sub>313</sub>. All analyses were adjusted for age and country (Table S1). For all unilateral- and contralateral breast cancer patients, we used age at first breast cancer diagnosis, and for women without any diagnosis of breast cancer we used age at baseline questionnaire.

For direct comparison with the estimate reported for PRS<sub>313</sub> and first breast cancer, we also performed logistic regression analyses in the same BCAC study participants included in the validation of the association between PRS<sub>313</sub> and first breast cancer.<sup>7</sup> This validation set comprised a subsample from 24 studies and included 3,781 women with unilateral breast cancer, 94 women with CBC, and 3,753 women without any diagnosis of breast cancer (Table S2). For this analysis, we adjusted for 10 principal components, in line with Mavaddat et al.<sup>7</sup>

For European women who had follow-up time available more than 3 months after the first breast cancer diagnosis, a sensitivity analysis was performed for metachronous CBC (1,702 CBCs). We also did a separate analysis for invasive CBC (N = 3,246), by excluding CBC *in situ*.

All p values are two sided; tests with  $p < .05$  are referred to as statistically significant. Analyses were performed using STATA, v.13.1 (StataCorp) and R v.3.3.2.

## Results

### European (Cohort) Cox Regression Analyses

The European cohort included 56,068 women diagnosed with first invasive breast cancer with 1,027 metachronous CBC events. Median follow-up was 8.4 years. Patient, tumor, and treatment characteristics are summarized in Table S4.

**Table 1. Association between PRSs and Contralateral Breast Cancer Risk in the European Cohort (N = 56,068)**

| Polygenic Risk Score (PRS)                         | No. of CBC | HR per Unit SD <sup>a</sup> | 95%CI     | p Value |
|----------------------------------------------------|------------|-----------------------------|-----------|---------|
| <b>PRS<sub>77</sub><sup>b</sup></b>                |            |                             |           |         |
| All CBC                                            | 1,027      | 1.21                        | 1.14–1.29 | <.001   |
| Invasive CBC                                       | 923        | 1.21                        | 1.13–1.29 | <.001   |
| <b>PRS<sub>313</sub><sup>b</sup></b>               |            |                             |           |         |
| All CBC                                            | 1,027      | 1.25                        | 1.18–1.33 | <.001   |
| Invasive CBC                                       | 923        | 1.24                        | 1.16–1.32 | <.001   |
| ER-positive invasive CBC <sup>d</sup>              | 275        | 1.38                        | 1.23–1.55 | <.001   |
| ER-negative invasive CBC <sup>d</sup>              | 97         | 0.92                        | 0.75–1.12 | .39     |
| <b>ER-Positive PRS<sub>313</sub><sup>b,c</sup></b> |            |                             |           |         |
| All CBC                                            | 1,027      | 1.23                        | 1.16–1.31 | <.001   |
| Invasive CBC                                       | 923        | 1.22                        | 1.15–1.30 | <.001   |
| ER-positive invasive CBC <sup>d</sup>              | 275        | 1.37                        | 1.22–1.54 | <.001   |
| <b>ER-Negative PRS<sub>313</sub><sup>b,c</sup></b> |            |                             |           |         |
| All CBC                                            | 1,027      | 1.25                        | 1.17–1.33 | <.001   |
| Invasive CBC                                       | 923        | 1.24                        | 1.16–1.33 | <.001   |
| ER-negative invasive CBC <sup>d</sup>              | 97         | 1.06                        | 0.86–1.30 | .58     |

Abbreviations: PRS, polygenic risk score; No., number; CBC, contralateral breast cancer; HR, hazard ratio; CI, confidence interval; ER, estrogen receptor; SD, standard deviation.

<sup>a</sup>All analyses were performed with attained age as timescale.

<sup>b</sup>Coefficients to construct the PRSs are shown in Table S3. All PRSs were standardized by the same SD as was used by Mavaddat et al.<sup>7</sup> The SD was 0.45 for overall breast cancer PRS<sub>77</sub>, 0.61 for overall breast cancer PRS<sub>313</sub>, 0.65 for ER-positive PRS<sub>313</sub>, and 0.59 for ER-negative PRS<sub>313</sub>.

<sup>c</sup>ER-specific PRSs were constructed using a hybrid method, as described by Mavaddat et al.<sup>7</sup>

<sup>d</sup>Women with ER-unknown CBC (N = 551) were censored in these analyses.

The associations between the different PRSs and CBC risk are shown in Table 1. The HR for CBC per SD of PRS<sub>313</sub> was 1.25 (95%CI = 1.18–1.33). For comparison, the HR per SD for PRS<sub>77</sub> was 1.21 (95%CI = 1.14–1.29). Women within the 0<sup>th</sup> to 10<sup>th</sup> and the 90<sup>th</sup> to 100<sup>th</sup> percentile of the PRS<sub>313</sub> had 0.59-fold (95%CI = 0.45–0.78) and 1.38-fold (95%CI = 1.13–1.69) risk of CBC, respectively, compared with women within the 40<sup>th</sup> to 60<sup>th</sup> percentile (Figure 1, Table S5). The predicted HRs of CBC for women at the 10<sup>th</sup> and 90<sup>th</sup> percentile of the PRS<sub>313</sub> were 0.75 and 1.33, respectively, compared to the 50<sup>th</sup> percentile (Figure 1). Since we observed evidence of departure from the proportional hazards assumption ( $p = 0.02$ ),<sup>15</sup> we also calculated HRs stratified for follow-up duration (<5 and ≥5 years). The HR by SD of the PRS<sub>313</sub> was 1.21 (95%CI = 1.10–1.32) for CBC diagnosed ≤5 years after first breast cancer diagnosis (CBC N = 428) and 1.28 (95%CI = 1.18–1.38) for CBC diagnosed >5 years after first diagnosis (CBC N = 599).

The HR per SD of PRS<sub>313</sub> for ER-positive invasive CBC was 1.38 (95%CI = 1.23–1.55) compared to a HR per SD

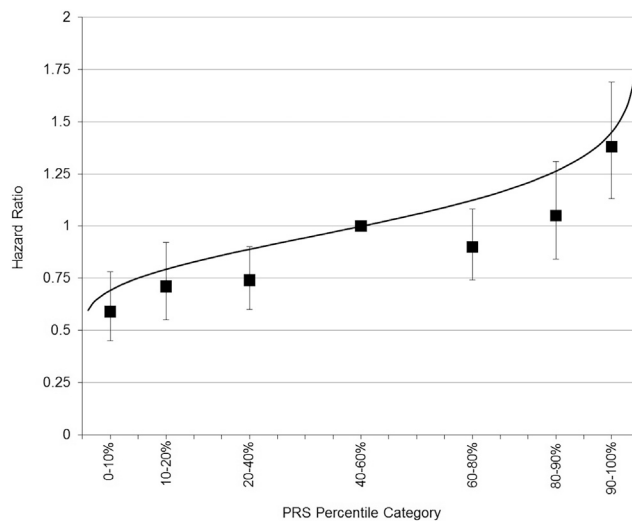

**Figure 1. Estimates for Contralateral Breast Cancer Risk by Percentile Categories of the 313-Variant PRS (PRS<sub>313</sub>)**

The figure shows the hazard ratios per SD and 95% confidence intervals for percentiles of the PRS<sub>313</sub> relative to the middle quintile (underlying table can be found in Table S5). The solid line denotes the estimates for contralateral breast cancer risk with the PRS<sub>313</sub> fitted as a continuous covariate. Coefficients to construct the PRS<sub>313</sub> are shown in Table S3. The PRS<sub>313</sub> was standardized by SD = 0.61, in line with Mavaddat et al.<sup>7</sup> The analyses were performed with attained age as timescale. PRS, polygenic risk score; SD, standard deviation.

of the ER-positive PRS<sub>313</sub> of 1.37 (95%CI = 1.22–1.54) (Table 1). For ER-negative invasive CBC, the HR per SD was 0.92 (95%CI = 0.75–1.12) for PRS<sub>313</sub> and 1.06 (95%CI = 0.86–1.30) for the ER-negative PRS<sub>313</sub>.

Sensitivity analysis using the overall PRS<sub>313</sub> showed a HR per SD of 1.24 (95%CI = 1.16–1.32) for invasive CBC risk. When we used time since first breast cancer as the timescale, we found similar results (HR per SD = 1.25, 95%CI = 1.18–1.33). Meta-analysis of country-specific effects showed a HR per SD of 1.25 (95%CI = 1.18–1.33) for CBC risk by PRS<sub>313</sub> (Figure S3).

The association between the PRS<sub>313</sub> and CBC risk did not change when adjusting for characteristics of the individual, tumor, or treatment, nor when excluding studies oversampling case subjects with a family history (Table S6). When considering potential modifiers of the effect of the PRS<sub>313</sub> on CBC risk (Table 2), we found that the HR was the lowest in women aged <40 years at first breast cancer diagnosis (HR per SD = 1.13; 95%CI = 0.98–1.31) and tended to increase with age, although these effects were not statistically significant ( $P_{\text{heterogeneity}} = 0.26$ ;  $P_{\text{trend}} = 0.05$ ). We found no indication for effect modification by family history ( $P_{\text{heterogeneity}} = 0.63$ ), morphology ( $P_{\text{heterogeneity}} = 0.14$ ), ER status ( $P_{\text{heterogeneity}} = 0.13$ ), PR status ( $p = 0.26$ ), HER2 status ( $P_{\text{heterogeneity}} = 0.42$ ), chemotherapy ( $P_{\text{heterogeneity}} = 0.60$ ), endocrine therapy ( $P_{\text{heterogeneity}} = 0.79$ ), or radiotherapy ( $P_{\text{heterogeneity}} = 0.40$ ) (Table 2).

The C-index was 0.563 (95%CI = 0.547–0.586) for the model only including PRS<sub>313</sub>, 0.605 (95%CI = 0.591–0.629)

**Table 2. Association between the 313-Variant PRS (PRS<sub>313</sub>) and Contralateral Breast Cancer Risk for Subgroups**

| Subgroups                                           | No. of Patients | No. of CBC | HR per Unit SD <sup>a,b</sup> | 95%CI     | p Value | P <sub>hetero-geneity</sub> <sup>c,d</sup> | P <sub>trend</sub> <sup>c,e</sup> |
|-----------------------------------------------------|-----------------|------------|-------------------------------|-----------|---------|--------------------------------------------|-----------------------------------|
| All patients                                        | 56,068          | 1,027      | 1.25                          | 1.18–1.33 | <.001   | -                                          | -                                 |
| <b>Age at First Breast Cancer Diagnosis (Years)</b> |                 |            |                               |           |         | <b>.26</b>                                 | <b>.05</b>                        |
| <40                                                 | 5,877           | 171        | 1.13                          | 0.98–1.31 | .09     |                                            |                                   |
| 40–49                                               | 11,928          | 265        | 1.25                          | 1.11–1.41 | <.001   |                                            |                                   |
| 50–59                                               | 16,882          | 320        | 1.22                          | 1.09–1.36 | <.001   |                                            |                                   |
| 60+                                                 | 21,381          | 271        | 1.36                          | 1.21–1.52 | <.001   |                                            |                                   |
| <b>Family History (First Degree Relative)</b>       |                 |            |                               |           |         | <b>.63</b>                                 | -                                 |
| No                                                  | 33,623          | 618        | 1.26                          | 1.16–1.36 | <.001   |                                            |                                   |
| Yes                                                 | 10,369          | 302        | 1.22                          | 1.09–1.36 | <.001   |                                            |                                   |
| <b>Morphology</b>                                   |                 |            |                               |           |         | <b>.14</b>                                 | -                                 |
| Ductal                                              | 37,324          | 621        | 1.21                          | 1.12–1.31 | <.001   |                                            |                                   |
| Lobular                                             | 5,878           | 118        | 1.32                          | 1.10–1.59 | .002    |                                            |                                   |
| Mixed (ductal and lobular)                          | 2,174           | 46         | 1.52                          | 1.15–2.02 | .004    |                                            |                                   |
| Other                                               | 3,344           | 70         | 1.20                          | 0.96–1.50 | .11     |                                            |                                   |
| <b>ER Status</b>                                    |                 |            |                               |           |         | <b>.13</b>                                 | -                                 |
| Negative                                            | 9,527           | 194        | 1.13                          | 0.98–1.30 | .08     |                                            |                                   |
| Positive                                            | 38,090          | 670        | 1.28                          | 1.19–1.38 | <.001   |                                            |                                   |
| <b>PR Status</b>                                    |                 |            |                               |           |         | <b>.26</b>                                 | -                                 |
| Negative                                            | 13,098          | 244        | 1.16                          | 1.03–1.32 | .02     |                                            |                                   |
| Positive                                            | 27,044          | 554        | 1.27                          | 1.17–1.38 | <.001   |                                            |                                   |
| <b>HER2 Status</b>                                  |                 |            |                               |           |         | <b>.42</b>                                 | -                                 |
| Negative                                            | 23,787          | 352        | 1.29                          | 1.17–1.44 | <.001   |                                            |                                   |
| Positive                                            | 4,969           | 60         | 1.45                          | 1.13–1.85 | .004    |                                            |                                   |
| <b>(Neo)adjuvant Chemotherapy</b>                   |                 |            |                               |           |         | <b>.60</b>                                 | -                                 |
| No                                                  | 18,110          | 361        | 1.28                          | 1.16–1.42 | <.001   |                                            |                                   |
| Yes                                                 | 18,559          | 363        | 1.24                          | 1.12–1.37 | <.001   |                                            |                                   |
| <b>(Neo)adjuvant Endocrine Therapy</b>              |                 |            |                               |           |         | <b>.79</b>                                 | -                                 |
| No                                                  | 10,781          | 242        | 1.28                          | 1.13–1.44 | <.001   |                                            |                                   |
| Yes                                                 | 27,322          | 460        | 1.30                          | 1.19–1.43 | <.001   |                                            |                                   |
| <b>Radiotherapy</b>                                 |                 |            |                               |           |         | <b>.40</b>                                 | -                                 |
| No                                                  | 11,023          | 188        | 1.33                          | 1.15–1.53 | <.001   |                                            |                                   |
| Yes                                                 | 29,142          | 617        | 1.24                          | 1.15–1.34 | <.001   |                                            |                                   |

Abbreviations: PRS, polygenic risk score; No., number; CBC, contralateral breast cancer; HR, hazard ratio; CI, confidence interval; ER, estrogen receptor; PR, progesterone receptor; HER2, human epidermal growth factor receptor 2.

<sup>a</sup>HR for CBC risk by unit SD of PRS<sub>313</sub>. All analyses were performed with attained age as timescale.

<sup>b</sup>Coefficients to construct the PRS<sub>313</sub> are shown in Table S3. The PRS<sub>313</sub> was standardized by standard deviation = 0.61, in line with Mavaddat et al.<sup>7</sup>

<sup>c</sup>The interaction between the PRS<sub>313</sub> and each subgroup was tested in different models including the standardized PRS<sub>313</sub>, modifier, and interaction. Patients with unknown values were excluded from these analyses. Since attained age was used as timescale in all models, the model with age at first breast cancer only included the PRS<sub>313</sub> and interaction.

<sup>d</sup>P for interaction based on test for heterogeneity across categories.

<sup>e</sup>P for interaction based on a trend test with age as continuous variable.

for the model only including other risk factors, and 0.623 (95%CI = 0.608–0.645) for the complete model (Table 3).

#### Absolute Risks

Based on the HR estimates for PRS<sub>313</sub>, the predicted CBC risk by age 80 years was 12.4% at the 10<sup>th</sup> percentile of

**Table 3. Discriminatory Ability (C-Index) of the 313-Variant PRS (PRS<sub>313</sub>) and Other Risk Factors for Contralateral Breast Cancer Risk in the European Cohort**

|                                                                            | C-Index (95%CI) <sup>a,b</sup> |
|----------------------------------------------------------------------------|--------------------------------|
| Model 1: PRS <sub>313</sub> <sup>c</sup> alone                             | 0.563 (0.547–0.586)            |
| Model 2: Other risk factors <sup>d</sup>                                   | 0.605 (0.591–0.629)            |
| Model 3: PRS <sub>313</sub> <sup>c</sup> + other risk factors <sup>d</sup> | 0.623 (0.608–0.645)            |

Abbreviations: PRS, polygenic risk score; CI, confidence interval.

<sup>a</sup>The Harrell's C-index was obtained by the STATA `stcox` postestimation command "estat concordance," using time since first breast cancer on the time-scale without taking delayed entry (prevalent cases) into account. We did not consider delayed entry since no standard performance measures are currently available in the statistical literature to account for left-truncated follow-up time. The median of delayed entry was 0.4 years (standard deviation = 2.7) in our study.

<sup>b</sup>The 95% CIs were obtained by use of the `somersd` package in STATA.

<sup>c</sup>Coefficients to construct the PRS<sub>313</sub> are shown in Table S3. The PRS<sub>313</sub> was standardized by SD = 0.61, in line with Mavaddat et al.<sup>7</sup>

<sup>d</sup>Including age at first diagnosis, year of first diagnosis, family history for breast cancer in a first degree relative, and clinical characteristics of the first breast cancer (nodal status, tumor size, differentiation grade, morphology, estrogen receptor status, human epidermal growth factor receptor 2 status, chemotherapy, endocrine therapy, radiotherapy).

the PRS<sub>313</sub>, compared with 20.5% at the 90<sup>th</sup> percentile of the PRS<sub>313</sub> (Figure 2), accounting for death as competing risk. When death was not taken into account as competing risk, the corresponding predicted risks by age 80 were 17.0% at the 10<sup>th</sup> percentile and 27.9% at the 90<sup>th</sup> percentile of the PRS<sub>313</sub> (Figure S4). Table 4 shows the 5- and 10-year cumulative CBC risks by PRS<sub>313</sub> for different age groups, accounting for death as competing risk (Table S7 shows results without competing risks).

### European and Asian (Case-Case Series) Logistic Regression Analyses

Figure 3 shows the distribution of the PRS<sub>313</sub> per SD in the European case-case series. Median PRS<sub>313</sub> was -0.4 (interquartile range [IQR] = 1.35) for control women without any diagnosis of breast cancer (N = 81,000), 0.2 (IQR = 1.36) for women with unilateral breast cancer (N = 62,830), and 0.5 (IQR = 1.40) for women with CBC (N = 3,607). The OR for unilateral breast cancer per SD of the PRS<sub>313</sub>, compared to control women, was 1.82 (95%CI = 1.80–1.84) (Table S8). The OR for CBC per SD of PRS<sub>313</sub>, compared to unilateral breast cancer, was 1.30 (95%CI = 1.26–1.35).

In sensitivity analyses, the OR per SD of PRS<sub>313</sub> was 1.27 (95%CI = 1.21–1.33) for metachronous CBC and the OR per SD was 1.29 (95%CI = 1.24–1.33) for invasive CBC, compared to unilateral breast cancer. When analyses were restricted to the validation set of Mavaddat et al.,<sup>7</sup> the OR for unilateral breast cancer per SD of the PRS<sub>313</sub> was 1.67 (95%CI = 1.59–1.76) compared to control women, and the OR for CBC per SD of PRS<sub>313</sub> was 1.39 (95%CI = 1.13–1.70) compared to unilateral breast cancer (Table S8).

For women of Asian descent, the OR for unilateral breast cancer per SD of the PRS<sub>313</sub> was 1.56 (95%CI = 1.52–1.60)

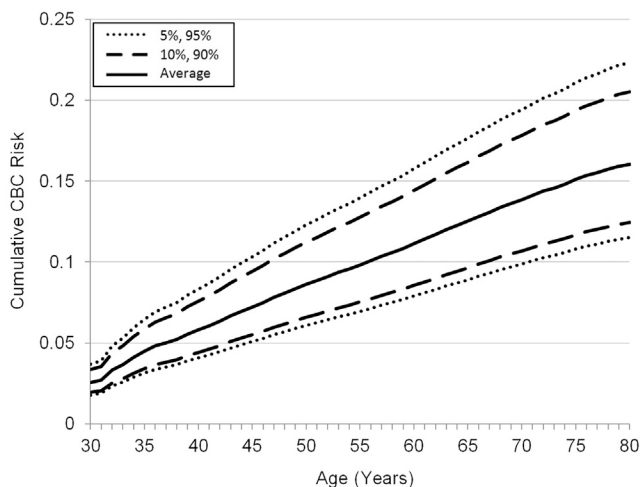

**Figure 2. Predicted Contralateral Breast Cancer Risk by Percentile of the 313-Variant PRS (PRS<sub>313</sub>) with Death as Competing Risk** Coefficients to construct the PRS<sub>313</sub> are shown in Table S3. The PRS<sub>313</sub> was standardized by SD = 0.61, in line with Mavaddat et al.<sup>7</sup> The CBC incidences were calculated based on incidence data from the Netherlands Cancer Registry<sup>1</sup> and relative risks estimated as described in the Material and Methods. PRS, polygenic risk score; CBC, contralateral breast cancer.

compared to control women, and the OR for CBC per SD of PRS<sub>313</sub> was 1.15 (95%CI = 1.02–1.29) compared to women with unilateral breast cancer (Table S8).

### Discussion

Previous studies have shown that a PRS, summarizing the effects of common germline variants, can be used to stratify women with respect to their risk to develop a primary breast cancer.<sup>6–9</sup> In this study, we observed a clear association between the PRS<sub>313</sub> and CBC risk in women of both European and Asian ancestry. The association was observed in both the case-case series and the European cohort. The HRs per SD of CBC for women at the 10<sup>th</sup> and 90<sup>th</sup> percentile of the continuous predicted PRS<sub>313</sub> were 0.75 and 1.33, respectively, compared to the 50<sup>th</sup> percentile. This translates to absolute risks at the 10<sup>th</sup> and the 90<sup>th</sup> percentile of the PRS<sub>313</sub> of 12.4% and 20.5%, respectively, by age 80 years. We estimated a C-index for the PRS<sub>313</sub>, summarizing its discriminatory ability, of 0.563 in the European cohort.

One previous study has investigated the effect of a PRS, including 67 variants, and CBC risk.<sup>10</sup> This study found a risk ratio of 1.75 (95%CI = 1.41–2.18) for women in the upper quartile of the PRS compared with women in the lowest quartile. To facilitate comparison, we performed a similar analysis in our case-case series, showing an OR of 1.98 (95%CI = 1.79–2.18), adjusted for country and age at first diagnosis, for women in the upper quartile of the PRS<sub>313</sub>. This indicates that the PRS<sub>313</sub> improves stratification relative to PRSs including fewer variants. Moreover, in our European cohort, the C-index for the PRS alone



**Table 4. 5- and 10-Year Cumulative Risks of Contralateral Breast Cancer by the 313-Variant PRS (PRS<sub>313</sub>) for Different Age Groups with Death as Competing Risk**

| Age at First Breast Cancer Diagnosis (years) | 5-Year Cumulative CBC Risks (%) Range by Age  |                                                |                                                |                                                |                                                | 10-Year Cumulative CBC risks (%) Range by Age |                                                |                                                |                                                |                                                |
|----------------------------------------------|-----------------------------------------------|------------------------------------------------|------------------------------------------------|------------------------------------------------|------------------------------------------------|-----------------------------------------------|------------------------------------------------|------------------------------------------------|------------------------------------------------|------------------------------------------------|
|                                              | 5 <sup>th</sup> Percentile PRS <sub>313</sub> | 10 <sup>th</sup> Percentile PRS <sub>313</sub> | 50 <sup>th</sup> Percentile PRS <sub>313</sub> | 90 <sup>th</sup> Percentile PRS <sub>313</sub> | 95 <sup>th</sup> Percentile PRS <sub>313</sub> | 5 <sup>th</sup> Percentile PRS <sub>313</sub> | 10 <sup>th</sup> Percentile PRS <sub>313</sub> | 50 <sup>th</sup> Percentile PRS <sub>313</sub> | 90 <sup>th</sup> Percentile PRS <sub>313</sub> | 95 <sup>th</sup> Percentile PRS <sub>313</sub> |
| 30–34                                        | 1.9–3.1                                       | 2.1–3.4                                        | 2.7–4.5                                        | 3.6–5.9                                        | 4.0–6.5                                        | 3.1–4.1                                       | 3.4–4.5                                        | 4.5–5.9                                        | 5.9–7.7                                        | 6.5–8.5                                        |
| 35–39                                        | 0.8–2.1                                       | 0.9–2.3                                        | 1.2–3.0                                        | 1.5–3.9                                        | 1.7–4.3                                        | 2.1–3.5                                       | 2.3–3.8                                        | 3.0–5.0                                        | 3.9–6.6                                        | 4.3–7.2                                        |
| 40–44                                        | 1.5–2.8                                       | 1.7–3.1                                        | 2.2–4.1                                        | 2.9–5.3                                        | 3.2–5.9                                        | 2.8–4.6                                       | 3.1–5.0                                        | 4.1–6.6                                        | 5.3–8.6                                        | 5.9–9.4                                        |
| 45–49                                        | 1.4–2.5                                       | 1.5–2.7                                        | 2.0–3.6                                        | 2.6–4.7                                        | 2.9–5.2                                        | 2.5–3.9                                       | 2.7–4.3                                        | 3.6–5.6                                        | 4.7–7.4                                        | 5.2–8.1                                        |
| 50–54                                        | 1.4–2.8                                       | 1.5–3.0                                        | 1.9–4.0                                        | 2.6–5.2                                        | 2.8–5.8                                        | 2.8–4.5                                       | 3.0–4.9                                        | 4.0–6.4                                        | 5.2–8.4                                        | 5.8–9.3                                        |
| 55–59                                        | 1.6–3.1                                       | 1.8–3.4                                        | 2.3–4.5                                        | 3.1–5.9                                        | 3.4–6.5                                        | 3.1–4.8                                       | 3.4–5.2                                        | 4.5–6.9                                        | 5.9–9.0                                        | 6.5–9.9                                        |
| 60–64                                        | 1.7–3.3                                       | 1.9–3.6                                        | 2.5–4.7                                        | 3.3–6.2                                        | 3.6–6.8                                        | 3.3–5.0                                       | 3.6–5.4                                        | 4.7–7.1                                        | 6.2–9.3                                        | 6.8–10.2                                       |
| 65–70                                        | 1.5–3.2                                       | 1.6–3.5                                        | 2.1–4.6                                        | 2.8–6.1                                        | 3.1–6.7                                        | 3.2–4.1                                       | 3.5–4.5                                        | 4.6–5.9                                        | 6.1–7.7                                        | 6.7–8.5                                        |

Abbreviations: PRS, polygenic risk score; CBC, contralateral breast cancer. Coefficients to construct the PRS<sub>313</sub> are shown in Table S3. The PRS<sub>313</sub> was standardized by SD = 0.61, in line with Mavaddat et al.<sup>7</sup> The CBC incidences for each age group were calculated based on incidence data from the Netherlands Cancer Registry<sup>1</sup> and relative risks estimated as described in the Material and Methods. Death was taken into account as competing risk.

improved from 0.547 (95%CI = 0.536–0.575) for the previously reported PRS<sub>77</sub><sup>6</sup> to 0.563 (95%CI = 0.547–0.586) for the PRS<sub>313</sub>.

We found no evidence that the association between the PRS<sub>313</sub> and CBC risk was confounded by family history, adjuvant therapy, morphology, age, or tumor receptor status of the first breast cancer, nor that there was effect modification by those factors. The absence of notable effect modification is in line with the abovementioned study of a 67-variant PRS and CBC risk; no heterogeneity in association was found by age, family history, morphology, ER status, and adjuvant treatment.<sup>10</sup>

To provide an external validation of our findings, we examined data from UK Biobank, which includes many

women diagnosed with breast cancer with data available on the PRS<sub>313</sub> (Supplemental Note). Unfortunately, UK Biobank has no information available on the laterality of the tumor, and it is, therefore, not possible to distinguish between contralateral and ipsilateral breast cancers. We therefore performed analyses using any second breast cancer as the endpoint. This secondary analysis did confirm the association between the PRS<sub>313</sub> and second breast cancer risk (HR per SD = 1.13, 95%CI = 1.01–1.27), but with a lower estimate than in our European cohort. The lower estimate may be explained by the inclusion of the ipsilateral breast cancers, which may be more likely to be recurrences than new primary breast cancers compared to CBCs. Indeed, when we used ipsilateral breast cancer as the outcome in our European cohort, we found no association with the PRS<sub>313</sub> (HR = 1.02, 95%CI = 0.90–1.15).

The association between the PRS<sub>313</sub> and CBC risk (OR per SD = 1.30; 95%CI = 1.26–1.35) in the BCAC database was weaker (expressed in terms of an OR) than was found for first breast cancer among independent prospective studies (OR per SD = 1.61; 95%CI = 1.57–1.65). Under a simple polygenic model, the relative risk would be expected to be similar for the second breast cancer. The attenuated estimate for CBC might however be explained by several factors. Some attenuation of the estimate might have been due to dilution in the end-point definition, i.e., if some of the CBCs were metastases. Previous studies investigating the clonal relatedness of first breast cancers and CBCs using tumor sequencing have shown that 6%–12% of CBCs represent metastases.<sup>18,19</sup> This hypothesis would be consistent with our finding of a slightly stronger association between the PRS<sub>313</sub> and late CBCs, diagnosed >5 years after the first breast cancer, than for early CBCs, diagnosed ≥5 years after the first cancer, since the latter are more likely to be metastases. In addition, 3%–5% of

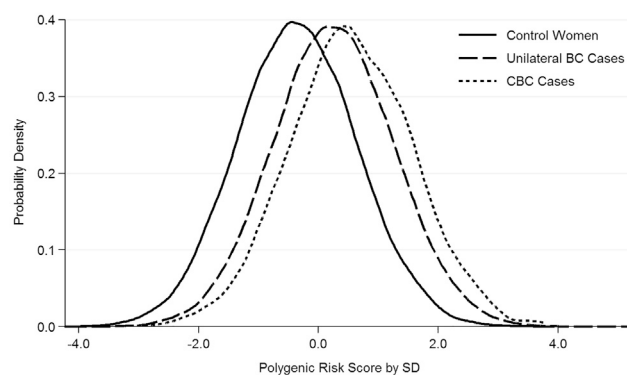

**Figure 3. Distribution of the 313-Variant PRS (PRS<sub>313</sub>) in 62,830 Control Women without Any Diagnosis of Breast Cancer, 81,000 Women with Unilateral Breast Cancer, and 3,607 Women with Contralateral Breast Cancer**

Coefficients to construct the PRS<sub>313</sub> are shown in Table S3. The PRS<sub>313</sub> was standardized by SD = 0.61, in line with Mavaddat et al.<sup>7</sup> PRS, polygenic risk score; BC, breast cancer; CBC, contralateral breast cancer; SD, standard deviation.

the women with breast cancer will have a mutation in *BRCA1* or *BRCA2*,<sup>20,21</sup> who have high CBC risks. It has been shown that the relative risk associated with PRS is lower (for the first breast cancer) for women with a *BRCA1* and *BRCA2* mutation than in the general population,<sup>22</sup> diluting the overall relative risk for CBC. More generally, it is possible that the CBC association may be attenuated due to the effect of other, unmeasured, genetic or other risk factors. If the risks are high, case subjects with higher PRS<sub>313</sub> will have, on average, lower values of other risk factors, due to elimination of the highest risk individuals, again attenuating the CBC association. Finally, given the limited information on family history in our dataset, the estimate could have been biased due to a family history effect not detected in our data.

There was some suggestion that the relative risk associated with PRS<sub>313</sub> decreased with younger age ( $P_{\text{trend}} = 0.05$ ) and, specifically, was lower for women aged <40 years (HR per SD = 1.13; 95%CI = 0.98–1.31). Interestingly, Mavaddat et al.<sup>7</sup> also found a lower relative risk below age 40 for first breast cancer. This effect may reflect the different characteristics of breast cancers at young ages, both in terms of germline susceptibility and pathology.<sup>23,24</sup> For example, the proportion of ER-negative breast cancers is higher at young ages, and the PRS is less predictive for ER-negative disease.<sup>6,7,24</sup>

In the logistic regression analyses in Asian women, the association between the PRS<sub>313</sub> and CBC risk was slightly weaker than in European women. This finding is consistent with a recent analysis investigating the association between a 287-variant PRS and first breast cancer risk in the Asian population,<sup>25</sup> which showed an attenuated OR in Asian women (OR = 1.52, 95%CI = 1.49–1.56) compared to European women (OR = 1.61, 95%CI = 1.57–1.66). The lower estimate for Asian women might reflect the fact the PRS<sub>313</sub> was developed in European populations, and the different LD structure in Asians may attenuate the association since the variants in the PRS are likely to be surrogates for the causal variants. Other explanations for the attenuated estimate may be the slightly younger age at first breast cancer diagnosis and the higher proportion ER-negative CBCs in Asian women compared to European women in our study. Finally, the imputation quality for variants was somewhat lower, on average, for the Asian than for the European dataset, with three variants on OncoArray and four variants on ICOGs with an imputation quality score < 0.3 (Table S3). Nevertheless, we included those variants in the PRS for both European and Asian women, to keep the PRS comparable between ethnicities and studies. Future studies including larger numbers of Asian women, and women of other ethnicities, are needed to generate population-specific PRSs and to validate our findings in these groups.

A major strength of this study is the very large sample size in the BCAC dataset, including genotype information for ~150,000 women and a large number of CBC

events. A limitation of this study is missing data on the patient, tumor, and treatment characteristics, which reduces the power of the multivariable Cox regression analyses and interaction analyses. In addition, registration of CBC was not complete; the 10-year cumulative CBC incidence was 2.2% in the BCAC dataset, compared to 3.8% using complete data from the Netherlands Cancer Registry.<sup>1</sup> For this reason, we estimated relative risk estimates using the BCAC data and applied these to external registry data to obtain absolute risk estimates. The under-reporting of CBC should not bias our HR estimates, given that the event rate is low and reporting of CBC is unlikely to be related to the PRS<sub>313</sub>. Moreover, we reran the cohort analysis in the subset of countries with a 10-year cumulative CBC incidence  $\geq 3.0\%$  in the BCAC dataset, and the estimates were very similar to the main analyses (HR per SD = 1.23, 95%CI = 1.14–1.33) (Figure S3).

In conclusion, the PRS<sub>313</sub> is predictive for the development of CBC. We found no evidence for confounding or effect modification by other previously established CBC risk factors. The PRS<sub>313</sub> is therefore likely to be an independent risk factor for CBC. Since the predictive ability of the PRS on its own is modest, it should be combined with other breast cancer risk factors to provide more useful CBC risk prediction models. More accurate risk prediction will help identify women at high CBC risk who will benefit from additional surveillance and/or risk reducing mastectomy, and equally important, to identify those women at low risk in order to avoid unnecessary surgeries.

## Data and Code Availability

Data used in this manuscript may be requested through the original providers. Data of the Breast Cancer Association Consortium may be requested for non-profit research through an application procedure with the Breast Cancer Association Consortium. Data of the UK Biobank needs to be requested through UK Biobank.

## Supplemental Data

Supplemental Data can be found online at <https://doi.org/10.1016/j.ajhg.2020.09.001>.

## Declaration of Interests

M.W.B. conducts research funded by Amgen, Novartis, and Pfizer, outside the submitted work. P.A.F. conducts research funded by Amgen, Novartis, and Pfizer, outside the submitted work. He received honoraria from Roche, Novartis, and Pfizer. H.N. received honorarium from Astra Zeneca outside the submitted work.

Received: May 15, 2020

Accepted: September 2, 2020

Published: October 5, 2020

## Web Resources

Breast Cancer Association Consortium, <http://bcac.ccge.medschl.cam.ac.uk/bcacdata/>  
UK Biobank, <https://www.ukbiobank.ac.uk/researchers/>

## References

1. Kramer, I., Schaapveld, M., Oldenburg, H.S.A., Sonke, G.S., McCool, D., van Leeuwen, F.E., Van de Vijver, K.K., Russell, N.S., Linn, S.C., Siesling, S., et al. (2019). The influence of adjuvant systemic regimens on contralateral breast cancer risk and receptor subtype. *J. Natl. Cancer Inst.* *111*, 709–718.
2. Xiong, Z., Yang, L., Deng, G., Huang, X., Li, X., Xie, X., Wang, J., Shuang, Z., and Wang, X. (2018). Patterns of Occurrence and Outcomes of Contralateral Breast Cancer: Analysis of SEER Data. *J. Clin. Med.* *7*, 7.
3. Akdeniz, D., Schmidt, M.K., Seynaeve, C.M., McCool, D., Giardiello, D., van den Broek, A.J., Hauptmann, M., Steyerberg, E.W., and Hooning, M.J. (2019). Risk factors for metachronous contralateral breast cancer: A systematic review and meta-analysis. *Breast* *44*, 1–14.
4. Michailidou, K., Lindström, S., Dennis, J., Beesley, J., Hui, S., Kar, S., Lemaçon, A., Soucy, P., Glubb, D., Rostamianfar, A., et al.; NBCS Collaborators; ABCTB Investigators; and ConFab/AOCS Investigators (2017). Association analysis identifies 65 new breast cancer risk loci. *Nature* *551*, 92–94.
5. Milne, R.L., Kuchenbaecker, K.B., Michailidou, K., Beesley, J., Kar, S., Lindström, S., Hui, S., Lemaçon, A., Soucy, P., Dennis, J., et al.; ABCTB Investigators; EMBRACE; GEMO Study Collaborators; HEBON; kConFab/AOCS Investigators; and NBCS Collaborators (2017). Identification of ten variants associated with risk of estrogen-receptor-negative breast cancer. *Nat. Genet.* *49*, 1767–1778.
6. Mavaddat, N., Pharoah, P.D., Michailidou, K., Tyrer, J., Brook, M.N., Bolla, M.K., Wang, Q., Dennis, J., Dunning, A.M., Shah, M., et al. (2015). Prediction of breast cancer risk based on profiling with common genetic variants. *J. Natl. Cancer Inst.* *107*, 107.
7. Mavaddat, N., Michailidou, K., Dennis, J., Lush, M., Fachal, L., Lee, A., Tyrer, J.P., Chen, T.H., Wang, Q., Bolla, M.K., et al.; ABCTB Investigators; kConFab/AOCS Investigators; and NBCS Collaborators (2019). Polygenic Risk Scores for Prediction of Breast Cancer and Breast Cancer Subtypes. *Am. J. Hum. Genet.* *104*, 21–34.
8. Brentnall, A.R., van Veen, E.M., Harkness, E.F., Rafiq, S., Byers, H., Astley, S.M., Sampson, S., Howell, A., Newman, W.G., Cuzick, J., and Evans, D.G.R. (2020). A case-control evaluation of 143 single nucleotide polymorphisms for breast cancer risk stratification with classical factors and mammographic density. *Int. J. Cancer* *146*, 2122–2129.
9. Shieh, Y., Hu, D., Ma, L., Huntsman, S., Gard, C.C., Leung, J.W., Tice, J.A., Vachon, C.M., Cummings, S.R., Kerlikowske, K., and Ziv, E. (2016). Breast cancer risk prediction using a clinical risk model and polygenic risk score. *Breast Cancer Res. Treat.* *159*, 513–525.
10. Robson, M.E., Reiner, A.S., Brooks, J.D., Concannon, P.J., John, E.M., Mellempkjaer, L., Bernstein, L., Malone, K.E., Knight, J.A., Lynch, C.F., et al. (2017). Association of Common Genetic Variants With Contralateral Breast Cancer Risk in the WECARE Study. *J. Natl. Cancer Inst.* *J. Natl. Cancer Inst.* *109*, djx051, djx051.
11. Teraoka, S.N., Bernstein, J.L., Reiner, A.S., Haile, R.W., Bernstein, L., Lynch, C.F., Malone, K.E., Stovall, M., Capanu, M., Liang, X., et al.; WECARE Study Collaborative Group (2011). Single nucleotide polymorphisms associated with risk for contralateral breast cancer in the Women's Environment, Cancer, and Radiation Epidemiology (WECARE) Study. *Breast Cancer Res.* *13*, R114.
12. Michailidou, K., Beesley, J., Lindstrom, S., Canisius, S., Dennis, J., Lush, M.J., Maranian, M.J., Bolla, M.K., Wang, Q., Shah, M., et al.; BOCS; kConFab Investigators; AOCS Group; NBCS; and GENICA Network (2015). Genome-wide association analysis of more than 120,000 individuals identifies 15 new susceptibility loci for breast cancer. *Nat. Genet.* *47*, 373–380.
13. Michailidou, K., Hall, P., Gonzalez-Neira, A., Ghoussaini, M., Dennis, J., Milne, R.L., Schmidt, M.K., Chang-Claude, J., Bojesen, S.E., Bolla, M.K., et al.; Breast and Ovarian Cancer Susceptibility Collaboration; Hereditary Breast and Ovarian Cancer Research Group Netherlands (HEBON); kConFab Investigators; Australian Ovarian Cancer Study Group; and GENICA (Gene Environment Interaction and Breast Cancer in Germany) Network (2013). Large-scale genotyping identifies 41 new loci associated with breast cancer risk. *Nat. Genet.* *45*, 353–361, e1–e2.
14. Amos, C.I., Dennis, J., Wang, Z., Byun, J., Schumacher, F.R., Gayther, S.A., Casey, G., Hunter, D.J., Sellers, T.A., Gruber, S.B., et al. (2017). The OncoArray Consortium: A Network for Understanding the Genetic Architecture of Common Cancers. *Cancer Epidemiol. Biomarkers Prev.* *26*, 126–135.
15. Schoenfeld, D.A. (1983). Sample-size formula for the proportional-hazards regression model. *Biometrics* *39*, 499–503.
16. Harrell, F.E., Jr., Califf, R.M., Pryor, D.B., Lee, K.L., and Rosati, R.A. (1982). Evaluating the yield of medical tests. *JAMA* *247*, 2543–2546.
17. Antoniou, A.C., Beesley, J., McGuffog, L., Sinilnikova, O.M., Healey, S., Neuhausen, S.L., Ding, Y.C., Rebbeck, T.R., Weitzel, J.N., Lynch, H.T., et al.; Ontario Cancer Genetics Network; SWE-BRCA; HEBON; EMBRACE; GEMO; GEMO; Breast Cancer Family Registry; kConFab; and CIMBA (2010). Common breast cancer susceptibility alleles and the risk of breast cancer for BRCA1 and BRCA2 mutation carriers: implications for risk prediction. *Cancer Res.* *70*, 9742–9754.
18. Klevebring, D., Lindberg, J., Rockberg, J., Hilliges, C., Hall, P., Sandberg, M., and Czene, K. (2015). Exome sequencing of contralateral breast cancer identifies metastatic disease. *Breast Cancer Res. Treat.* *151*, 319–324.
19. Begg, C.B., Ostrovskaya, I., Geyer, F.C., Papanastasiou, A.D., Ng, C.K.Y., Sakr, R.A., Bernstein, J.L., Burke, K.A., King, T.A., Piscuoglio, S., et al. (2018). Contralateral breast cancers: Independent cancers or metastases? *Int. J. Cancer* *142*, 347–356.
20. Thompson, D., and Easton, D. (2004). The genetic epidemiology of breast cancer genes. *J. Mammary Gland Biol. Neoplasia* *9*, 221–236.
21. van den Broek, A.J., van 't Veer, L.J., Hooning, M.J., Cornelissen, S., Broeks, A., Rutgers, E.J., Smit, V.T., Cornelisse, C.J., van Beek, M., Janssen-Heijnen, M.L., et al. (2016). Impact of Age at Primary Breast Cancer on Contralateral Breast Cancer Risk in BRCA1/2 Mutation Carriers. *J. Clin. Oncol.* *34*, 409–418.
22. Kuchenbaecker, K.B., McGuffog, L., Barrowdale, D., Lee, A., Soucy, P., Dennis, J., Domchek, S.M., Robson, M., Spurdle, A.B., Ramus, S.J., et al. (2017). Evaluation of Polygenic Risk Scores for Breast and Ovarian Cancer Risk Prediction in

- BRCA1 and BRCA2 Mutation Carriers. *J. Natl. Cancer Inst.* *109*, 109.
23. Azim, H.A., Jr., Michiels, S., Bedard, P.L., Singhal, S.K., Crischiello, C., Ignatiadis, M., Haibe-Kains, B., Piccart, M.J., Sotiropoulos, C., and Loi, S. (2012). Elucidating prognosis and biology of breast cancer arising in young women using gene expression profiling. *Clin. Cancer Res.* *18*, 1341–1351.
24. Anders, C.K., Hsu, D.S., Broadwater, G., Acharya, C.R., Foekens, J.A., Zhang, Y., Wang, Y., Marcom, P.K., Marks, J.R., Febbo, P.G., et al. (2008). Young age at diagnosis correlates with worse prognosis and defines a subset of breast cancers with shared patterns of gene expression. *J. Clin. Oncol.* *26*, 3324–3330.
25. Ho, W.K., Tan, M.M., Mavaddat, N., Tai, M.C., Mariapun, S., Li, J., Ho, P.J., Dennis, J., Tyrer, J.P., Bolla, M.K., et al. (2020). European polygenic risk score for prediction of breast cancer shows similar performance in Asian women. *Nat. Commun.* *11*, 3833.

## Supplemental Data

### Breast Cancer Polygenic Risk Score and Contralateral Breast Cancer Risk

Iris Kramer, Maartje J. Hooning, Nasim Mavaddat, Michael Hauptmann, Renske Keeman, Ewout W. Steyerberg, Daniele Giardiello, Antonis C. Antoniou, Paul D.P. Pharoah, Sander Canisius, Zumuruda Abu-Ful, Irene L. Andrulis, Hoda Anton-Culver, Kristan J. Aronson, Annelie Augustinsson, Heiko Becher, Matthias W. Beckmann, Sabine Behrens, Javier Benitez, Marina Bermisheva, Natalia V. Bogdanova, Stig E. Bojesen, Manjeet K. Bolla, Bernardo Bonanni, Hiltrud Brauch, Michael Bremer, Sara Y. Brucker, Barbara Burwinkel, Jose E. Castelao, Tsun L. Chan, Jenny Chang-Claude, Stephen J. Chanock, Georgia Chenevix-Trench, Ji-Yeob Choi, Christine L. Clarke, NBCS Collaborators, J. Margriet Collée, Fergus J. Couch, Angela Cox, Simon S. Cross, Kamila Czene, Mary B. Daly, Peter Devilee, Thilo Dörk, Isabel dos-Santos-Silva, Alison M. Dunning, Miriam Dwek, Diana M. Eccles, D. Gareth Evans, Peter A. Fasching, Henrik Flyger, Manuela Gago-Dominguez, Montserrat García-Closas, José A. García-Sáenz, Graham G. Giles, David E. Goldgar, Anna González-Neira, Christopher A. Haiman, Niclas Håkansson, Ute Hamann, Mikael Hartman, Bernadette A.M. Heemskerk-Gerritsen, Antoinette Hollestelle, John L. Hopper, Ming-Feng Hou, Anthony Howell, ABCTB Investigators, kConFab Investigators, Hidemi Ito, Milena Jakimovska, Anna Jakubowska, Wolfgang Janni, Esther M. John, Audrey Jung, Daehee Kang, C. Marleen Kets, Elza Khusnutdinova, Yon-Dschun Ko, Vessela N. Kristensen, Allison W. Kurian, Ava Kwong, Diether Lambrechts, Loic Le Marchand, Jingmei Li, Annika Lindblom, Jan Lubiński, Arto Mannermaa, Mehdi Manoochehri, Sara Margolin, Keitaro Matsuo, Dimitrios Mavroudis, Alfons Meindl, Roger L. Milne, Anna Marie Mulligan, Taru A. Muranen, Susan L. Neuhausen, Heli Nevanlinna, William G. Newman, Andrew F. Olshan, Janet E. Olson, Håkan Olsson, Tjoung-Won Park-Simon, Julian Peto, Christos Petridis, Dijana Plaseska-Karanfilska, Nadege Presneau, Katri Pylkäs, Paolo Radice, Gad Rennert, Atocha Romero, Rebecca Roylance, Emmanouil Saloustros, Elinor J. Sawyer, Rita K. Schmutzler, Lukas Schwentner, Christopher Scott, Mee-Hoong See, Mitul Shah, Chen-Yang Shen, Xiao-Ou Shu, Sabine Siesling, Susan Slager, Christof Sohn, Melissa C. Southey, John J. Spinelli, Jennifer Stone, William J. Tapper, Maria Tengström, Soo Hwang Teo, Mary Beth Terry, Rob A.E.M. Tollenaar, Ian Tomlinson, Melissa A. Troester, Celine M. Vachon, Chantal van Ongeval, Elke M. van Veen, Robert Winqvist, Alicja Wolk, Wei Zheng, Argyrios Ziogas, Douglas F. Easton, Per Hall, and Marjanka K. Schmidt

# Supplemental Figures

Figure S1A. Overview of the selection of women with breast cancer and control women for the European series

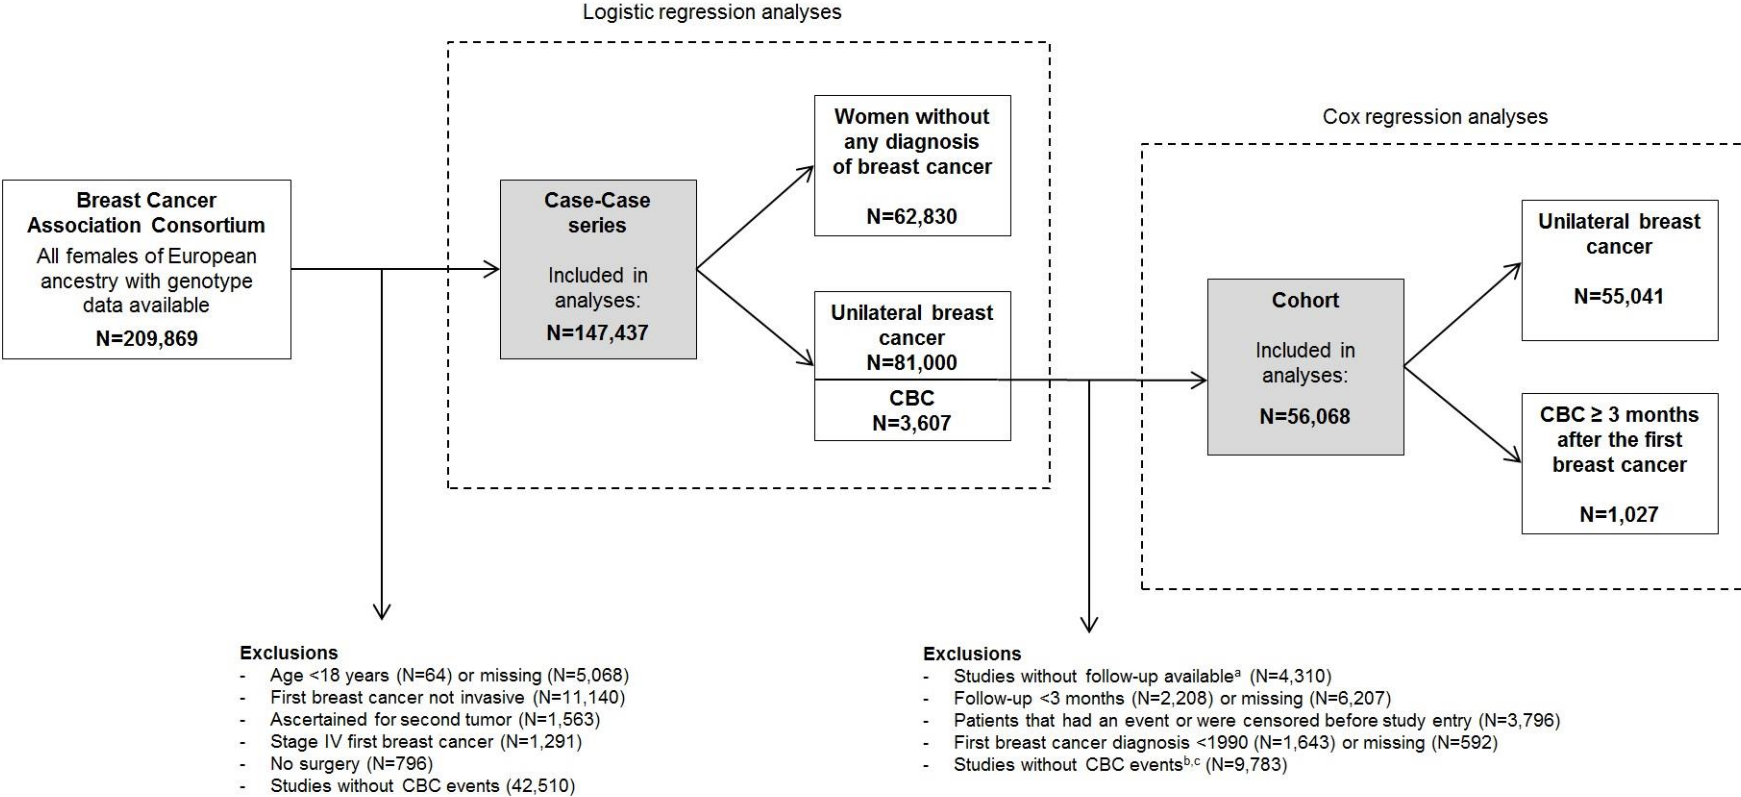

Abbreviations: CBC = contralateral breast cancer

For a complete overview of all studies see Table S1

<sup>a</sup> Excluded studies: CBCS, GLACIER, HMBCS, TNBCC

<sup>b</sup> Excluded studies: BCFR-NY, BCFR-UTAH, CNIO-BCS, DIETCOMPLYF, FHRISK, GESBC, HABCS, HUBCS, ICICLE, KBCP, MCCS, MMHS, NCBCS, PREFACE, SUCCESSB, SUCCESSC

<sup>c</sup> These studies dropped out because for these analyses the definition of CBC is based on the criteria that the CBC was diagnosed at least three months after the first breast cancer diagnosis

**Figure S1B. Overview of the selection of women with breast cancer and control women for Asian series**

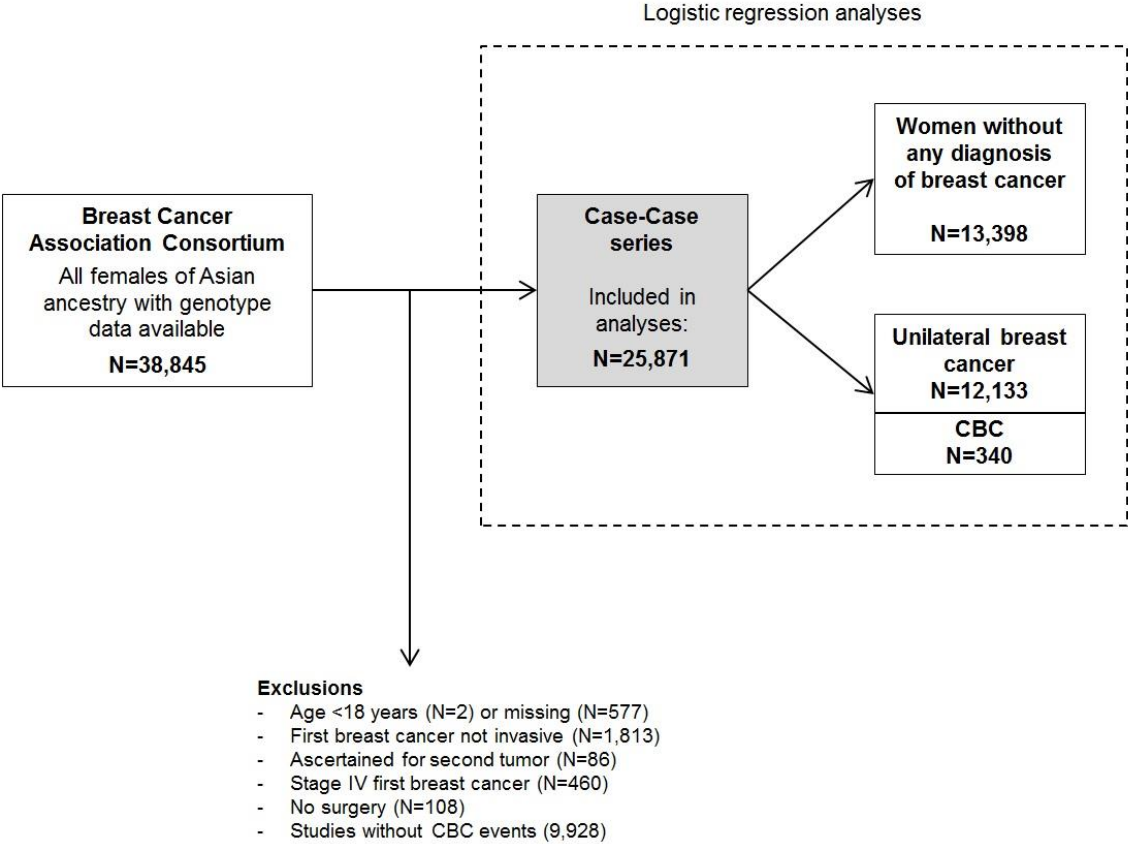

Abbreviations: CBC = contralateral breast cancer

**Figure S2. Correlation of total variant scores between the iCOGS array and OncoArray for the 77-variant PRS and the 313-variant PRS<sup>a,b</sup>**

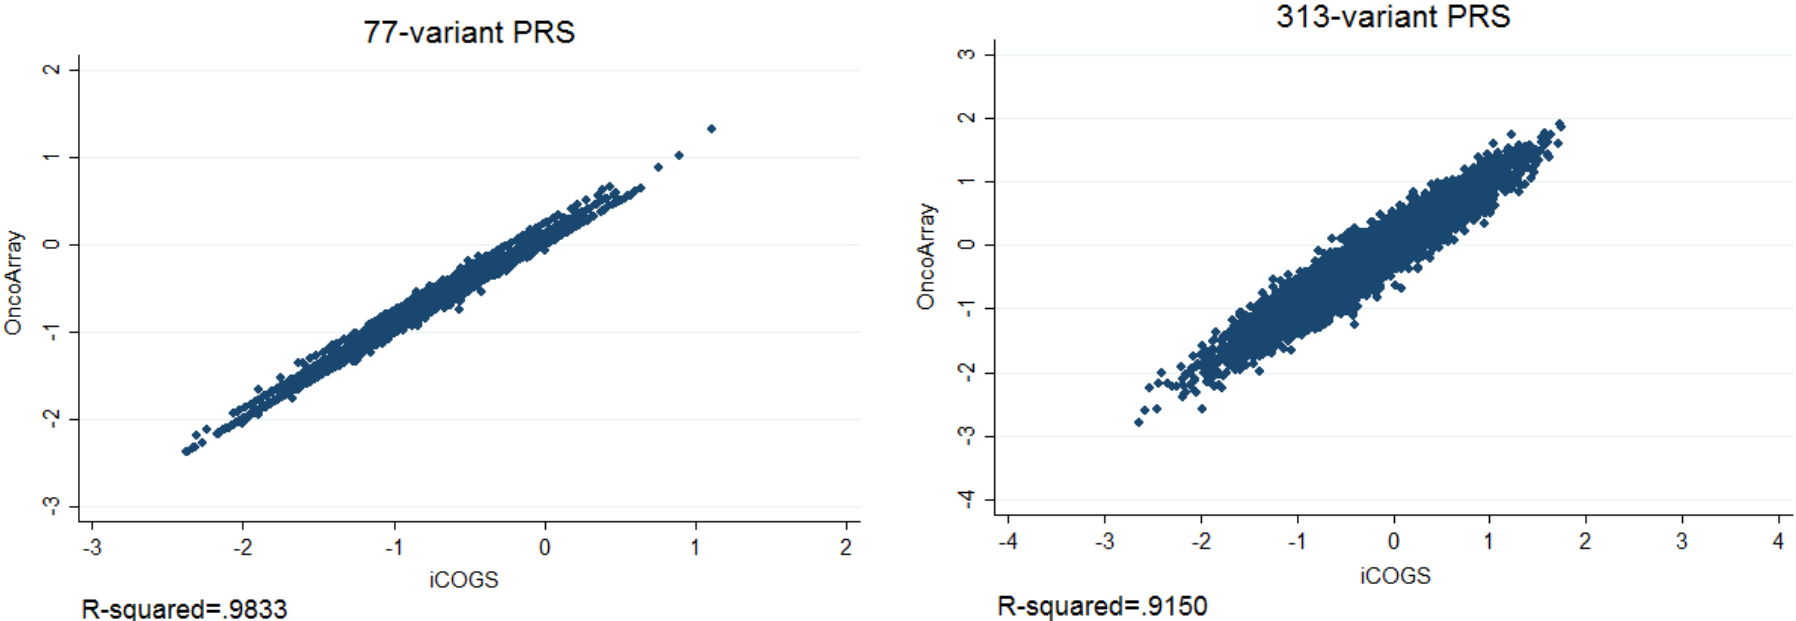

Abbreviations: PRS = polygenic risk score, SD = standard deviation

<sup>a</sup>We evaluated consistency between iCOGS and OncoArray using the intraclass correlation coefficient (ICC), showing a ICC of 0.99 (95%CI=0.99-0.99) for the PRS<sub>77</sub>, and an ICC of 0.96 (95%CI=0.95-0.96) for the PRS<sub>313</sub>, based on N=9,071 observations

<sup>b</sup>Coefficients to construct the PRSs are shown in Table S3. The PRSs were standardized by the same SD as was used by Mavaddat et al.<sup>1</sup>. The SD was 0.45 for overall breast cancer PRS<sub>77</sub>, and 0.61 for overall breast cancer PRS<sub>313</sub>



**Figure S3. Forest plot of the association between the 313-variant PRS and contralateral breast cancer risk by country<sup>a,b</sup>**

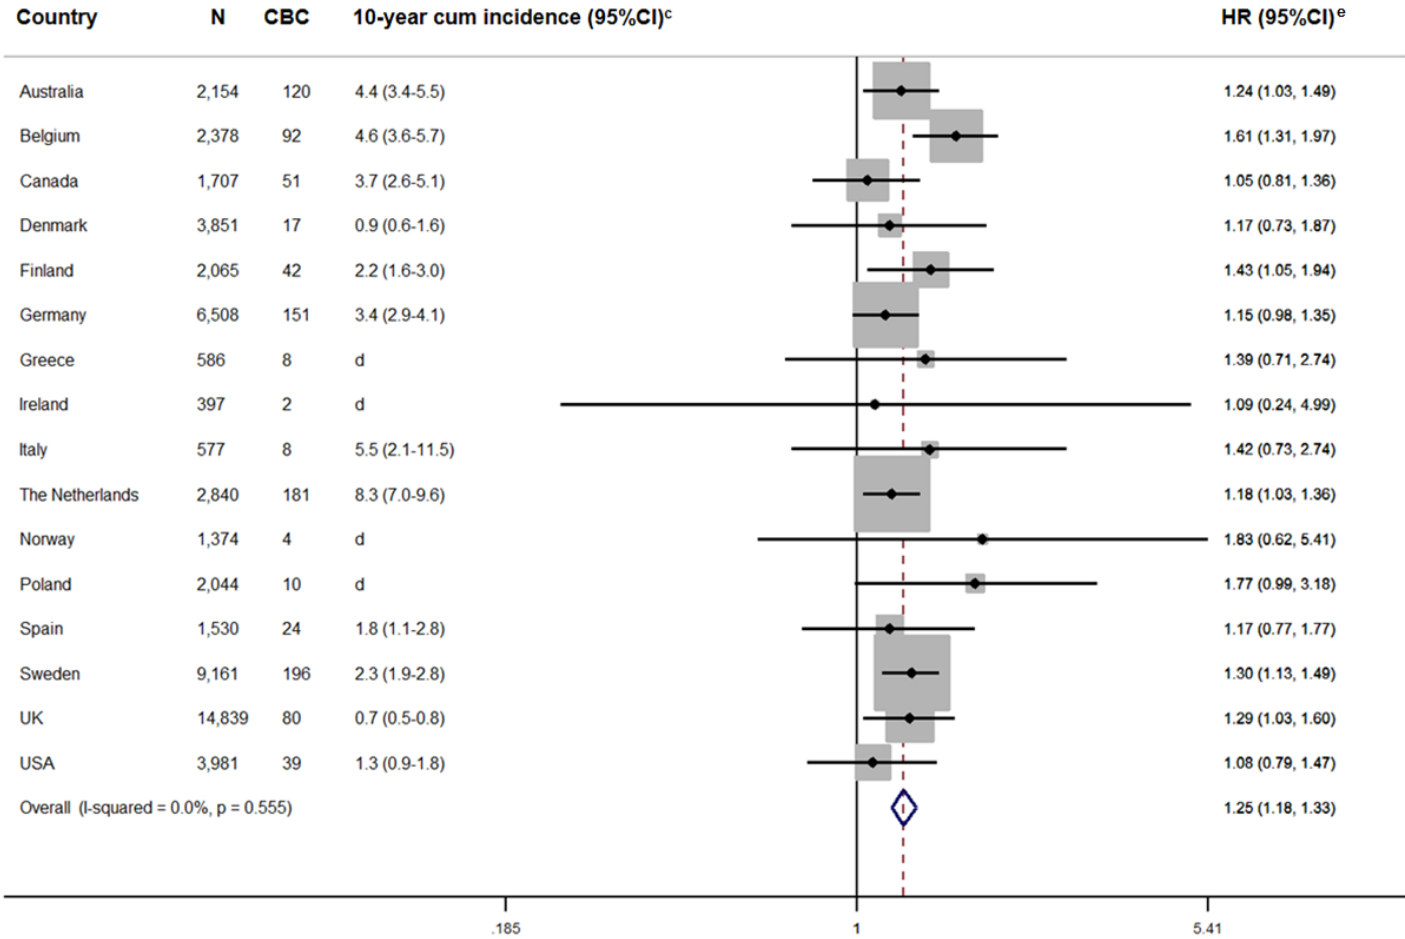

Abbreviations: PRS = polygenic risk score, N = number of women, CBC = contralateral breast cancer, cum = cumulative, CI = confidence interval, HR = hazard ratio, SD = standard deviation

Fixed effect meta-analysis was used to calculate I-squared and P-value for heterogeneity

<sup>a</sup> Republic of North Macedonia was left out this plot because of a too small sample size (N=76 women including N=2 CBC events)

<sup>b</sup> Coefficients to construct the PRS<sub>313</sub> are shown in Table S3. The PRS<sub>313</sub> was standardized by SD=0.61, in line with Mavaddat et al.<sup>1</sup>

<sup>c</sup> The 10-year cumulative incidence of CBC was estimated with time since first breast cancer as time scale, and distant metastases (where available) and death as competing risks

<sup>d</sup> Follow-up too short for calculating 10-year cumulative incidence

<sup>e</sup> HR per SD. The analyses were performed with attained age as the time scale

Figure S4. Predicted contralateral breast cancer risk by percentile of the 313-variant PRS (PRS<sub>313</sub>)

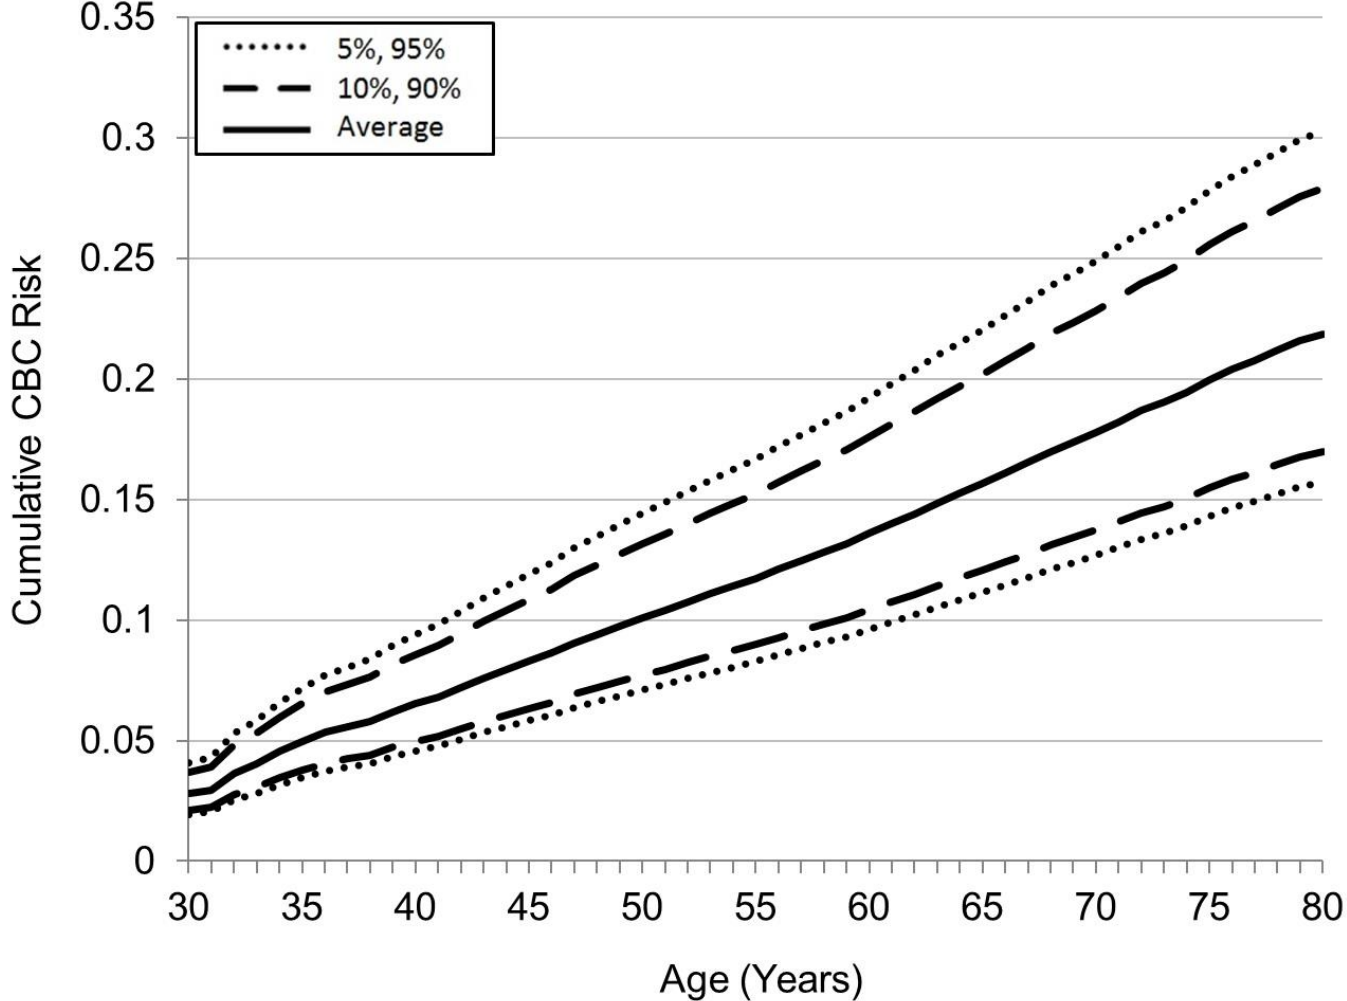

Abbreviations: PRS = polygenic risk score, CBC = contralateral breast cancer  
Coefficients to construct the PRS<sub>313</sub> are shown in Table S3. The PRS<sub>313</sub> was standardized by SD=0.61, in line with Mavaddat et al<sup>1</sup>. The CBC incidences were calculated based on incidence data from the Netherlands Cancer Registry<sup>2</sup> and relative risks estimated as described in the Material and Methods. In contrast to Figure 2, death was not taken into account as competing risk.

## **Supplemental Tables**

**Table S1. Study characteristics of included studies of the Breast Cancer Association Consortium**

**Table S2. Studies and samples included in the analyses using the case-case series, cohort, and validation set**

| Studies      | European                           |               |     |                          |     |                                  |               |     |                                   | Asian         |     |  |
|--------------|------------------------------------|---------------|-----|--------------------------|-----|----------------------------------|---------------|-----|-----------------------------------|---------------|-----|--|
|              | Case-case series<br>N studies = 62 |               |     | Cohort<br>N studies = 42 |     | Validation set<br>N studies = 24 |               |     | Case-case series<br>N studies = 8 |               |     |  |
|              | Control women <sup>a</sup>         | Unilateral BC | CBC | Unilateral BC            | CBC | Control women <sup>a</sup>       | Unilateral BC | CBC | Control women <sup>a</sup>        | Unilateral BC | CBC |  |
| ABCFS        | 738                                | 1,149         | 127 | 1,021                    | 93  | -                                | -             | -   | -                                 | -             | -   |  |
| ABCS         | 1,567                              | 1,047         | 54  | 519                      | 14  | -                                | -             | -   | -                                 | -             | -   |  |
| ABCS-F       | 0                                  | 861           | 91  | 363                      | 17  | -                                | -             | -   | -                                 | -             | -   |  |
| ABCTB        | 375                                | 900           | 17  | 708                      | 1   | 74                               | 180           | 8   | -                                 | -             | -   |  |
| BBCC         | 711                                | 845           | 58  | 766                      | 6   | 49                               | 56            | 5   | -                                 | -             | -   |  |
| BBCS         | 1,768                              | 1,266         | 80  | 466                      | 1   | -                                | -             | -   | -                                 | -             | -   |  |
| BCEES        | -                                  | -             | -   | -                        | -   | 166                              | 133           | 0   | -                                 | -             | -   |  |
| BCFR-NY      | 27                                 | 340           | 61  | -                        | -   | -                                | -             | -   | -                                 | -             | -   |  |
| BCFR-PA      | 0                                  | 104           | 14  | 69                       | 4   | -                                | -             | -   | -                                 | -             | -   |  |
| BCFR-UTAH    | 0                                  | 13            | 87  | -                        | -   | -                                | -             | -   | -                                 | -             | -   |  |
| BCINIS       | -                                  | -             | -   | -                        | -   | 144                              | 262           | 0   | -                                 | -             | -   |  |
| BIGGS        | 49                                 | 713           | 50  | 395                      | 2   | -                                | -             | -   | -                                 | -             | -   |  |
| BREOGAN      | 725                                | 1,245         | 19  | 1,233                    | 15  | 145                              | 238           | 4   | -                                 | -             | -   |  |
| BSUCH        | 1,122                              | 900           | 36  | 727                      | 3   | -                                | -             | -   | -                                 | -             | -   |  |
| CBCS         | 817                                | 530           | 21  | -                        | -   | 163                              | 105           | 4   | 170                               | 238           | 10  |  |
| CCGP         | 321                                | 598           | 19  | 578                      | 8   | 66                               | 125           | 7   | -                                 | -             | -   |  |
| CGPS         | 5,250                              | 4,135         | 60  | 3,834                    | 17  | 142                              | 227           | 3   | -                                 | -             | -   |  |
| CNIO-BCS     | 829                                | 742           | 5   | -                        | -   | -                                | -             | -   | -                                 | -             | -   |  |
| CTS          | -                                  | -             | -   | -                        | -   | 115                              | 220           | 0   | -                                 | -             | -   |  |
| DIETCOMPLYF  | 0                                  | 704           | 1   | -                        | -   | -                                | -             | -   | -                                 | -             | -   |  |
| FHRISK       | 0                                  | 119           | 2   | -                        | -   | -                                | -             | -   | -                                 | -             | -   |  |
| GC-HBOC      | 1,732                              | 2,690         | 230 | 1,406                    | 47  | -                                | -             | -   | -                                 | -             | -   |  |
| GENICA       | 711                                | 869           | 26  | 869                      | 1   | 56                               | 89            | 2   | -                                 | -             | -   |  |
| GESBC        | 181                                | 303           | 3   | -                        | -   | -                                | -             | -   | -                                 | -             | -   |  |
| GLACIER      | 0                                  | 1,733         | 230 | -                        | -   | -                                | -             | -   | -                                 | -             | -   |  |
| HABCS        | 863                                | 774           | 84  | -                        | -   | 173                              | 141           | 6   | -                                 | -             | -   |  |
| HCSC         | 0                                  | 362           | 13  | 273                      | 9   | -                                | -             | -   | -                                 | -             | -   |  |
| HEBCS        | 1,060                              | 1,632         | 116 | 1,578                    | 41  | -                                | -             | -   | -                                 | -             | -   |  |
| HERPACC      | -                                  | -             | -   | -                        | -   | -                                | -             | -   | 1,659                             | 756           | 18  |  |
| HKBCS        | -                                  | -             | -   | -                        | -   | -                                | -             | -   | 451                               | 403           | 12  |  |
| HMBCS        | 345                                | 729           | 28  | -                        | -   | -                                | -             | -   | -                                 | -             | -   |  |
| HUBCS        | 116                                | 198           | 2   | -                        | -   | -                                | -             | -   | -                                 | -             | -   |  |
| ICICLE       | 1                                  | 138           | 12  | -                        | -   | -                                | -             | -   | -                                 | -             | -   |  |
| KARBAC       | 0                                  | 761           | 46  | 443                      | 32  | -                                | -             | -   | -                                 | -             | -   |  |
| KARMA        | 5,981                              | 2,314         | 96  | 2,188                    | 33  | 597                              | 185           | 10  | -                                 | -             | -   |  |
| KBCP         | 431                                | 516           | 9   | -                        | -   | -                                | -             | -   | -                                 | -             | -   |  |
| KCONFAB/AOCS | 898                                | 397           | 83  | 305                      | 26  | -                                | -             | -   | -                                 | -             | -   |  |
| LMBC         | 1,821                              | 3,016         | 208 | 2,286                    | 92  | 87                               | 142           | 14  | -                                 | -             | -   |  |
| MABCS        | 88                                 | 80            | 9   | 74                       | 2   | -                                | -             | -   | -                                 | -             | -   |  |

|                        |               |               |              |               |              |              |              |                |               |               |            |     |
|------------------------|---------------|---------------|--------------|---------------|--------------|--------------|--------------|----------------|---------------|---------------|------------|-----|
| MARIE                  | 2,066         | 1,540         | 115          | 1,535         | 53           | -            | -            | -              | -             | -             | -          |     |
| MBCSG                  | 766           | 1,015         | 150          | 569           | 8            | -            | -            | -              | -             | -             | -          |     |
| MCBCS                  | 2,093         | 1,999         | 59           | 1,903         | 6            | 35           | 96           | 3              | -             | -             | -          |     |
| MCCS                   | 1,207         | 1,034         | 2            | -             | -            | 142          | 86           | 0              | -             | -             | -          |     |
| MEC                    | 1,123         | 1,016         | 38           | 988           | 23           | -            | -            | -              | -             | -             | -          |     |
| MISS                   | 1,529         | 582           | 6            | 563           | 3            | 304          | 83           | 0              | -             | -             | -          |     |
| MMHS                   | 1,635         | 273           | 4            | -             | -            | 320          | 48           | 4              | -             | -             | -          |     |
| MYBRCA                 | -             | -             | -            | -             | -            | -            | -            | -              | 4,197         | 3,652         | 105        |     |
| NBCS                   | 212           | 2,334         | 31           | 1,370         | 4            | -            | -            | -              | -             | -             | -          |     |
| NBHS                   | -             | -             | -            | -             | -            | 122          | 79           | 0              | -             | -             | -          |     |
| NC-BCFR                | 150           | 614           | 69           | 602           | 5            | -            | -            | -              | 52            | 391           | 33         |     |
| NCBCS                  | 1,006         | 1,988         | 42           | -             | -            | -            | -            | -              | -             | -             | -          |     |
| OBCS                   | 414           | 467           | 10           | 445           | 1            | -            | -            | -              | -             | -             | -          |     |
| OFBCR                  | 728           | 1,908         | 143          | 1,656         | 51           | -            | -            | -              | -             | -             | -          |     |
| ORIGO                  | 0             | 1,090         | 89           | 1,053         | 69           | 132          | 134          | 15             | -             | -             | -          |     |
| PBCS                   | 2,082         | 1,719         | 40           | 1,625         | 9            | 331          | 215          | 2              | -             | -             | -          |     |
| PKARMA                 | 5,435         | 4,81          | 277          | 4,685         | 124          | 1            | 4            | 0              | -             | -             | -          |     |
| POSH                   | 0             | 1,069         | 19           | 1,063         | 16           | -            | -            | -              | -             | -             | -          |     |
| PREFACE                | 0             | 2,73          | 90           | -             | -            | -            | -            | -              | -             | -             | -          |     |
| PROCAS                 | 1,647         | 488           | 9            | 422           | 3            | -            | -            | -              | -             | -             | -          |     |
| RBCS                   | 0             | 873           | 152          | 724           | 81           | -            | -            | -              | -             | -             | -          |     |
| SASBAC                 | 1,378         | 1,118         | 22           | 1,086         | 5            | -            | -            | -              | -             | -             | -          |     |
| SBCS                   | 848           | 748           | 14           | 691           | 1            | -            | -            | -              | -             | -             | -          |     |
| SEARCH                 | 9,056         | 12,423        | 118          | 12,117        | 59           | 197          | 628          | 0              | -             | -             | -          |     |
| SEBCS                  | -             | -             | -            | -             | -            | -            | -            | -              | 2,236         | 2,080         | 21         |     |
| SGBCC                  | -             | -             | -            | -             | -            | -            | -            | -              | 4,141         | 1,250         | 124        |     |
| SKKDKFZS               | 29            | 1,084         | 71           | 1,054         | 41           | -            | -            | -              | -             | -             | -          |     |
| SMC                    | -             | -             | -            | -             | -            | 141          | 244          | 0              | -             | -             | -          |     |
| SUCCESSB               | 0             | 438           | 2            | -             | -            | -            | -            | -              | -             | -             | -          |     |
| SUCCESSC               | 0             | 2,807         | 29           | -             | -            | -            | -            | -              | -             | -             | -          |     |
| SZBCS                  | 489           | 676           | 6            | 409           | 1            | -            | -            | -              | -             | -             | -          |     |
| TNBCC                  | 152           | 1,037         | 2            | -             | -            | -            | -            | -              | -             | -             | -          |     |
| TWBCS                  | -             | -             | -            | -             | -            | -            | -            | -              | 492           | 1,250         | 17         |     |
| UCIBCS                 | 258           | 397           | 1            | 380           | 1            | 51           | 61           | 7              | -             | -             | -          |     |
| <b>Total</b>           | <b>62,830</b> | <b>81,000</b> | <b>3,607</b> | <b>55,041</b> | <b>1,027</b> | <b>3,753</b> | <b>3,781</b> | <b>94</b>      | <b>13,398</b> | <b>12,133</b> | <b>340</b> |     |
| <b>Characteristics</b> |               |               |              |               |              |              |              |                |               |               |            |     |
| <b>Invasiveness</b>    | in situ       | -             | excluded     | 361           | excluded     | 104          | -            | 3 <sup>b</sup> | 7             | -             | excluded   | 67  |
|                        | invasive      | -             | 79,876       | 2,200         | 54,675       | 670          | -            | 3,777          | 60            | -             | 11,929     | 209 |
|                        | unknown       | -             | 1,124        | 1,046         | 366          | 253          | -            | 1              | 27            | -             | 204        | 64  |
| <b>ER status</b>       | negative      | -             | 13,828       | 446           | 9,333        | 105          | -            | 766            | 8             | -             | 3,457      | 54  |
|                        | positive      | -             | 52,238       | 2,048         | 37,420       | 289          | -            | 3,001          | 47            | -             | 7,826      | 163 |
|                        | unknown       | -             | 14,934       | 1,113         | 8,288        | 633          | -            | 14             | 39            | -             | 850        | 123 |

Abbreviations: BC = breast cancer, CBC = contralateral breast cancer, ER = estrogen receptor

<sup>a</sup> Without any diagnosis of breast cancer

<sup>b</sup> Due to the use of a new freeze of the BCAC data, N=3 breast cancers were now defined as in situ, which had previously been defined as invasive; the original validation dataset contained data of two additional studies<sup>1</sup>

**Table S3. Variant information and breast cancer risk coefficients for the 77-variant PRS, 313-variant PRS, and ER-specific PRSs; previously published in Mavaddat et al.<sup>1;3</sup>**

**Table S4. Patient, tumor, and treatment characteristics of all women diagnosed with first invasive breast cancer since 1990 (European cohort)**

| <b>Characteristics</b>                                | <b>Number of women (%)<sup>a</sup></b> |
|-------------------------------------------------------|----------------------------------------|
| <b>Total</b>                                          | 56,068 (100)                           |
| <b>Median age at first diagnosis in years (range)</b> | 56 (18-98)                             |
| <b>Year of diagnosis</b>                              |                                        |
| 1990-1994                                             | 3,029 (5.4)                            |
| 1995-1999                                             | 10,153 (18.1)                          |
| 2000-2004                                             | 18,484 (33.0)                          |
| 2005-2009                                             | 17,575 (31.3)                          |
| 2010-2015                                             | 6,827 (12.2)                           |
| <b>Family history (first degree relative)</b>         |                                        |
| no                                                    | 33,623 (76.4)                          |
| yes                                                   | 10,369 (23.6)                          |
| unknown                                               | 12,076                                 |
| <b>Nodal status</b>                                   |                                        |
| negative                                              | 29,070 (61.9)                          |
| positive                                              | 17,903 (38.1)                          |
| unknown                                               | 9,095                                  |
| <b>Tumor size, cm</b>                                 |                                        |
| ≤2                                                    | 28,057 (63.8)                          |
| (2, 5]                                                | 14,138 (32.2)                          |
| >5                                                    | 1,750 (4.0)                            |
| unknown                                               | 12,123                                 |
| <b>Differentiation grade</b>                          |                                        |
| I                                                     | 8,721 (19.5)                           |
| II                                                    | 21,621 (48.3)                          |
| III                                                   | 14,454 (32.3)                          |
| unknown                                               | 11,272                                 |
| <b>Morphology</b>                                     |                                        |
| ductal                                                | 37,324 (76.6)                          |
| lobular                                               | 5,878 (12.1)                           |
| mixed (ductal and lobular)                            | 2,174 (4.5)                            |
| other                                                 | 3,344 (6.9)                            |
| unknown                                               | 7,348                                  |
|                                                       |                                        |

|                                        |                    |               |
|----------------------------------------|--------------------|---------------|
| <b>ER-status</b>                       |                    |               |
|                                        | negative           | 9,527 (20.0)  |
|                                        | positive           | 38,090 (80.0) |
|                                        | unknown            | 8,451         |
| <b>PR-status</b>                       |                    |               |
|                                        | negative           | 13,098 (32.6) |
|                                        | positive           | 27,044 (67.4) |
|                                        | unknown            | 15,926        |
| <b>HER2-status</b>                     |                    |               |
|                                        | negative           | 23,787 (82.7) |
|                                        | positive           | 4,969 (17.3)  |
|                                        | unknown            | 27,312        |
| <b>Surgery</b>                         |                    |               |
|                                        | yes, breast saving | 16,468 (42.3) |
|                                        | yes, mastectomy    | 11,315 (29.1) |
|                                        | yes, type unknown  | 11,163 (28.7) |
|                                        | unknown            | 17,122        |
| <b>(Neo)adjuvant chemotherapy</b>      |                    |               |
|                                        | no                 | 18,110 (49.4) |
|                                        | yes                | 18,559 (50.6) |
|                                        | unknown            | 19,399        |
| <b>(Neo)adjuvant endocrine therapy</b> |                    |               |
|                                        | no                 | 10,781 (28.3) |
|                                        | yes                | 27,322 (71.7) |
|                                        | unknown            | 17,965        |
| <b>Radiotherapy</b>                    |                    |               |
|                                        | no                 | 11,023 (27.4) |
|                                        | yes                | 29,142 (72.6) |
|                                        | unknown            | 15,903        |

Abbreviations: ER = estrogen receptor, PR = progesterone receptor, HER2 = human epidermal growth factor receptor 2

<sup>a</sup> Total may not be 100% because of rounding



**Table S5. Association between the 313-variant PRS (PRS<sub>313</sub>) and contralateral breast cancer risk in the European cohort**

| Percentile categories of the PRS <sub>313</sub> | No. of women | No. of CBC | HR per unit SD <sup>a</sup> | 95%CI     | P-value |
|-------------------------------------------------|--------------|------------|-----------------------------|-----------|---------|
| 0 <sup>th</sup> to 10 <sup>th</sup>             | 5,607        | 65         | 0.59                        | 0.45-0.78 | <.001   |
| 10 <sup>th</sup> to 20 <sup>th</sup>            | 5,606        | 79         | 0.71                        | 0.55-0.92 | .01     |
| 20 <sup>th</sup> to 40 <sup>th</sup>            | 11,214       | 165        | 0.74                        | 0.60-0.90 | .003    |
| 40 <sup>th</sup> to 60 <sup>th</sup>            | 11,214       | 224        | 1.00                        | Ref.      | -       |
| 60 <sup>th</sup> to 80 <sup>th</sup>            | 11,214       | 208        | 0.90                        | 0.74-1.08 | .25     |
| 80 <sup>th</sup> to 90 <sup>th</sup>            | 5,607        | 121        | 1.05                        | 0.84-1.31 | .69     |
| 90 <sup>th</sup> to 100 <sup>th</sup>           | 5,606        | 165        | 1.38                        | 1.13-1.69 | .002    |

Abbreviations: PRS = polygenic risk score, No = number, CBC = contralateral breast cancer, HR = hazard ratio, CI = confidence interval, SD = standard deviation

<sup>a</sup>The analysis was performed with attained age as time scale. Coefficients to construct the PRS<sub>313</sub> are shown in Table S3. The PRS<sub>313</sub> was standardized by SD=0.61, in line with Mavaddat et al.<sup>1</sup>

**Table S6. Multivariable Cox regression models of contralateral breast cancer risk by 313-variant PRS (PRS<sub>313</sub>) in all women, all women excluding studies oversampling cases with family history, and those with complete covariate information**

|                                                        | All patients                |           |         | All women excluding studies oversampling cases with family history |           |         | Complete case               |           |         |
|--------------------------------------------------------|-----------------------------|-----------|---------|--------------------------------------------------------------------|-----------|---------|-----------------------------|-----------|---------|
|                                                        | N=56,068 (CBC=1,027)        |           |         | N=51,883 (CBC=829)                                                 |           |         | N=12,065 (CBC=193)          |           |         |
|                                                        | HR per unit SD <sup>a</sup> | 95%CI     | P-value | HR per unit SD <sup>a</sup>                                        | 95%CI     | P-value | HR per unit SD <sup>a</sup> | 95%CI     | P-value |
| <i>Model 1</i><br><b>PRS<sub>313</sub><sup>b</sup></b> | 1.25                        | 1.18-1.33 | <.001   | 1.26                                                               | 1.17-1.34 | <.001   | 1.35                        | 1.17-1.56 | <.001   |
| <i>Model 2</i><br><b>PRS<sub>313</sub><sup>b</sup></b> | 1.23                        | 1.16-1.31 | <.001   | 1.25                                                               | 1.17-1.34 | <.001   | 1.33                        | 1.15-1.54 | <.001   |
| <b>Family history</b>                                  |                             |           |         |                                                                    |           |         |                             |           |         |
| yes vs. no                                             | 1.43                        | 1.24-1.64 | <.001   | 1.34                                                               | 1.13-1.59 | .001    | 1.49                        | 1.06-2.09 | .02     |
| unknown vs. no                                         | 0.93                        | 0.75-0.16 | .54     | 0.92                                                               | 0.73-1.16 | .47     | -                           | -         | -       |
| <i>Model 3</i><br><b>PRS<sub>313</sub><sup>b</sup></b> | 1.25                        | 1.18-1.33 | <.001   | 1.26                                                               | 1.17-1.34 | <.001   | 1.35                        | 1.17-1.56 | <.001   |
| <b>Nodal status</b>                                    |                             |           |         |                                                                    |           |         |                             |           |         |
| positive vs. negative                                  | 1.05                        | 0.91-1.20 | .50     | 1.07                                                               | 0.92-1.25 | .37     | 1.14                        | 0.85-1.53 | .37     |
| unknown vs. no                                         | 1.26                        | 1.04-1.53 | .02     | 1.29                                                               | 1.04-1.60 | .02     | -                           | -         | -       |
| <i>Model 4</i><br><b>PRS<sub>313</sub><sup>b</sup></b> | 1.25                        | 1.18-1.33 | <.001   | 1.26                                                               | 1.18-1.35 | <.001   | 1.35                        | 1.17-1.56 | <.001   |
| <b>Tumor size,</b>                                     |                             |           |         |                                                                    |           |         |                             |           |         |
| (2-5] vs. ≤2                                           | 1.08                        | 0.92-1.25 | .34     | 1.12                                                               | 0.95-1.32 | .20     | 0.93                        | 0.68-1.27 | .66     |
| >5 vs. ≤2                                              | 1.37                        | 0.99-1.89 | .06     | 1.45                                                               | 1.02-2.07 | .04     | 1.63                        | 0.93-2.85 | .09     |
| unknown vs. ≤2                                         | 1.23                        | 1.04-1.47 | .02     | 1.14                                                               | 0.94-1.39 | .18     | -                           | -         | -       |
| <i>Model 5</i><br><b>PRS<sub>313</sub><sup>b</sup></b> | 1.25                        | 1.17-1.33 | <.001   | 1.25                                                               | 1.17-1.34 | <.001   | 1.35                        | 1.17-1.57 | <.001   |
| <b>Differentiation grade</b>                           |                             |           |         |                                                                    |           |         |                             |           |         |
| II vs. I                                               | 0.93                        | 0.76-1.13 | .45     | 0.99                                                               | 0.80-1.24 | .94     | 0.98                        | 0.65-1.48 | .93     |
| III vs. I                                              | 0.90                        | 0.73-1.12 | .35     | 0.97                                                               | 0.76-1.24 | .81     | 1.09                        | 0.70-1.69 | .69     |
| unknown vs. I                                          | 1.20                        | 0.96-1.49 | .11     | 1.45                                                               | 1.13-1.86 | .004    | -                           | -         | -       |
| <i>Model 6</i><br><b>PRS<sub>313</sub><sup>b</sup></b> | 1.25                        | 1.17-1.33 | <.001   | 1.25                                                               | 1.17-1.34 | <.001   | 1.33                        | 1.16-1.54 | <.001   |
| <b>Morphology</b>                                      |                             |           |         |                                                                    |           |         |                             |           |         |
| lobular vs. ductal                                     | 1.26                        | 1.03-1.53 | .03     | 1.34                                                               | 1.08-1.67 | .008    | 1.48                        | 0.99-2.21 | .05     |
| mixed (ductal and lobular) vs. ductal                  | 1.28                        | 0.94-1.73 | .11     | 1.36                                                               | 0.98-1.88 | .06     | 1.48                        | 0.87-2.54 | .15     |
| other vs. ductal                                       | 1.04                        | 0.81-1.33 | .75     | 0.91                                                               | 0.66-1.24 | .55     | 1.24                        | 0.69-2.21 | .47     |
| unknown vs. ductal                                     | 1.77                        | 1.42-2.19 | <.001   | 1.82                                                               | 1.44-2.30 | <.001   | -                           | -         | -       |
| <i>Model 7</i><br><b>PRS<sub>313</sub><sup>b</sup></b> | 1.25                        | 1.18-1.33 | <.001   | 1.26                                                               | 1.18-1.35 | <.001   | 1.35                        | 1.17-1.56 | <.001   |
| <b>ER-status</b>                                       |                             |           |         |                                                                    |           |         |                             |           |         |
| positive vs. negative                                  | 0.88                        | 0.75-1.04 | .14     | 0.86                                                               | 0.72-1.03 | .11     | 0.90                        | 0.62-1.32 | .60     |
| unknown vs. negative                                   | 1.16                        | 0.93-0.43 | .19     | 1.11                                                               | 0.86-1.43 | .43     | -                           | -         | -       |
| <i>Model 7</i><br><b>PRS<sub>313</sub><sup>b</sup></b> | 1.25                        | 1.18-1.33 | <.001   | 1.26                                                               | 1.18-1.35 | <.001   | 1.35                        | 1.17-1.56 | <.001   |

|                                              |                         |      |           |       |      |           |       |      |           |       |
|----------------------------------------------|-------------------------|------|-----------|-------|------|-----------|-------|------|-----------|-------|
| <b>PR-status</b>                             | positive vs. negative   | 0.95 | 0.81-1.11 | .51   | 0.92 | 0.78-1.09 | .32   | 0.91 | 0.66-1.25 | .56   |
|                                              | unknown vs. negative    | 1.15 | 0.95-1.40 | .14   | 1.10 | 0.88-1.37 | .40   | -    | -         | -     |
| <i>Model 9</i>                               |                         |      |           |       |      |           |       |      |           |       |
| <b>PRS<sub>313</sub><sup>b</sup></b>         |                         | 1.25 | 1.18-1.33 | <.001 | 1.26 | 1.17-1.34 | <.001 | 1.34 | 1.16-1.55 | <.001 |
| <b>HER2-status</b>                           | positive vs. negative   | 0.84 | 0.64-1.11 | .22   | 0.76 | 0.56-1.05 | .10   | 0.70 | 0.45-1.10 | .12   |
|                                              | unknown vs. negative    | 1.29 | 1.11-1.50 | .001  | 1.28 | 1.08-1.52 | .004  | -    | -         | -     |
| <i>Model 10</i>                              |                         |      |           |       |      |           |       |      |           |       |
| <b>PRS<sub>313</sub><sup>b</sup></b>         |                         | 1.25 | 1.17-1.32 | <.001 | 1.26 | 1.17-1.34 | <.001 | 1.35 | 1.16-1.56 | <.001 |
| <b>Chemotherapy</b>                          | yes vs. no              | 0.86 | 0.73-1.01 | .06   | 0.99 | 0.83-1.19 | .92   | 0.89 | 0.64-1.25 | .51   |
|                                              | unknown vs. no          | 1.09 | 0.91-1.31 | .34   | 1.20 | 0.97-1.47 | .09   | -    | -         | -     |
| <i>Model 11</i>                              |                         |      |           |       |      |           |       |      |           |       |
| <b>PRS<sub>313</sub><sup>b</sup></b>         |                         | 1.25 | 1.18-1.33 | <.001 | 1.26 | 1.18-1.35 | <.001 | 1.36 | 1.17-1.57 | <.001 |
| <b>Endocrine therapy</b>                     | yes vs. no              | 0.75 | 0.64-0.88 | .001  | 0.92 | 0.75-1.12 | .41   | 0.78 | 0.55-1.11 | .17   |
|                                              | unknown vs. no          | 0.90 | 0.75-1.09 | .28   | 1.11 | 0.87-1.41 | .39   | -    | -         | -     |
| <i>Model 12</i>                              |                         |      |           |       |      |           |       |      |           |       |
| <b>PRS<sub>313</sub><sup>b</sup></b>         |                         | 1.25 | 1.17-1.32 | <.001 | 1.26 | 1.17-1.34 | <.001 | 1.35 | 1.17-1.56 | <.001 |
| <b>Radiotherapy</b>                          | yes vs. no              | 1.00 | 0.85-1.18 | 1.00  | 0.98 | 0.82-1.18 | .85   | 1.35 | 0.88-2.08 | .17   |
|                                              | unknown vs. no          | 1.41 | 1.14-1.74 | .001  | 1.18 | 0.93-1.50 | .17   | -    | -         | -     |
| <i>Model 13</i>                              |                         |      |           |       |      |           |       |      |           |       |
| <b>PRS<sub>313</sub><sup>b</sup></b>         |                         | 1.25 | 1.17-1.32 | <.001 | 1.25 | 1.17-1.34 | <.001 | 1.34 | 1.16-1.55 | <.001 |
| <b>Year of first breast cancer diagnosis</b> |                         | 0.95 | 0.94-0.96 | <.001 | 0.95 | 0.93-0.96 | <.001 | 0.90 | 0.86-0.95 | <.001 |
| <i>Model 14</i>                              |                         |      |           |       |      |           |       |      |           |       |
| <b>PRS<sub>313</sub><sup>b</sup></b>         | full model <sup>c</sup> | 1.23 | 1.16-1.31 | <.001 | 1.25 | 1.16-1.33 | <.001 | 1.33 | 1.15-1.53 | <.001 |

Abbreviations: PRS = polygenic risk score, CBC = contralateral breast cancer, HR = hazard ratio, CI = confidence interval, SD = standard deviation, ER = estrogen receptor, PR = progesterone receptor, HER2 = human epidermal growth factor receptor 2

<sup>a</sup> All analyses were performed with attained age as the time scale

<sup>b</sup> Coefficients to construct the PRS<sub>313</sub> are shown in Table S3. The PRS<sub>313</sub> was standardized by SD=0.61, in line with Mavaddat et al.<sup>1</sup>

<sup>c</sup> Adjusted for family history, nodal status, tumor size, differentiation grade, morphology, ER status, HER2 status, chemotherapy, endocrine therapy, radiotherapy, and year of first breast cancer diagnosis

**Table S7. Five- and ten-year cumulative risks of contralateral breast cancer by the 313-variant PRS (PRS<sub>313</sub>) for different age groups**

| Age at first breast cancer diagnosis (years) | 5-year cumulative CBC risks (%)<br>range by age |                                                |                                                |                                                |                                                | 10-year cumulative CBC risks (%)<br>range by age |                                                |                                                |                                                |                                                |
|----------------------------------------------|-------------------------------------------------|------------------------------------------------|------------------------------------------------|------------------------------------------------|------------------------------------------------|--------------------------------------------------|------------------------------------------------|------------------------------------------------|------------------------------------------------|------------------------------------------------|
|                                              | 5 <sup>th</sup> percentile PRS <sub>313</sub>   | 10 <sup>th</sup> percentile PRS <sub>313</sub> | 50 <sup>th</sup> percentile PRS <sub>313</sub> | 90 <sup>th</sup> percentile PRS <sub>313</sub> | 95 <sup>th</sup> percentile PRS <sub>313</sub> | 5 <sup>th</sup> percentile PRS <sub>313</sub>    | 10 <sup>th</sup> percentile PRS <sub>313</sub> | 50 <sup>th</sup> percentile PRS <sub>313</sub> | 90 <sup>th</sup> percentile PRS <sub>313</sub> | 95 <sup>th</sup> percentile PRS <sub>313</sub> |
| 30-34                                        | 1.9-3.3                                         | 2.1-3.6                                        | 2.8-4.7                                        | 3.7-6.2                                        | 4.0-6.8                                        | 3.3-4.4                                          | 3.6-4.8                                        | 4.7-6.3                                        | 6.2-8.3                                        | 6.8-9.1                                        |
| 35-39                                        | 0.8-2.2                                         | 0.9-2.4                                        | 1.2-3.2                                        | 1.6-4.2                                        | 1.7-4.6                                        | 2.2-3.9                                          | 2.4-4.2                                        | 3.2-5.5                                        | 4.2-7.2                                        | 4.6-8.0                                        |
| 40-44                                        | 1.5-2.9                                         | 1.7-3.2                                        | 2.2-4.2                                        | 2.9-5.5                                        | 3.2-6.0                                        | 2.9-4.9                                          | 3.2-5.3                                        | 4.2-7.0                                        | 5.5-9.1                                        | 6.0-10.0                                       |
| 45-49                                        | 1.4-2.5                                         | 1.5-2.8                                        | 2.0-3.7                                        | 2.6-4.8                                        | 2.9-5.3                                        | 2.5-4.2                                          | 2.8-4.5                                        | 3.7-6.0                                        | 4.8-7.8                                        | 5.3-8.6                                        |
| 50-54                                        | 1.4-2.9                                         | 1.5-3.1                                        | 2.0-4.1                                        | 2.6-5.5                                        | 2.9-6.0                                        | 2.9-4.8                                          | 3.1-5.3                                        | 4.1-6.9                                        | 5.5-9.1                                        | 6.0-10.0                                       |
| 55-59                                        | 1.6-3.3                                         | 1.8-3.6                                        | 2.4-4.7                                        | 3.1-6.2                                        | 3.4-6.8                                        | 3.3-5.3                                          | 3.6-5.7                                        | 4.7-7.5                                        | 6.2-9.8                                        | 6.8-10.8                                       |
| 60-64                                        | 1.8-3.5                                         | 1.9-3.8                                        | 2.6-5.0                                        | 3.4-6.5                                        | 3.7-7.2                                        | 3.5-5.5                                          | 3.8-6.0                                        | 5.0-7.9                                        | 6.5-10.3                                       | 7.2-11.3                                       |
| 65-70                                        | 1.5-3.5                                         | 1.7-3.8                                        | 2.2-5.0                                        | 2.9-6.6                                        | 3.2-7.2                                        | 3.5-4.6                                          | 3.8-5.0                                        | 5.0-6.6                                        | 6.6-8.7                                        | 7.2-9.5                                        |

Abbreviations: PRS = polygenic risk score, CBC = contralateral breast cancer

Coefficients to construct the PRS<sub>313</sub> are shown in Table S3. The PRS<sub>313</sub> was standardized by SD=0.61, in line with Mavaddat et al<sup>1</sup>. The CBC incidences for each age group were calculated based on incidence data from the Netherlands Cancer Registry<sup>2</sup> and relative risks estimated as described in the Material and Methods. In contrast to Table 4, death was not taken into account as competing risk

**Table S8. Estimates of unilateral- and contralateral breast cancer risk by the 313-variant PRS (PRS<sub>313</sub>) in the European case-case series and the Asian case-case series**

|                                         | European                      |           |         |                             |           |         | Asian                         |           |         |
|-----------------------------------------|-------------------------------|-----------|---------|-----------------------------|-----------|---------|-------------------------------|-----------|---------|
|                                         | Case-case series <sup>a</sup> |           |         | Validation set <sup>b</sup> |           |         | Case-case series <sup>a</sup> |           |         |
| PRS <sub>313</sub> <sup>c</sup>         | OR per unit SD                | 95%CI     | P-value | OR per unit SD              | 95%CI     | P-value | OR per unit SD                | 95%CI     | P-value |
| Unilateral breast cancer versus control | 1.82                          | 1.80-1.84 | <.001   | 1.67                        | 1.59-1.76 | <.001   | 1.56                          | 1.52-1.60 | <.001   |
| CBC versus unilateral breast cancer     | 1.30                          | 1.26-1.35 | <.001   | 1.39                        | 1.13-1.70 | .002    | 1.15                          | 1.02-1.29 | .02     |

Abbreviations: PRS = polygenic risk score, CBC = contralateral breast cancer, OR = odds ratio, SD = standard deviation, CI = confidence interval

<sup>a</sup> Adjusted for country and age. For all women with unilateral- and contralateral breast cancer we used age at first breast cancer diagnosis, and for control women without any diagnosis of breast cancer we used age at baseline questionnaire.

<sup>b</sup> The validation set was previously used to develop the PRS<sub>313</sub>; see details in materials and methods. For analyses in the current paper, this set is nested within the case-case series. These analyses were additionally adjusted for 10 principal components for comparability with the originally published PRS<sub>313</sub> overall estimates<sup>1</sup>

<sup>c</sup> Coefficients to construct the PRS<sub>313</sub> are shown in Table S3. The PRS<sub>313</sub> was standardized by SD=0.61, in line with Mavaddat et al.<sup>1</sup>

## Supplemental Note

Our initial aim was to externally validate our results using the UK Biobank, which seemed the most suitable cohort given the large number of women diagnosed with breast cancer with information available on the PRS<sub>313</sub>. However, when we started the analyses, it turned out that the UK Biobank had no information available on the laterality of the second breast tumor. Therefore, we were unable to distinguish between ipsilateral and contralateral breast cancer, and had to define our endpoint in these analyses as ‘any second breast cancer’. In addition, in comparison to our analyses in the BCAC, we were unable to exclude patients diagnosed with stage IV invasive first breast cancer from the UK Biobank cohort, and had limited information on metastases developed during follow-up.

The association between the overall breast cancer PRS<sub>313</sub> and (any) second breast cancer was evaluated among women aged  $\geq 18$  years of European ancestry from the UK Biobank cohort who had had a diagnosis of invasive first breast cancer. UK Biobank samples were genotyped using Affymetrix UK BiLEVE Axiom array and Affymetrix UK Biobank Axiom® array and imputed to the combined 1000 Genome Project v3 and UK10K reference panels using SHAPEIT3 and IMPUTE3<sup>4</sup>. The lowest imputation info score for the variants used in these analyses was 0.86. Samples were included for this analysis of the UK BIOBANK study on the basis of female sex (genetic and self-reported) and ethnicity filter (Europeans/White British ancestry subset). Duplicates and individuals with high degree of relatedness (samples which have  $>10$  putative third degree relatives) were removed, and we randomly excluded one of each related pair first-degree relatives. Samples were also excluded on standard quality control criteria. The PRS<sub>313</sub> was calculated as a weighted sum of the minor allele dosages; the variant selection and weights are as given by Mavaddat et al<sup>1</sup>. The PRS<sub>313</sub> was standardized by SD=0.61, in line with our BCAC analyses and Mavaddat et al<sup>1</sup>.

The final cohort included 10,567 women with invasive breast cancer among whom 302 registry-confirmed second breast cancers developed over 59,260 person-years of follow-up. A Cox proportional hazards model was used to assess the association between  $PRS_{313}$  and second breast cancer risk. Time at risk started three months after the age of first breast cancer diagnosis, where this was diagnosed after the baseline questionnaire date, or three months after the baseline questionnaire where first breast cancer was diagnosed before the baseline questionnaire date. Time at risk ended at the age of second breast cancer diagnosis (ipsilateral or contralateral), distant metastasis (where available), death or end of follow-up (at latest December 10, 2016). Potential effect modification of the  $PRS_{313}$  by age was evaluated by adding an interaction term ( $PRS_{313} \times \text{age at first breast cancer diagnosis [continuous]}$ ) in the model. We performed a separate analysis for invasive second breast cancer (241 breast cancers), where we censored on in situ second breast cancer.

The HR for a second breast cancer (in situ or invasive) per SD of  $PRS_{313}$  in the UK Biobank cohort was 1.13 (95%CI=1.01-1.26). We found no indication for interaction with age at first breast cancer diagnosis ( $HR_{\text{interaction}}=1.00$ , 95%CI=0.99-1.01;  $P=0.87$ ). When analyses were restricted to invasive second breast cancer, the HR per SD was 1.13 (95%CI=1.00-1.29).

## **Supplemental Acknowledgements**

### **Funding**

This work was supported by the Alpe d'HuZes/Dutch Cancer Society (KWF Kankerbestrijding) (grant number A6C/6253).

BCAC is funded by Cancer Research UK [C1287/A16563, C1287/A10118], the European Union's Horizon 2020 Research and Innovation Programme (grant numbers 634935 and 633784 for BRIDGES and B-CAST respectively), and by the European Community's Seventh Framework Programme under grant agreement number 223175 (grant number HEALTH-F2-2009-223175) (COGS). The EU Horizon 2020 Research and Innovation Programme funding source had no role in study design, data collection, data analysis, data interpretation or writing of the report.

Genotyping of the OncoArray was funded by the NIH Grant U19 CA148065, and Cancer UK Grant C1287/A16563 and the PERSPECTIVE project supported by the Government of Canada through Genome Canada and the Canadian Institutes of Health Research (grant GPH-129344) and, the Ministère de l'Économie, Science et Innovation du Québec through Genome Québec and the PSRSIIRI-701 grant, and the Quebec Breast Cancer Foundation. Funding for the iCOGS infrastructure came from: the European Community's Seventh Framework Programme under grant agreement n° 223175 (HEALTH-F2-2009-223175) (COGS), Cancer Research UK (C1287/A10118, C1287/A10710, C12292/A111174, C1281/A12014, C5047/A8384, C5047/A15007, C5047/A10692, C8197/A16565), the National Institutes of Health (CA128978) and Post-Cancer GWAS initiative (1U19 CA148537, 1U19 CA148065 and 1U19 CA148112 - the GAME-ON initiative), the Department of Defence (W81XWH-10-1-0341), the Canadian Institutes of Health Research (CIHR) for the CIHR Team in Familial Risks of Breast Cancer, and Komen Foundation for the Cure, the Breast Cancer Research Foundation, and the Ovarian Cancer Research Fund.



The Australian Breast Cancer Family Study (ABCFS) was supported by grant UM1 CA164920 from the National Cancer Institute (USA). The content of this manuscript does not necessarily reflect the views or policies of the National Cancer Institute or any of the collaborating centers in the Breast Cancer Family Registry (BCFR), nor does mention of trade names, commercial products, or organizations imply endorsement by the USA Government or the BCFR. The ABCFS was also supported by the National Health and Medical Research Council of Australia, the New South Wales Cancer Council, the Victorian Health Promotion Foundation (Australia) and the Victorian Breast Cancer Research Consortium. J.L.H. is a National Health and Medical Research Council (NHMRC) Senior Principal Research Fellow. M.C.S. is a NHMRC Senior Research Fellow. The ABCS study was supported by the Dutch Cancer Society [grants NKI 2007-3839; 2009 4363]. The Australian Breast Cancer Tissue Bank (ABCTB) was supported by the National Health and Medical Research Council of Australia, The Cancer Institute NSW and the National Breast Cancer Foundation. The work of the BBCC was partly funded by ELAN-Fond of the University Hospital of Erlangen. The BBCS is funded by Cancer Research UK and Breast Cancer Now and acknowledges NHS funding to the NIHR Biomedical Research Centre, and the National Cancer Research Network (NCRN). The BCEES was funded by the National Health and Medical Research Council, Australia and the Cancer Council Western Australia and acknowledges funding from the National Breast Cancer Foundation (JS). For the BCFR-NY, BCFR-PA, BCFR-UT this work was supported by grant UM1 CA164920 from the National Cancer Institute. The content of this manuscript does not necessarily reflect the views or policies of the National Cancer Institute or any of the collaborating centers in the Breast Cancer Family Registry (BCFR), nor does mention of trade names, commercial products, or organizations imply endorsement by the US Government or the BCFR. The BCINIS study was supported in part by the BCRF (Breast Cancer Research Foundation, NY, USA). For BIGGS, ES is supported by NIHR Comprehensive Biomedical Research Centre, Guy's & St. Thomas' NHS Foundation Trust in partnership with King's College London, United Kingdom. IT is supported by the Oxford Biomedical Research Centre. The BREast Oncology GALician Network

(BREOGAN) is funded by Acción Estratégica de Salud del Instituto de Salud Carlos III FIS PI12/02125/Cofinanciado FEDER, FIS PI17/00918/Cofinanciado FEDER; Acción Estratégica de Salud del Instituto de Salud Carlos III FIS Intrasalud (PI13/01136); Programa Grupos Emergentes, Cancer Genetics Unit, Instituto de Investigación Biomedica Galicia Sur. Xerencia de Xestión Integrada de Vigo-SERGAS, Instituto de Salud Carlos III, Spain; Grant 10CSA012E, Consellería de Industria Programa Sectorial de Investigación Aplicada, PEME I + D e I + D Suma del Plan Gallego de Investigación, Desarrollo e Innovación Tecnológica de la Consellería de Industria de la Xunta de Galicia, Spain; Grant EC11-192. Fomento de la Investigación Clínica Independiente, Ministerio de Sanidad, Servicios Sociales e Igualdad, Spain; and Grant FEDER-Innterconecta. Ministerio de Economía y Competitividad, Xunta de Galicia, Spain. The BSUCH study was supported by the Dietmar-Hopp Foundation, the Helmholtz Society and the German Cancer Research Center (DKFZ). CBCS is funded by the Canadian Cancer Society (grant # 313404) and the Canadian Institutes of Health Research. CCGP is supported by funding from the University of Crete. The CGPS was supported by the Chief Physician Johan Boserup and Lise Boserup Fund, the Danish Medical Research Council, and Herlev and Gentofte Hospital. The CNIO-BCS was supported by the Instituto de Salud Carlos III, the Fondo de Investigación Sanitario (PI16/00440 with FEDER funds), and CIBERER (Spanish Network on Rare diseases). The CTS was initially supported by the California Breast Cancer Act of 1993 and the California Breast Cancer Research Fund (contract 97-10500) and is currently funded through the National Institutes of Health (R01 CA77398, UM1 CA164917, and U01 CA199277). Collection of cancer incidence data was supported by the California Department of Public Health as part of the statewide cancer reporting program mandated by California Health and Safety Code Section 103885. HAC receives support from the Lon V Smith Foundation (LVS39420). The University of Westminster curates the DietCompLyf database funded by Against Breast Cancer Registered Charity No. 1121258 and the NCRN. FHRISK is funded from NIHR grant PGfAR 0707-10031. The GC-HBOC (German Consortium of Hereditary Breast and Ovarian Cancer) is supported by the German Cancer Aid (grant no 110837, coordinator: Rita K. Schmutzler, Cologne). This work was

also funded by the European Regional Development Fund and Free State of Saxony, Germany (LIFE - Leipzig Research Centre for Civilization Diseases, project numbers 713-241202, 713-241202, 14505/2470, 14575/2470). The GENICA was funded by the Federal Ministry of Education and Research (BMBF) Germany grants 01KW9975/5, 01KW9976/8, 01KW9977/0 and 01KW0114, the Robert Bosch Foundation, Stuttgart, Deutsches Krebsforschungszentrum (DKFZ), Heidelberg, the Institute for Prevention and Occupational Medicine of the German Social Accident Insurance, Institute of the Ruhr University Bochum (IPA), Bochum, as well as the Department of Internal Medicine, Evangelische Kliniken Bonn gGmbH, Johanniter Krankenhaus, Bonn, Germany. The GESBC was supported by the Deutsche Krebshilfe e. V. [70492] and the German Cancer Research Center (DKFZ). GLACIER was supported by Breast Cancer Now, CRUK and Biomedical Research Centre at Guy's and St Thomas' NHS Foundation Trust and King's College London. The HABCS study was supported by the Claudia von Schilling Foundation for Breast Cancer Research, by the Lower Saxonian Cancer Society, and by the Rudolf Bartling Foundation. The HEBCS was financially supported by the Helsinki University Hospital Research Fund, the Finnish Cancer Society, and the Sigrid Juselius Foundation. The HERPACC was supported by MEXT Kakenhi (No. 170150181 and 26253041) from the Ministry of Education, Science, Sports, Culture and Technology of Japan, by a Grant-in-Aid for the Third Term Comprehensive 10-Year Strategy for Cancer Control from Ministry Health, Labour and Welfare of Japan, by Health and Labour Sciences Research Grants for Research on Applying Health Technology from Ministry Health, Labour and Welfare of Japan, by National Cancer Center Research and Development Fund, and "Practical Research for Innovative Cancer Control (15ck0106177h0001)" from Japan Agency for Medical Research and development, AMED, and Cancer Bio Bank Aichi. The HMBCS was supported by a grant from the Friends of Hannover Medical School and by the Rudolf Bartling Foundation. The HUBCS was supported by a grant from the German Federal Ministry of Research and Education (RUS08/017), and by the Russian Foundation for Basic Research and the Federal Agency for Scientific Organizations for support the Bioresource collections and RFBR grants 14-04-97088, 17-29-06014 and 17-44-020498. ICICLE

was supported by Breast Cancer Now, CRUK and Biomedical Research Centre at Guy's and St Thomas' NHS Foundation Trust and King's College London. Financial support for KARBAC was provided through the regional agreement on medical training and clinical research (ALF) between Stockholm County Council and Karolinska Institutet, the Swedish Cancer Society, The Gustav V Jubilee foundation and Bert von Kantzows foundation. The KARMA study was supported by Märit and Hans Rausings Initiative Against Breast Cancer. The KBCP was financially supported by the special Government Funding (EVO) of Kuopio University Hospital grants, Cancer Fund of North Savo, the Finnish Cancer Organizations, and by the strategic funding of the University of Eastern Finland. kConFab is supported by a grant from the National Breast Cancer Foundation, and previously by the National Health and Medical Research Council (NHMRC), the Queensland Cancer Fund, the Cancer Councils of New South Wales, Victoria, Tasmania and South Australia, and the Cancer Foundation of Western Australia. Financial support for the AOCS was provided by the United States Army Medical Research and Materiel Command [DAMD17-01-1-0729], Cancer Council Victoria, Queensland Cancer Fund, Cancer Council New South Wales, Cancer Council South Australia, The Cancer Foundation of Western Australia, Cancer Council Tasmania and the National Health and Medical Research Council of Australia (NHMRC; 400413, 400281, 199600). G.C.T. and P.W. are supported by the NHMRC. RB was a Cancer Institute NSW Clinical Research Fellow. LMBC is supported by the 'Stichting tegen Kanker'. DL is supported by the FWO. The MABCS study is funded by the Research Centre for Genetic Engineering and Biotechnology "Georgi D. Efremov", MASA. The MARIE study was supported by the Deutsche Krebshilfe e.V. [70-2892-BR I, 106332, 108253, 108419, 110826, 110828], the Hamburg Cancer Society, the German Cancer Research Center (DKFZ) and the Federal Ministry of Education and Research (BMBF) Germany [01KH0402]. MBCSG is supported by grants from the Italian Association for Cancer Research (AIRC) and by funds from the Italian citizens who allocated the 5/1000 share of their tax payment in support of the Fondazione IRCCS Istituto Nazionale Tumori, according to Italian laws (INT-Institutional strategic projects "5x1000"). The MCBCS was supported by the NIH grants CA192393, CA116167,

CA176785 an NIH Specialized Program of Research Excellence (SPORE) in Breast Cancer [CA116201], and the Breast Cancer Research Foundation and a generous gift from the David F. and Margaret T. Grohne Family Foundation. The Melbourne Collaborative Cohort Study (MCCS) cohort recruitment was funded by VicHealth and Cancer Council Victoria. The MCCS was further augmented by Australian National Health and Medical Research Council grants 209057, 396414 and 1074383 and by infrastructure provided by Cancer Council Victoria. Cases and their vital status were ascertained through the Victorian Cancer Registry and the Australian Institute of Health and Welfare, including the National Death Index and the Australian Cancer Database. The Multiethnic Cohort Study (MEC) was funded by NIH grant U01 CA164973. The MEC was supported by NIH grants CA63464, CA54281, CA098758, CA132839 and CA164973. The MISS study is supported by funding from ERC-2011-294576 Advanced grant, Swedish Cancer Society, Swedish Research Council, Local hospital funds, Berta Kamprad Foundation, Gunnar Nilsson. The MMHS study was supported by NIH grants CA97396, CA128931, CA116201, CA140286 and CA177150. MYBRCA is funded by research grants from the Malaysian Ministry of Higher Education (UM.C/HIR/MOHE/06) and Cancer Research Malaysia. Genotyping for MyBrCa and SGBCC were supported by grants from Newton-Ungku Omar Fund [grant no: MR/P012930/1] and Wellcome Trust [grant no: v203477/Z/16/Z]. The Malaysian Breast Cancer Genetic Study was established using funds from the Malaysian Ministry of Science, and the Malaysian Ministry of Higher Education High Impact Research Grant [grant no: UM.C/HIR/MOHE/06]. The Malaysian Mammographic Density Study was established using funds raised through the Sime Darby LPGA tournament and the High Impact Research Grant. Additional funding was received from Yayasan Sime Darby, PETRONAS, Estee Lauder Group of Companies and other donors of Cancer Research Malaysia. MYMAMMO is supported by research grants from Yayasan Sime Darby LPGA Tournament and Malaysian Ministry of Higher Education (RP046B-15HTM). The NBCS has received funding from the K.G. Jebsen Centre for Breast Cancer Research; the Research Council of Norway grant 193387/V50 (to A-L Børresen-Dale and V.N. Kristensen) and grant 193387/H10 (to A-L Børresen-Dale and V.N. Kristensen), South Eastern Norway

Health Authority (grant 39346 to A-L Børresen-Dale) and the Norwegian Cancer Society (to A-L Børresen-Dale and V.N. Kristensen). The NBHS was supported by NIH grant R01CA100374. Biological sample preparation was conducted the Survey and Biospecimen Shared Resource, which is supported by P30 CA68485. The Northern California Breast Cancer Family Registry (NC-BCFR) and Ontario Familial Breast Cancer Registry (OFBCR) were supported by grant UM1 CA164920 from the National Cancer Institute (USA). The content of this manuscript does not necessarily reflect the views or policies of the National Cancer Institute or any of the collaborating centers in the Breast Cancer Family Registry (BCFR), nor does mention of trade names, commercial products, or organizations imply endorsement by the USA Government or the BCFR. The Carolina Breast Cancer Study was funded by Komen Foundation, the National Cancer Institute (P50 CA058223, U54 CA156733, U01 CA179715), and the North Carolina University Cancer Research Fund. The OBCS was supported by research grants from the Finnish Cancer Foundation, the Academy of Finland (grant number 250083, 122715 and Center of Excellence grant number 251314), the Finnish Cancer Foundation, the Sigrid Juselius Foundation, the University of Oulu, the University of Oulu Support Foundation and the special Governmental EVO funds for Oulu University Hospital-based research activities. The ORIGO study was supported by the Dutch Cancer Society (RUL 1997-1505) and the Biobanking and Biomolecular Resources Research Infrastructure (BBMRI-NL CP16). The PBCS was funded by Intramural Research Funds of the National Cancer Institute, Department of Health and Human Services, USA. The POSH study is funded by Cancer Research UK (grants C1275/A11699, C1275/C22524, C1275/A19187, C1275/A15956 and Breast Cancer Campaign 2010PR62, 2013PR044). PROCAS is funded from NIHR grant PGfAR 0707-10031. DGE, AH and WN are supported by the all Manchester NIHR Biomedical Research Centre (IS-BRC-1215-20007). The RBCS was funded by the Dutch Cancer Society (DDHK 2004-3124, DDHK 2009-4318). The SASBAC study was supported by funding from the Agency for Science, Technology and Research of Singapore (A\*STAR), the US National Institute of Health (NIH) and the Susan G. Komen Breast Cancer Foundation. The SBCS was supported by Sheffield Experimental Cancer Medicine Centre and

Breast Cancer Now Tissue Bank. SEARCH is funded by Cancer Research UK [C490/A10124, C490/A16561] and supported by the UK National Institute for Health Research Biomedical Research Centre at the University of Cambridge. The University of Cambridge has received salary support for PDPP from the NHS in the East of England through the Clinical Academic Reserve. SEBCS was supported by the BRL (Basic Research Laboratory) program through the National Research Foundation of Korea funded by the Ministry of Education, Science and Technology (2012-0000347). SGBCC is supported by the National Research Foundation Singapore (NRF-NRFF2017-02), NUS start-up Grant, National University Cancer Institute Singapore (NCIS) Centre Grant [NMRC/CG/NCIS/2010, NMRC/CG/012/2013, CGAug16M005], Saw Swee Hock School of Public Health Research Programme of Research Seed Funding (Breast Cancer Prevention Program), Asian Breast Cancer Research Fund, and the NMRC Clinician Scientist Award (SI Category) [NMRC/CSA-SI/0015/2017]. Controls from Singapore were recruited by the Singapore Consortium of Cohort Studies-Multi-ethnic cohort (SCCS-MEC), which was funded by the Biomedical Research Council, grant number: 05/1/21/19/425. SKKDKFZS is supported by the DKFZ. The SMC is funded by the Swedish Cancer Foundation and the Swedish Research Council (VR 2017-00644) grant for the Swedish Infrastructure for Medical Population-based Life-course Environmental Research (SIMPLER). The SZBCS was supported by Grant PBZ\_KBN\_122/P05/2004 and the program of the Minister of Science and Higher Education under the name "Regional Initiative of Excellence" in 2019-2022 project number 002 / RID / 2018/19, amount of financing 12 000 000 PLN. The TWBCS is supported by the Taiwan Biobank project of the Institute of Biomedical Sciences, Academia Sinica, Taiwan. The UCIBCS component of this research was supported by the NIH [CA58860, CA92044] and the Lon V Smith Foundation [LVS39420].

## **Acknowledgements**

We thank all the individuals who took part in these studies and all the researchers, clinicians, technicians and administrative staff who have enabled this work to be carried out. The COGS study would not have been possible without the contributions of the following: Kyriaki Michailidou, Qin Wang (BCAC). ABCFS thank Maggie Angelakos, Judi Maskiell, Gillian Dite. ABCS thanks the Blood bank Sanquin, The Netherlands. ABCTB Investigators: Christine Clarke, Deborah Marsh, Rodney Scott, Robert Baxter, Desmond Yip, Jane Carpenter, Alison Davis, Nirmala Pathmanathan, Peter Simpson, J. Dinny Graham, Mythily Sachchithananthan. Samples are made available to researchers on a non-exclusive basis. BBCS thanks Eileen Williams, Elaine Ryder-Mills, Kara Sargus. BCEES thanks Allyson Thomson, Christobel Saunders, Terry Slevin, BreastScreen Western Australia, Elizabeth Wylie, Rachel Lloyd. The BCINIS study would not have been possible without the contributions of Dr. K. Landsman, Dr. N. Gronich, Dr. A. Flugelman, Dr. W. Saliba, Dr. E. Liani, Dr. I. Cohen, Dr. S. Kalet, Dr. V. Friedman, Dr. O. Barnet of the NICCC in Haifa, and all the contributing family medicine, surgery, pathology and oncology teams in all medical institutes in Northern Israel. BIGGS thanks Niall McInerney, Gabrielle Colleran, Andrew Rowan, Angela Jones. The BREOGAN study would not have been possible without the contributions of the following: Manuela Gago-Dominguez, Jose Esteban Castelao, Angel Carracedo, Victor Muñoz Garzón, Alejandro Novo Domínguez, Maria Elena Martinez, Sara Miranda Ponte, Carmen Redondo Marey, Maite Peña Fernández, Manuel Enguix Castelo, Maria Torres, Manuel Calaza (BREOGAN), José Antúnez, Máximo Fraga and the staff of the Department of Pathology and Biobank of the University Hospital Complex of Santiago-CHUS, Instituto de Investigación Sanitaria de Santiago, IDIS, Xerencia de Xestión Integrada de Santiago-SERGAS; Joaquín González-Carreró and the staff of the Department of Pathology and Biobank of University Hospital Complex of Vigo, Instituto de Investigación Biomedica Galicia Sur, SERGAS, Vigo, Spain. BSUCH thanks Peter Bugert, Medical Faculty Mannheim. CBCS thanks study participants, co-investigators, collaborators and staff of the Canadian Breast Cancer Study, and project coordinators Agnes Lai and



Celine Morissette. CCGP thanks Styliani Apostolaki, Anna Margiolaki, Georgios Nintos, Maria Perraki, Georgia Saloustrou, Georgia Sevastaki, Konstantinos Pompodakis. CGPS thanks staff and participants of the Copenhagen General Population Study. For the excellent technical assistance: Dorthe Uldall Andersen, Maria Birna Arnadottir, Anne Bank, Dorthe Kjeldgård Hansen. The Danish Cancer Biobank is acknowledged for providing infrastructure for the collection of blood samples for the cases. CNIO-BCS thanks Guillermo Pita, Charo Alonso, Nuria Álvarez, Pilar Zamora, Primitiva Menendez, the Human Genotyping-CEGEN Unit (CNIO). The CTS Steering Committee includes Leslie Bernstein, Susan Neuhausen, James Lacey, Sophia Wang, Huiyan Ma, and Jessica Clague DeHart at the Beckman Research Institute of City of Hope, Dennis Deapen, Rich Pinder, and Eunjung Lee at the University of Southern California, Pam Horn-Ross, Peggy Reynolds, Christina Clarke Dur and David Nelson at the Cancer Prevention Institute of California, Hoda Anton-Culver, Argyrios Ziogas, and Hannah Park at the University of California Irvine, and Fred Schumacher at Case Western University. DIETCOMPLYF thanks the patients, nurses and clinical staff involved in the study. The DietCompLyf study was funded by the charity Against Breast Cancer (Registered Charity Number 1121258) and the NCRN. FHRISK thanks NIHR for funding. GC-HBOC thanks Stefanie Engert, Heide Hellebrand, Sandra Kröber and LIFE - Leipzig Research Centre for Civilization Diseases (Markus Loeffler, Joachim Thiery, Matthias Nüchter, Ronny Baber). The GENICA Network: Dr. Margarete Fischer-Bosch-Institute of Clinical Pharmacology, Stuttgart, and University of Tübingen, Germany [HB, Wing-Yee Lo], German Cancer Consortium (DKTK) and German Cancer Research Center (DKFZ), Partner Site Tübingen, 72074 Tübingen, Germany [HB], gefördert durch die Deutsche Forschungsgemeinschaft (DFG) im Rahmen der Exzellenzstrategie des Bundes und der Länder - EXC 2180 - 390900677 [HB], Department of Internal Medicine, Evangelische Kliniken Bonn gGmbH, Johanniter Krankenhaus, Bonn, Germany [Yon-Dschun Ko, Christian Baisch], Institute of Pathology, University of Bonn, Germany [Hans-Peter Fischer], Molecular Genetics of Breast Cancer, Deutsches Krebsforschungszentrum (DKFZ), Heidelberg, Germany [Ute Hamann], Institute for Prevention and Occupational Medicine of

the German Social Accident Insurance, Institute of the Ruhr University Bochum (IPA), Bochum, Germany [Thomas Brüning, Beate Pesch, Sylvia Rabstein, Anne Lotz]; and Institute of Occupational Medicine and Maritime Medicine, University Medical Center Hamburg-Eppendorf, Germany [Volker Harth]. GLACIER thanks Kelly Kohut, Patricia Gorman, Maria Troy. HABCS thanks Michael Bremer. HEBCS thanks Johanna Kiiski, Carl Blomqvist, Kristiina Aittomäki, Rainer Fagerholm, Kirsimari Aaltonen, Karl von Smitten, Irja Erkkilä. HKBCS thanks Hong Kong Sanatorium and Hospital, Dr Ellen Li Charitable Foundation, The Kerry Group Kuok Foundation, National Institute of Health 1R03CA130065 and the North California Cancer Center for support. HMBCS thanks Peter Hillemanns, Hans Christiansen and Johann H. Karstens. HUBCS thanks Shamil Gantsev. ICICLE thanks Kelly Kohut, Michele Caneppele, Maria Troy. KARMA and SASBAC thank the Swedish Medical Research Counsel. KBCP thanks Eija Myöhänen, Helena Kemiläinen. kConFab/AOCS wish to thank Heather Thorne, Eveline Niedermayr, all the kConFab research nurses and staff, the heads and staff of the Family Cancer Clinics, and the Clinical Follow Up Study (which has received funding from the NHMRC, the National Breast Cancer Foundation, Cancer Australia, and the National Institute of Health (USA)) for their contributions to this resource, and the many families who contribute to kConFab. LMBC thanks Gilian Peuteman, Thomas Van Brussel, EvyVanderheyden and Kathleen Corthouts. MABCS thanks Snezhana Smichkoska, Emilija Lazarova (University Clinic of Radiotherapy and Oncology), Katerina Kubelka-Sabit, Mitko Karadjozov (Adzibadem-Sistina Hospital), Andrej Arsovski and Liljana Stojanovska (Re-Medika Hospital) for their contributions and commitment to this study. MARIE thanks Petra Seibold, Dieter Flesch-Janys, Judith Heinz, Nadia Obi, Alina Vrieling, Sabine Behrens, Ursula Eilber, Muhabbet Celik, Til Olchers and Stefan Nickels. MBCSG (Milan Breast Cancer Study Group): Paolo, Peterlongo, Siranoush Manoukian, Bernard Peissel, Jacopo Azzollini, Dario Zimbalatti, Daniela Zaffaroni, Bernardo Bonanni, Irene Feroce, Mariarosaria Calvello, Aliana Guerrieri Gonzaga, Monica Marabelli, Davide Bondavalli and the personnel of the Cogentech Cancer Genetic Test Laboratory. The MCCS was made possible by the contribution of many people, including the original investigators, the teams that recruited the participants and

continue working on follow-up, and the many thousands of Melbourne residents who continue to participate in the study. We thank the coordinators, the research staff and especially the MMHS participants for their continued collaboration on research studies in breast cancer. MYBRCA thanks study participants and research staff (particularly Patsy Ng, Nurhidayu Hassan, Yoon Sook-Yee, Daphne Lee, Lee Sheau Yee, Phuah Sze Yee and Norhashimah Hassan) for their contributions and commitment to this study. The following are NBCS Collaborators: Anne-Lise Børresen-Dale (Prof. Em.), Kristine K. Sahlberg (PhD), Lars Ottestad (MD), Rolf Kåresen (Prof. Em.) Dr. Ellen Schlichting (MD), Marit Muri Holmen (MD), Toril Sauer (MD), Vilde Haakensen (MD), Olav Engebråten (MD), Bjørn Naume (MD), Alexander Fosså (MD), Cecile E. Kiserud (MD), Kristin V. Reinertsen (MD), Åslaug Helland (MD), Margit Riis (MD), Jürgen Geisler (MD), OSBREAC and Grethe I. Grenaker Alnæs (MSc). NBHS and SBCGS thank study participants and research staff for their contributions and commitment to the studies. OBCS thanks Arja Jukkola-Vuorinen, Mervi Grip, Saira Kauppila, Meeri Otsukka, Leena Keskitalo and Kari Mononen for their contributions to this study. OFBCR thanks Teresa Selander, Nayana Weerasooriya. ORIGO thanks E. Krol-Warmerdam, and J. Blom for patient accrual, administering questionnaires, and managing clinical information. The LUMC survival data were retrieved from the Leiden hospital-based cancer registry system (ONCDOC) with the help of Dr. J. Molenaar. PBCS thanks Louise Brinton, Mark Sherman, Neonila Szeszenia-Dabrowska, Beata Peplonska, Witold Zatonski, Pei Chao, Michael Stagner. The ethical approval for the POSH study is MREC /00/6/69, UKCRN ID: 1137. We thank staff in the Experimental Cancer Medicine Centre (ECMC) supported Faculty of Medicine Tissue Bank and the Faculty of Medicine DNA Banking resource. PREFACE thanks Sonja Oeser and Silke Landrith. PROCAS thanks NIHR for funding. RBCS thanks Jannet Blom, Saskia Pelders, Annette Heemskerk and the Erasmus MC Family Cancer Clinic. SBCS thanks Sue Higham, Helen Cramp, Dan Connley, Ian Brock, Sabapathy Balasubramanian and Malcolm W.R. Reed. We thank the SEARCH and EPIC teams. SGBCC thanks the participants and research coordinator Ms Tan Siew Li. SKKDKFZS thanks all study participants, clinicians, family doctors, researchers and technicians for their contributions and commitment to

this study. We thank the SUCCESS Study teams in Munich, Duessldorf, Erlangen and Ulm. SZBCS thanks Ewa Putresza. UCIBCS thanks Irene Masunaka. We thank the registration team of the Netherlands Comprehensive Cancer Organisation (IKNL) for the collection of data for the Netherlands Cancer Registry as well as IKNL staff for scientific advice.

## Supplemental References

1. Mavaddat, N., Michailidou, K., Dennis, J., Lush, M., Fachal, L., Lee, A., Tyrer, J.P., Chen, T.H., Wang, Q., Bolla, M.K., et al. (2019). Polygenic Risk Scores for Prediction of Breast Cancer and Breast Cancer Subtypes. *American journal of human genetics* 104, 21-34.
2. Kramer, I., Schaapveld, M., Oldenburg, H.S.A., Sonke, G.S., McCool, D., van Leeuwen, F.E., Van de Vijver, K.K., Russell, N.S., Linn, S.C., Siesling, S., et al. (2019). The influence of adjuvant systemic regimens on contralateral breast cancer risk and receptor subtype. *J Natl Cancer Inst.*
3. Mavaddat, N., Pharoah, P.D., Michailidou, K., Tyrer, J., Brook, M.N., Bolla, M.K., Wang, Q., Dennis, J., Dunning, A.M., Shah, M., et al. (2015). Prediction of breast cancer risk based on profiling with common genetic variants. *J Natl Cancer Inst* 107.
4. O'Connell, J., Sharp, K., Shrine, N., Wain, L., Hall, I., Tobin, M., Zagury, J.F., Delaneau, O., and Marchini, J. (2016). Haplotype estimation for Biobank-scale data sets. *Nature genetics* 48, 817-820.
